# Supplementary material
Source: MDPI journal article supplement (https://www.mdpi.com/2312-7481/7/6/79)
Supplement: s1 [file s1]

Archive with 5 entries (5 files):
- 1_AcrCN.cif
- 1_MalCN.cif
- 1_MeCN.cif
- 1_PrCN.cif
- magnetochemistry-1239858-Supplementary Materials.pdf
