# Supplementary material
Source: MDPI journal article supplement (https://www.mdpi.com/2312-7481/7/6/79)
Supplement: s1 [file s1 › 1_AcrCN.cif]

#\#CIF_1.1

#  CIF produced by WinGX routine CIF_UPDATE
#  Created on 2021-03-11 at 13:57:55
#  Using CIFtbx version 3.0.4  1 Sep 2006

#  Dictionary name : cif_core.dic
#  Dictionary vers : 2.4.5
#  Request file    : c:\wingx\files\archive.reqdat
#  CIF files read  : mlks339_0m_a project

#------------------ SECTION 1. GLOBAL INFORMATION ---------------------------#

data_global

#------------------ AUDIT DETAILS -------------------------------------------#

_audit_creation_date            2021-03-11
_audit_creation_method          'WinGX routine CIF_UPDATE'
_audit_conform_dict_name        cif_core.dic
_audit_conform_dict_version     2.4.3
_audit_conform_dict_location    ftp://ftp.iucr.org/pub/cif_core.dic
_audit_update_record            ?

#------------------ AUTHOR DETAILS -------------------------------------------#

# Name and address of author for correspondence

_publ_contact_author_name       'Liberka, Michal'
_publ_contact_author_address
;
Gronostajowa 2, 30-387 Krakow, Poland
;
_publ_contact_author_email       'michal.liberka@doctoral.uj.edu.pl'
_publ_contact_author_fax         ' '
_publ_contact_author_phone       ' '


# Insert blank lines between references

_publ_section_references
;
Blessing, R. H. (1995) Acta Cryst., A51, 33-38.

Blessing, R. H. (1987) Cryst. Rev. 1, 3-58.

Blessing, R. H. (1989) J. Appl. Cryst. 22, 396-397.

Bruker (2012) APEX2 (Version 2012.10-0), SAINT (version 8.27B), SADABS
(version 2012/1), BrukerAXS Inc, Madison, Wisconsin, USA.

ABSCOR: Higashi, T. (1995). ABSCOR. Rigaku Corporation, Tokyo, Japan.

CAD-4 Software: Enraf-Nonius (1989). CAD-4 Software (or CAD-4 EXPRESS).
Enraf-Nonius, Delft, The Netherlands.

Cambridge Structural Database: Allen, F. R. (2002). Acta Cryst. B58, 380-388.

CAMERON: Watkin, D. J., Prout, C. K. & Pearce, L. J. (1996). CAMERON.
Chemical Crystallography Laboratory, Oxford, England.

CrysAlis CCD, CrysAlis RED and associated programs: Oxford Diffraction (2006).
Program name(s). Oxford Diffraction Ltd, Abingdon, England.

CRYSTALS: Betteridge, P. W., Carruthers, J. R., Cooper, R. I., Prout, K. &
Watkin, D. J. (2003). J. Appl. Cryst. 36, 1487.

COLLECT: Nonius (1998). COLLECT. Nonius BV, Delft, The Netherlands.

DENZO/SCALEPACK:  Otwinowski, Z. & Minor, W. (1997). Methods in Enzymology,
Vol. 276, Macromolecular Crystallography, Part A, edited by C. W. Carter Jr
& R. M. Sweet, pp. 307-326. New York: Academic Press.

DIAMOND: Brandenburg, K.(2006). DIAMOND. Crystal Impact GbR, Bonn, Germany.

DIF4 and REDU4: Stoe & Cie (1991). Program name(s). Stoe & Cie, Darmstadt,
Germany.

DIFABS: Walker, N. &  Stuart, D. (1983). Acta Cryst., A39, 158 - 166.

DIRAX: Duisenberg, A. J. M. (1992). J. Appl. Cryst. 25, 92-96.

DIRDIF-2008: Beurskens, P.T., Beurskens, G., de Gelder, R., Garci\'ia-Granda,
S., Gould, R.O. & Smits, J.M.M. (2008) The DIRDIF-2008 program
system, Crystallography Laboratory, Radboud University  Nijmegen,
The Netherlands.

EDMA: Palatinus, L., Prathapa, S. J. & van Smaalen, S. (2012) J. Appl. Cryst.
45, 575-580.

enCIFer: Allen, F. H., Johnson, O., Shields, G. P., Smith, B. R. & Towler,
M. (2004). J. Appl. Cryst. 37, 335-338.

EVALCCD: Duisenberg, A. J. M., Kroon-Batenburg, L. M. J. & Schreurs,
A. M. M. (2003). J. Appl. Cryst. 36, 220-229.

JANA2000: Petricek, V. & Dusek, M. (2000). JANA2000. Institute of Physics,
Czech Academy of Sciences, Prague, Czech Republic.

MERCURY: Macrae, C. F., Bruno, I. J., Chisholm, J. A., Edgington,
P. R., McCabe, P., Pidcock, E., Rodriguez-Monge, L., Taylor, R.,
van de Streek, J. & Wood, P. A. (2008). J. Appl. Cryst. 41, 466-470.

MOGUL: Bruno, I. J., Cole, J. C., Kessler, M., Luo, J., Motherwell,
W. D. S., Purkis, L. H., Smith, B. R., Taylor, R., Cooper, R. I., Harris,
S. E. & Orpen, A. G. (2004). J. Chem. Inf. Comput. Sci. 44, 2133-2144.

ORTEPII: Johnson, C. K. (1976). ORTEPII. Report ORNL-5138. Oak Ridge
National Laboratory, Tennessee, USA.

ORTEPIII:  Burnett, M. N. & Johnson, C. K. (1996). ORTEPIII.
Report ORNL-6895. Oak Ridge National Laboratory, Tennessee, USA.

ORTEP-3: Farrugia, L. J. (2012). J. Appl. Cryst. 45, 849-854.

PARST: Nardelli, M. (1995). J. Appl. Cryst. 28, 659.

PLATON: Spek, A. L. (2009). Acta. Cryst. D65, 148-155.

PROCESS: Rigaku (1996). PROCESS. Rigaku Corporation, Tokyo, Japan.

PROCESS-AUTO: Rigaku (1998). PROCESS-AUTO. Rigaku Corporation, Tokyo, Japan.

PublCIF: Westrip, S. P. (2010). J. Appl. Cryst. 43, 920-925.

SCHAKAL: Keller, E. (1999) University of Freiburg, Germany.

SHELX: Sheldrick, G. M. (2008). Acta Cryst. A64, 112-122.

SHELXD: Schneider, T. R. & Sheldrick, G. M. (2002) Acta Cryst. D58, 1772-1779.

SIR92: Altomare, A., Cascarano, G., Giacovazzo, C., Guagliardi, A., Burla,
M. C., Polidori, G. & Camalli, M. (1994). J. Appl. Cryst. 27, 435.

SIR97: Altomare, A., Burla, M. C., Camalli, M., Cascarano, G. L.,
Giacovazzo, C., Guagliardi, A., Moliterni, A. G. G., Polidori, G. &
Spagna, R. (1999). J. Appl. Cryst. 32, 115-119.

SIR2002: Burla, M. C., Camalli, M., Carrozzini, B., Cascarano, G. L.,
Giacovazzo, C., Polidori, G. & Spagna, R. (2003). J. Appl. Cryst. 36, 1103.

SIR2004: Burla, M. C., Caliandro, R., Camalli, M., Carrozzini, B.,
Cascarano, G. L., De Caro, L., Giacovazzo, C., Polidori, G. & Spagna, R.
(2005). J. Appl. Cryst. 38, 381-388.

SIR2008 & IL MILIONE: Burla, M. C., Caliandro, R., Camalli, M., Carrozzini, B.,
Cascarano, G. L., De Caro, L., Giacovazzo, C., Polidori, G., Siliqi, D.,
& Spagna, R. (2007). J. Appl. Cryst. 40, 609-613.

SIR2011: Burla, M. C., Caliandro, R., Camalli, M., Carrozzini, B.,
Cascarano, G. L., Giacovazzo, C., Mallamo, M., Mazzone, A., Polidori, G.
& Spagna, R. (2012). J. Appl. Cryst. 45, 357-361.

SUPERFLIP: Palatinus, L. & Chapuis, G. (2007) J. Appl. Cryst. 40, 786-790.

TEXSAN: Molecular Structure Corporation & Rigaku (2000). TEXSAN. MSC,
The Woodlands, Texas, USA, and Rigaku Corporation, Tokyo, Japan.

WinGX: Farrugia, L. J. (2012). J. Appl. Cryst. 45, 849-854.

X-AREA, X-RED, X-RED32, X-SHAPE:  Stoe & Cie (2002). Program name(s).
Stoe & Cie GmbH, Darmstadt, Germany.

XCAD4: Harms, K. & Wocadlo, S. (1995). XCAD4. University of Marburg, Germany.

XSCANS: Siemens (1994). XSCANS. Siemens Analytical X-ray Instruments Inc.,
Madison, Wisconsin, USA.

;

#------------------  SECTION 2. COMPOUND(S) DETAILS -------------------------#

data_shelx

_audit_creation_date                    2021-03-11T13:57:55-00:00
_audit_creation_method                  'WinGX routine CIF_UPDATE'
_audit_conform_dict_name                cif_core.dic
_audit_conform_dict_version             2.4.5
_audit_conform_dict_location            ftp://ftp.iucr.org/pub/cif_core.dic
_publ_requested_category                FM

#----------------------------------------------------------------------------#
#                   CHEMICAL INFORMATION                                     #
#----------------------------------------------------------------------------#

_chemical_formula_moiety                'C72 H52 Fe2 N16 O4 Yb, 3(C F3 O3 S), 2(C3 H3 N)'
_chemical_formula_sum                   'C81 H58 F9 Fe2 N18 O13 S3 Yb'
_chemical_formula_weight                2043.37

#----------------------------------------------------------------------------#
#                   UNIT CELL INFORMATION                                    #
#----------------------------------------------------------------------------#

_symmetry_cell_setting                  monoclinic
_symmetry_space_group_name_H-M          'C 2/c'
_symmetry_space_group_name_Hall         '-C 2yc'
_symmetry_Int_Tables_number             15
loop_
    _symmetry_equiv_pos_as_xyz
'x, y, z'
'-x, y, -z+1/2'
'x+1/2, y+1/2, z'
'-x+1/2, y+1/2, -z+1/2'
'-x, -y, -z'
'x, -y, z-1/2'
'-x+1/2, -y+1/2, -z'
'x+1/2, -y+1/2, z-1/2'

_cell_length_a                          24.3976(12)
_cell_length_b                          21.9482(11)
_cell_length_c                          17.3099(8)
_cell_angle_alpha                       90
_cell_angle_beta                        111.8610(10)
_cell_angle_gamma                       90
_cell_volume                            8602.6(7)
_cell_formula_units_Z                   4
_cell_measurement_temperature           100)
_cell_measurement_reflns_used           43384
_cell_measurement_theta_min             2.247
_cell_measurement_theta_max             25.027
_cell_measurement_wavelength            0.71073

#----------------------------------------------------------------------------#
#                   CRYSTAL INFORMATION                                      #
#----------------------------------------------------------------------------#

_exptl_crystal_description              needle	
_exptl_crystal_colour                   red
_exptl_crystal_size_max                 0.14
_exptl_crystal_size_mid                 0.1
_exptl_crystal_size_min                 0.07
_exptl_crystal_density_diffrn           1.578
_exptl_crystal_density_method           'not measured'
_exptl_crystal_F_000                    4100

#----------------------------------------------------------------------------#
#                   ABSORPTION CORRECTION                                    #
#----------------------------------------------------------------------------#

_exptl_absorpt_coefficient_mu           1.575
_exptl_absorpt_correction_type          'multi-scan' 
_exptl_absorpt_correction_T_min         0.5623
_exptl_absorpt_correction_T_max         0.7531
_exptl_absorpt_process_details          'TWINABS (Sheldrick, 2009)' 

#----------------------------------------------------------------------------#
#                   DATA COLLECTION                                          #
#----------------------------------------------------------------------------#

_diffrn_ambient_temperature             100(2)
_diffrn_radiation_wavelength            0.71073
_diffrn_radiation_type                  MoK\a
_diffrn_radiation_probe                 x-ray
_diffrn_radiation_monochromator         graphite
_diffrn_measurement_device_type   	'D8Quest Eco Photon50' 
_diffrn_measurement_method       	 \w 
_diffrn_standards_number                0
_diffrn_standards_interval_time         0
_diffrn_standards_interval_count        0
_diffrn_standards_decay_%               0
_diffrn_reflns_av_R_equivalents         0.0761
_diffrn_reflns_av_unetI/netI            0.0619
_diffrn_reflns_number                   43384
_diffrn_reflns_limit_h_min              -29
_diffrn_reflns_limit_h_max              29
_diffrn_reflns_limit_k_min              -26
_diffrn_reflns_limit_k_max              26
_diffrn_reflns_limit_l_min              -20
_diffrn_reflns_limit_l_max              20
_diffrn_reflns_theta_min                2.247
_diffrn_reflns_theta_max                25.027
_diffrn_reflns_theta_full               25.027
_diffrn_measured_fraction_theta_full
                                        0.999
_diffrn_measured_fraction_theta_max
                                        0.999
_diffrn_reflns_Laue_measured_fraction_full
                                        0.999
_diffrn_reflns_Laue_measured_fraction_max
                                        0.999
_diffrn_reflns_point_group_measured_fraction_full
                                        0.999
_diffrn_reflns_point_group_measured_fraction_max
                                        0.999
_reflns_Friedel_coverage                0
_reflns_number_total                    7600
_reflns_number_gt                       5031
_reflns_threshold_expression            'I > 2\s(I)'

#----------------------------------------------------------------------------#
#                   COMPUTER PROGRAMS USED                                   #
#----------------------------------------------------------------------------#

_computing_structure_solution           'SHELXT 2018/2 (Sheldrick, 2018)'
_computing_structure_refinement         'SHELXL-2018/3 (Sheldrick, 2018)'
_computing_molecular_graphics           'Ortep for Windows (Farrugia, 2012)'
_computing_publication_material
                                   'WinGX publication routines (Farrugia, 2012)'

#----------------------------------------------------------------------------#
#                   STRUCTURE SOLUTION                                       #
#----------------------------------------------------------------------------#

_atom_sites_solution_hydrogens          geom

#----------------------------------------------------------------------------#
#                   REFINEMENT INFORMATION                                   #
#----------------------------------------------------------------------------#

_shelx_SHELXL_version_number            2018/3
_refine_ls_structure_factor_coef        Fsqd
_refine_ls_matrix_type                  full
_refine_ls_weighting_scheme             calc
_refine_ls_weighting_details
            'w=1/[\s^2^(Fo^2^)+(0.1398P)^2^+273.6933P] where P=(Fo^2^+2Fc^2^)/3'
_refine_ls_hydrogen_treatment           constr
_refine_ls_extinction_method            none
_refine_ls_number_reflns                7600
_refine_ls_number_parameters            613
_refine_ls_number_restraints            138
_refine_ls_number_constraints           0
_refine_ls_R_factor_all                 0.1417
_refine_ls_R_factor_gt                  0.099
_refine_ls_wR_factor_ref                0.2958
_refine_ls_wR_factor_gt                 0.2671
_refine_ls_goodness_of_fit_ref          1.055
_refine_ls_restrained_S_all             1.148
_refine_ls_shift/su_max                 0.027
_refine_ls_shift/su_mean                0
_refine_diff_density_max                3.07
_refine_diff_density_min                -1.973
_refine_diff_density_rms                0.21

# start Validation Reply Form 
_vrf_PLAT234_shelx           
;
RESPONSE: Due to the high structural disorder involving trimethanesulfonate anions,
it was necessary to model these molecules from residual electron densities
in the crystal strucutre and allowing all of them to be partially populated,
resulting in slightly large differences in anisotropic displacement parameters
of some neighbours atoms in trimethanesulfonate anion.
;
# end Validation Reply Form

# start Validation Reply Form 
_vrf_PLAT342_shelx           
;
RESPONSE: Low C-C bond precision can be caused by moderate structural
disorder involving trimethanesulfonate anions, which have been modeled
from residual electron densities in the crystal strucutre.
Alternatively, low C-C bond precision could be a result of the twinning
affecting in different degree spacially separated parts of the structure.  
;
# end Validation Reply Form

#----------------------------------------------------------------------------#
#                   CONSTRAINTS AND RESTRAINTS                               #
#----------------------------------------------------------------------------#


#----------------------------------------------------------------------------#
#                   ATOMIC TYPES, COORDINATES AND THERMAL PARAMETERS         #
#----------------------------------------------------------------------------#

loop_
    _atom_type_symbol
    _atom_type_description
    _atom_type_scat_dispersion_real
    _atom_type_scat_dispersion_imag
    _atom_type_scat_source
C C 0.0033 0.0016 'International Tables Vol C Tables 4.2.6.8 and 6.1.1.4'
H H 0 0 'International Tables Vol C Tables 4.2.6.8 and 6.1.1.4'
F F 0.0171 0.0103 'International Tables Vol C Tables 4.2.6.8 and 6.1.1.4'
Fe Fe 0.3463 0.8444 'International Tables Vol C Tables 4.2.6.8 and 6.1.1.4'
N N 0.0061 0.0033 'International Tables Vol C Tables 4.2.6.8 and 6.1.1.4'
O O 0.0106 0.006 'International Tables Vol C Tables 4.2.6.8 and 6.1.1.4'
S S 0.1246 0.1234 'International Tables Vol C Tables 4.2.6.8 and 6.1.1.4'
Yb Yb -0.385 5.5486 'International Tables Vol C Tables 4.2.6.8 and 6.1.1.4'

loop_
    _atom_site_label
    _atom_site_type_symbol
    _atom_site_fract_x
    _atom_site_fract_y
    _atom_site_fract_z
    _atom_site_U_iso_or_equiv
    _atom_site_adp_type
    _atom_site_occupancy
    _atom_site_site_symmetry_order
    _atom_site_calc_flag
    _atom_site_refinement_flags_posn
    _atom_site_refinement_flags_adp
    _atom_site_refinement_flags_occupancy
    _atom_site_disorder_assembly
    _atom_site_disorder_group
Fe1 Fe 0.15226(8) 0.25450(8) 0.17362(11) 0.0380(5) Uani 1 1 d . . . . .
O2 O 0.3270(4) 0.2563(4) 0.4634(7) 0.058(3) Uani 1 1 d . . . . .
O1 O 0.2453(5) 0.1540(5) 0.4741(8) 0.071(3) Uani 1 1 d . . . . .
N1 N 0.1906(4) 0.2668(5) 0.3611(7) 0.040(2) Uani 1 1 d . . . . .
C26 C 0.2736(6) 0.1998(6) 0.2483(9) 0.042(3) Uani 1 1 d . . . . .
H26 H 0.274245 0.211372 0.300263 0.05 Uiso 1 1 calc R U . . .
N6 N 0.2263(4) 0.2145(4) 0.1811(6) 0.035(2) Uani 1 1 d . . . . .
N4 N 0.1145(4) 0.1735(5) 0.1745(6) 0.038(2) Uani 1 1 d . . . . .
N2 N 0.1998(5) 0.3825(5) 0.1685(7) 0.049(3) Uani 1 1 d . . . . .
C1 C 0.1749(5) 0.2628(5) 0.2897(9) 0.035(3) Uani 1 1 d . . . . .
N3 N 0.0717(4) 0.2823(5) 0.1547(6) 0.038(2) Uani 1 1 d . . . . .
C25 C 0.3220(5) 0.1679(6) 0.2444(9) 0.040(3) Uani 1 1 d . . . . .
H25 H 0.35361 0.158238 0.293025 0.048 Uiso 1 1 calc R U . . .
N5 N 0.1344(5) 0.2438(5) 0.0524(7) 0.045(3) Uani 1 1 d . . . . .
C2 C 0.1811(5) 0.3350(6) 0.1701(8) 0.037(3) Uani 1 1 d . . . . .
N7 N 0.2849(8) -0.0031(6) 0.3844(8) 0.071(4) Uani 1 1 d . . . . .
H7 H 0.2919 -0.036902 0.364641 0.086 Uiso 1 1 calc R U . . .
C14 C 0.1393(6) 0.1181(6) 0.1908(8) 0.043(3) Uani 1 1 d . . . . .
H14 H 0.179651 0.114308 0.203555 0.052 Uiso 1 1 calc R U . . .
C24 C 0.3226(6) 0.1514(6) 0.1705(10) 0.053(4) Uani 1 1 d . . . . .
H24 H 0.354877 0.130242 0.167837 0.064 Uiso 1 1 calc R U . . .
C11 C 0.0562(5) 0.1785(6) 0.1600(7) 0.036(3) Uani 1 1 d . . . . .
C21 C 0.2702(7) 0.1502(7) 0.0137(10) 0.054(4) Uani 1 1 d . . . . .
H21 H 0.300205 0.12773 0.006345 0.064 Uiso 1 1 calc R U . . .
C7 C 0.0326(5) 0.2370(5) 0.1497(7) 0.035(3) Uani 1 1 d . . . . .
C32 C 0.3526(6) 0.2891(7) 0.4240(9) 0.054(4) Uani 1 1 d . . . . .
C13 C 0.1056(6) 0.0647(6) 0.1894(9) 0.052(4) Uani 1 1 d . . . . .
H13 H 0.12365 0.026672 0.199582 0.063 Uiso 1 1 calc R U . . .
C4 C -0.0088(6) 0.3532(7) 0.1314(9) 0.047(3) Uani 1 1 d . . . . .
H4 H -0.021986 0.393282 0.125536 0.057 Uiso 1 1 calc R U . . .
C10 C 0.0204(5) 0.1268(7) 0.1576(8) 0.042(3) Uani 1 1 d . . . . .
C33 C 0.4039(8) 0.2733(8) 0.4154(10) 0.065(4) Uani 1 1 d . . . . .
H33 H 0.422451 0.237203 0.439546 0.078 Uiso 1 1 calc R U . . .
C22 C 0.2744(7) 0.1657(6) 0.0960(10) 0.052(4) Uani 1 1 d . . . . .
C23 C 0.2273(5) 0.1969(6) 0.1058(8) 0.036(3) Uani 1 1 d . . . . .
C19 C 0.1771(6) 0.2151(6) 0.0364(8) 0.044(3) Uani 1 1 d . . . . .
C27 C 0.2579(7) 0.1034(6) 0.4441(9) 0.051(4) Uani 1 1 d . . . . .
C6 C -0.0271(6) 0.2459(7) 0.1360(8) 0.046(3) Uani 1 1 d . . . . .
C15 C 0.0881(7) 0.2648(7) -0.0138(9) 0.052(4) Uani 1 1 d . . . . .
H15 H 0.059377 0.28821 -0.004552 0.063 Uiso 1 1 calc R U . . .
C9 C -0.0407(6) 0.1381(7) 0.1413(9) 0.048(3) Uani 1 1 d . . . . .
H9 H -0.065466 0.104995 0.136812 0.058 Uiso 1 1 calc R U . . .
C12 C 0.0468(6) 0.0701(7) 0.1729(8) 0.049(3) Uani 1 1 d . . . . .
H12 H 0.02442 0.035601 0.171933 0.058 Uiso 1 1 calc R U . . .
C28 C 0.2185(9) 0.0576(8) 0.4211(11) 0.076(5) Uani 1 1 d . . . . .
H28 H 0.181697 0.061617 0.424987 0.091 Uiso 1 1 calc R U . . .
C31 C 0.3125(8) 0.0964(8) 0.4373(10) 0.068(5) Uani 1 1 d . . . . .
H31 H 0.339982 0.127854 0.452355 0.081 Uiso 1 1 calc R U . . .
C20 C 0.2229(7) 0.1680(8) -0.0538(10) 0.059(4) Uani 1 1 d . . . . .
H20 H 0.221992 0.159082 -0.106842 0.07 Uiso 1 1 calc R U . . .
N1S N 0.7302(8) 0.4925(8) 0.6778(12) 0.096(6) Uani 1 1 d . . . . .
C8 C -0.0636(6) 0.1935(7) 0.1323(8) 0.050(4) Uani 1 1 d . . . . .
H8 H -0.103322 0.198665 0.123535 0.06 Uiso 1 1 calc R U . . .
N8 N 0.4032(8) 0.3574(7) 0.3384(11) 0.090(5) Uani 1 1 d . . . . .
H8A H 0.419584 0.378153 0.310675 0.108 Uiso 1 1 calc R U . . .
C29 C 0.2336(9) 0.0050(8) 0.3917(10) 0.070(5) Uani 1 1 d . . . . .
H29 H 0.206321 -0.02667 0.376218 0.084 Uiso 1 1 calc R U . . .
C34 C 0.4279(8) 0.3064(9) 0.3751(11) 0.074(5) Uani 1 1 d . . . . .
H34 H 0.463398 0.29395 0.371864 0.089 Uiso 1 1 calc R U . . .
C3 C 0.0507(6) 0.3407(6) 0.1451(8) 0.049(4) Uani 1 1 d . . . . .
H3 H 0.076252 0.372851 0.147809 0.058 Uiso 1 1 calc R U . . .
C36 C 0.3265(10) 0.3427(9) 0.3853(19) 0.122(10) Uani 1 1 d . . . . .
H36 H 0.290699 0.355324 0.387441 0.147 Uiso 1 1 calc R U . . .
C5 C -0.0465(6) 0.3080(7) 0.1266(8) 0.049(4) Uani 1 1 d . . . . .
H5 H -0.085759 0.316898 0.117081 0.059 Uiso 1 1 calc R U . . .
C30 C 0.3257(10) 0.0397(8) 0.4068(11) 0.078(5) Uani 1 1 d . . . . .
H30 H 0.362289 0.033285 0.402803 0.094 Uiso 1 1 calc R U . . .
C18 C 0.1748(7) 0.1998(7) -0.0452(9) 0.052(4) Uani 1 1 d . . . . .
C16 C 0.0825(8) 0.2522(9) -0.0959(10) 0.074(5) Uani 1 1 d . . . . .
H16 H 0.04898 0.265181 -0.139842 0.089 Uiso 1 1 calc R U . . .
C17 C 0.1247(7) 0.2219(8) -0.1120(9) 0.057(4) Uani 1 1 d . . . . .
H17 H 0.121171 0.215236 -0.166701 0.069 Uiso 1 1 calc R U . . .
C35 C 0.3538(12) 0.3769(10) 0.3436(19) 0.122(10) Uani 1 1 d . . . . .
H35 H 0.337408 0.413727 0.319225 0.146 Uiso 1 1 calc R U . . .
Yb1 Yb 0.2499(5) 0.2507(7) 0.4904(4) 0.0233(9) Uani 0.5 1 d . . P . .
C1A C 0.0429(8) 0.4450(10) -0.0801(15) 0.17(2) Uani 0.6 1 d D U P A 1
S1A S -0.0253(5) 0.4017(6) -0.1259(10) 0.166(5) Uani 0.6 1 d D U P A 1
F3A F 0.0322(13) 0.4839(16) -0.030(2) 0.472(3) Uani 0.6 1 d D U P A 1
F2A F 0.0493(11) 0.4767(14) -0.1394(19) 0.237(15) Uani 0.6 1 d D U P A 1
F1A F 0.0864(8) 0.4121(11) -0.0418(15) 0.144(9) Uani 0.6 1 d D U P A 1
O3A O -0.0692(8) 0.4440(11) -0.1688(17) 0.199(14) Uani 0.6 1 d D U P A 1
O2A O -0.0235(13) 0.3621(13) -0.1877(16) 0.194(17) Uani 0.6 1 d D U P A 1
O1A O -0.0406(11) 0.3701(12) -0.0720(14) 0.133(10) Uani 0.6 1 d D U P A 1
O4A O 0.5962(8) 0.4025(9) 0.3280(11) 0.157(8) Uani 0.9 1 d D U P B 2
O5A O 0.5072(5) 0.4285(8) 0.3358(10) 0.119(6) Uani 0.9 1 d D U P B 2
O6A O 0.5820(10) 0.4979(7) 0.3535(10) 0.176(9) Uani 0.9 1 d D U P B 2
C2A C 0.5977(8) 0.4397(9) 0.4790(8) 0.114(9) Uani 0.9 1 d D U P B 2
F4A F 0.6537(7) 0.4416(10) 0.5076(11) 0.184(8) Uani 0.9 1 d D U P B 2
S2A S 0.5691(4) 0.4435(4) 0.3627(5) 0.126(3) Uani 0.9 1 d D U P B 2
F6A F 0.5723(10) 0.3927(8) 0.4805(11) 0.233(12) Uani 0.9 1 d D U P B 2
F5A F 0.5752(8) 0.4842(8) 0.5079(9) 0.161(7) Uani 0.9 1 d D U P B 2
C2S C 0.8336(13) 0.5191(12) 0.684(2) 0.148(13) Uani 1 1 d . . . C 1
H2S H 0.861061 0.487911 0.704389 0.178 Uiso 1 1 calc R U . C 1
C3S C 0.8484(14) 0.5655(12) 0.6693(17) 0.125(10) Uani 1 1 d . . . C 1
H3S3 H 0.821001 0.596692 0.648953 0.15 Uiso 1 1 calc R U . C 1
H3S4 H 0.887852 0.572108 0.677663 0.15 Uiso 1 1 calc R U . C 1
C1S C 0.7722(10) 0.5086(11) 0.6711(14) 0.092(6) Uani 1 1 d . . . C 1

loop_
    _atom_site_aniso_label
    _atom_site_aniso_U_11
    _atom_site_aniso_U_22
    _atom_site_aniso_U_33
    _atom_site_aniso_U_23
    _atom_site_aniso_U_13
    _atom_site_aniso_U_12
Fe1 0.0354(9) 0.0404(10) 0.0446(10) 0.0109(9) 0.0223(8) 0.0076(8)
O2 0.050(6) 0.053(6) 0.074(7) 0.003(5) 0.028(5) 0.004(5)
O1 0.077(8) 0.046(6) 0.087(8) -0.013(5) 0.027(7) 0.002(5)
N1 0.027(5) 0.053(7) 0.040(6) 0.005(5) 0.014(5) 0.000(4)
C26 0.046(8) 0.040(7) 0.048(8) 0.004(6) 0.029(7) 0.000(6)
N6 0.030(5) 0.035(6) 0.046(6) 0.003(5) 0.023(5) 0.003(4)
N4 0.034(6) 0.048(6) 0.036(6) 0.012(5) 0.019(5) 0.006(5)
N2 0.059(8) 0.043(7) 0.060(8) 0.013(6) 0.040(6) -0.001(6)
C1 0.023(6) 0.030(7) 0.057(9) 0.008(5) 0.022(6) 0.000(4)
N3 0.034(6) 0.046(6) 0.038(6) 0.009(5) 0.019(5) 0.015(5)
C25 0.026(6) 0.043(7) 0.055(8) 0.002(6) 0.019(6) 0.005(5)
N5 0.040(6) 0.053(7) 0.048(6) 0.010(5) 0.024(5) -0.002(5)
C2 0.029(6) 0.053(8) 0.040(7) 0.008(6) 0.025(6) 0.007(6)
N7 0.129(14) 0.038(7) 0.059(8) -0.004(6) 0.048(9) 0.021(8)
C14 0.035(7) 0.052(8) 0.048(8) 0.014(6) 0.022(6) 0.007(6)
C24 0.029(7) 0.051(8) 0.085(11) 0.006(8) 0.028(7) 0.010(6)
C11 0.025(6) 0.053(8) 0.032(7) 0.001(6) 0.014(5) -0.003(5)
C21 0.055(9) 0.069(10) 0.065(10) -0.010(8) 0.054(8) -0.012(7)
C7 0.035(6) 0.041(8) 0.030(6) 0.008(5) 0.013(5) 0.009(5)
C32 0.047(9) 0.063(10) 0.052(9) 0.005(7) 0.019(7) -0.008(7)
C13 0.051(9) 0.043(8) 0.067(10) 0.012(7) 0.026(7) -0.005(6)
C4 0.034(7) 0.062(9) 0.054(9) 0.013(7) 0.025(7) 0.021(7)
C10 0.023(6) 0.069(9) 0.034(7) 0.008(6) 0.010(5) -0.003(6)
C33 0.071(12) 0.065(10) 0.055(10) -0.001(8) 0.018(9) 0.010(9)
C22 0.062(10) 0.046(8) 0.071(10) -0.010(7) 0.050(9) -0.011(7)
C23 0.027(6) 0.046(7) 0.045(7) 0.000(6) 0.024(6) -0.007(5)
C19 0.050(8) 0.048(8) 0.042(8) 0.000(6) 0.025(7) -0.017(6)
C27 0.073(11) 0.038(8) 0.050(9) 0.017(6) 0.033(8) 0.020(7)
C6 0.039(7) 0.068(9) 0.037(7) 0.007(7) 0.020(5) 0.015(7)
C15 0.054(9) 0.057(10) 0.048(9) 0.016(6) 0.021(7) 0.001(7)
C9 0.036(7) 0.056(9) 0.057(9) 0.007(7) 0.023(7) 0.002(6)
C12 0.046(8) 0.055(9) 0.050(8) -0.001(7) 0.023(7) -0.008(7)
C28 0.079(13) 0.058(11) 0.085(13) 0.008(9) 0.025(11) 0.006(9)
C31 0.086(13) 0.068(11) 0.050(9) -0.001(8) 0.026(9) -0.023(9)
C20 0.070(11) 0.083(11) 0.042(9) -0.001(8) 0.044(8) -0.019(9)
N1S 0.082(12) 0.092(12) 0.131(16) -0.010(11) 0.060(12) -0.019(10)
C8 0.026(7) 0.094(12) 0.042(8) 0.012(7) 0.026(6) 0.008(7)
N8 0.114(14) 0.079(11) 0.125(14) 0.020(10) 0.100(13) 0.010(10)
C29 0.106(15) 0.053(10) 0.048(9) -0.016(7) 0.024(10) 0.012(9)
C34 0.069(12) 0.105(15) 0.068(11) 0.002(10) 0.048(10) 0.028(11)
C3 0.056(9) 0.047(8) 0.047(8) 0.015(6) 0.025(7) 0.018(7)
C36 0.106(17) 0.059(12) 0.26(3) 0.018(16) 0.13(2) 0.015(11)
C5 0.036(8) 0.075(10) 0.047(8) 0.014(7) 0.027(6) 0.022(7)
C30 0.113(16) 0.059(11) 0.075(12) 0.003(9) 0.051(12) 0.014(11)
C18 0.064(10) 0.062(9) 0.049(9) -0.005(7) 0.041(8) -0.021(7)
C16 0.061(10) 0.111(15) 0.046(9) 0.029(10) 0.015(8) -0.007(10)
C17 0.049(9) 0.089(11) 0.034(8) 0.001(7) 0.014(7) -0.016(8)
C35 0.14(2) 0.060(13) 0.20(3) 0.047(15) 0.11(2) 0.021(13)
Yb1 0.0285(4) 0.0268(7) 0.020(3) -0.002(3) 0.015(2) 0.0019(4)
C1A 0.16(2) 0.16(2) 0.17(2) 0.007(10) 0.057(12) -0.002(10)
S1A 0.121(8) 0.142(8) 0.196(9) 0.057(8) 0.014(7) 0.000(7)
F3A 0.472(3) 0.472(3) 0.472(3) 0.00000(10) 0.1756(10) 0.00000(10)
F2A 0.237(15) 0.237(15) 0.237(15) 0.0001(10) 0.088(6) -0.0001(10)
F1A 0.123(12) 0.133(12) 0.158(12) 0.008(9) 0.032(9) 0.001(9)
O3A 0.199(14) 0.199(14) 0.199(14) 0.0001(10) 0.074(5) 0.0000(10)
O2A 0.186(19) 0.200(19) 0.193(19) -0.013(10) 0.068(11) 0.018(10)
O1A 0.126(13) 0.138(13) 0.131(13) 0.031(9) 0.043(9) -0.025(9)
O4A 0.164(11) 0.162(11) 0.160(11) -0.043(8) 0.078(9) 0.047(8)
O5A 0.082(8) 0.137(10) 0.137(10) 0.000(8) 0.040(7) -0.022(7)
O6A 0.181(12) 0.159(12) 0.196(13) 0.015(9) 0.078(9) -0.032(9)
C2A 0.111(12) 0.119(12) 0.118(12) -0.011(9) 0.049(9) -0.003(9)
F4A 0.177(11) 0.185(12) 0.181(11) 0.002(9) 0.058(9) -0.005(9)
S2A 0.130(6) 0.127(6) 0.129(6) 0.024(5) 0.058(5) 0.025(5)
F6A 0.239(14) 0.237(15) 0.235(14) -0.016(9) 0.103(10) -0.011(9)
F5A 0.175(11) 0.155(10) 0.160(10) 0.001(8) 0.069(8) 0.014(8)
C2S 0.13(2) 0.075(17) 0.27(4) 0.01(2) 0.11(3) 0.004(16)
C3S 0.17(3) 0.085(17) 0.16(2) 0.016(16) 0.10(2) -0.015(17)
C1S 0.075(15) 0.103(16) 0.100(16) -0.004(13) 0.036(13) -0.001(12)


#----------------------------------------------------------------------------#
#                   MOLECULAR GEOMETRY                                       #
#----------------------------------------------------------------------------#

_geom_special_details
;
 All esds (except the esd in the dihedral angle between two l.s. planes)
 are estimated using the full covariance matrix.  The cell esds are taken
 into account individually in the estimation of esds in distances, angles
 and torsion angles; correlations between esds in cell parameters are only
 used when they are defined by crystal symmetry.  An approximate (isotropic)
 treatment of cell esds is used for estimating esds involving l.s. planes.
;
loop_
    _geom_bond_atom_site_label_1
    _geom_bond_atom_site_label_2
    _geom_bond_distance
    _geom_bond_site_symmetry_2
    _geom_bond_publ_flag
Fe1 C1 1.883(15) . ?
Fe1 C2 1.911(14) . ?
Fe1 N3 1.966(10) . ?
Fe1 N6 1.970(9) . ?
Fe1 N5 1.991(11) . ?
Fe1 N4 2.005(11) . ?
O2 C32 1.300(17) . ?
O2 Yb1 2.104(14) . ?
O2 Yb1 2.304(13) 7_556 ?
O1 C27 1.310(17) . ?
O1 Yb1 2.138(19) . ?
O1 Yb1 2.171(19) 7_556 ?
N1 C1 1.154(16) . ?
N1 Yb1 2.194(14) . ?
N1 Yb1 2.466(14) 7_556 ?
C26 N6 1.337(16) . ?
C26 C25 1.395(17) . ?
N6 C23 1.367(15) . ?
N4 C14 1.340(16) . ?
N4 C11 1.354(15) . ?
N2 C2 1.141(16) . ?
N3 C7 1.358(16) . ?
N3 C3 1.367(16) . ?
C25 C24 1.335(19) . ?
N5 C19 1.332(17) . ?
N5 C15 1.355(18) . ?
N7 C30 1.32(2) . ?
N7 C29 1.32(2) . ?
C14 C13 1.425(18) . ?
C24 C22 1.42(2) . ?
C11 C7 1.392(17) . ?
C11 C10 1.422(18) . ?
C21 C20 1.36(2) . ?
C21 C22 1.43(2) . ?
C7 C6 1.401(17) . ?
C32 C33 1.36(2) . ?
C32 C36 1.39(3) . ?
C13 C12 1.359(19) . ?
C4 C5 1.33(2) . ?
C4 C3 1.408(18) . ?
C10 C12 1.381(19) . ?
C10 C9 1.434(18) . ?
C33 C34 1.29(2) . ?
C22 C23 1.402(18) . ?
C23 C19 1.416(18) . ?
C19 C18 1.434(18) . ?
C27 C28 1.34(2) . ?
C27 C31 1.39(2) . ?
C6 C5 1.432(19) . ?
C6 C8 1.44(2) . ?
C15 C16 1.40(2) . ?
C9 C8 1.32(2) . ?
C28 C29 1.37(2) . ?
C31 C30 1.44(2) . ?
C20 C18 1.42(2) . ?
N1S C1S 1.13(2) . ?
N8 C35 1.31(3) . ?
N8 C34 1.32(2) . ?
C36 C35 1.37(3) . ?
C18 C17 1.42(2) . ?
C16 C17 1.34(2) . ?
Yb1 Yb1 0.333(12) 7_556 ?
C1A F1A 1.249(16) . ?
C1A F2A 1.297(17) . ?
C1A F3A 1.310(18) . ?
C1A S1A 1.822(14) . ?
S1A O1A 1.322(14) . ?
S1A O2A 1.391(15) . ?
S1A O3A 1.404(15) . ?
O4A S2A 1.382(12) . ?
O5A S2A 1.443(12) . ?
O6A S2A 1.259(12) . ?
C2A F6A 1.209(15) . ?
C2A F4A 1.269(15) . ?
C2A F5A 1.308(15) . ?
C2A S2A 1.870(13) . ?
C2S C3S 1.14(3) . ?
C2S C1S 1.45(3) . ?

loop_
    _geom_angle_atom_site_label_1
    _geom_angle_atom_site_label_2
    _geom_angle_atom_site_label_3
    _geom_angle
    _geom_angle_site_symmetry_1
    _geom_angle_site_symmetry_3
    _geom_angle_publ_flag
C1 Fe1 C2 88.8(5) . . ?
C1 Fe1 N3 91.5(4) . . ?
C2 Fe1 N3 93.7(5) . . ?
C1 Fe1 N6 94.3(5) . . ?
C2 Fe1 N6 94.3(4) . . ?
N3 Fe1 N6 170.2(5) . . ?
C1 Fe1 N5 175.8(5) . . ?
C2 Fe1 N5 90.8(5) . . ?
N3 Fe1 N5 92.7(4) . . ?
N6 Fe1 N5 81.5(4) . . ?
C1 Fe1 N4 91.8(4) . . ?
C2 Fe1 N4 174.6(5) . . ?
N3 Fe1 N4 81.0(4) . . ?
N6 Fe1 N4 91.0(4) . . ?
N5 Fe1 N4 89.0(4) . . ?
C32 O2 Yb1 142.5(10) . . ?
C32 O2 Yb1 146.3(10) . 7_556 ?
Yb1 O2 Yb1 6.9(4) . 7_556 ?
C27 O1 Yb1 152.3(11) . . ?
C27 O1 Yb1 159.0(11) . 7_556 ?
Yb1 O1 Yb1 8.8(3) . 7_556 ?
C1 N1 Yb1 155.5(10) . . ?
C1 N1 Yb1 159.5(10) . 7_556 ?
Yb1 N1 Yb1 4.7(5) . 7_556 ?
N6 C26 C25 123.4(12) . . ?
C26 N6 C23 116.5(10) . . ?
C26 N6 Fe1 129.6(8) . . ?
C23 N6 Fe1 113.8(8) . . ?
C14 N4 C11 118.2(11) . . ?
C14 N4 Fe1 129.4(9) . . ?
C11 N4 Fe1 112.4(8) . . ?
N1 C1 Fe1 177.7(10) . . ?
C7 N3 C3 117.2(11) . . ?
C7 N3 Fe1 114.7(8) . . ?
C3 N3 Fe1 128.1(10) . . ?
C24 C25 C26 119.6(13) . . ?
C19 N5 C15 117.0(12) . . ?
C19 N5 Fe1 113.2(9) . . ?
C15 N5 Fe1 129.6(10) . . ?
N2 C2 Fe1 178.2(11) . . ?
C30 N7 C29 121.2(15) . . ?
N4 C14 C13 122.0(12) . . ?
C25 C24 C22 120.6(12) . . ?
N4 C11 C7 117.0(11) . . ?
N4 C11 C10 122.2(12) . . ?
C7 C11 C10 120.8(11) . . ?
C20 C21 C22 120.8(14) . . ?
N3 C7 C11 114.9(11) . . ?
N3 C7 C6 124.8(11) . . ?
C11 C7 C6 120.3(12) . . ?
O2 C32 C33 123.9(15) . . ?
O2 C32 C36 119.9(15) . . ?
C33 C32 C36 116.1(15) . . ?
C12 C13 C14 119.3(13) . . ?
C5 C4 C3 120.7(13) . . ?
C12 C10 C11 118.4(11) . . ?
C12 C10 C9 124.8(13) . . ?
C11 C10 C9 116.8(13) . . ?
C34 C33 C32 122.5(17) . . ?
C23 C22 C24 115.9(13) . . ?
C23 C22 C21 118.6(15) . . ?
C24 C22 C21 125.4(14) . . ?
N6 C23 C22 123.9(12) . . ?
N6 C23 C19 114.4(11) . . ?
C22 C23 C19 121.6(12) . . ?
N5 C19 C23 117.0(11) . . ?
N5 C19 C18 124.7(13) . . ?
C23 C19 C18 118.3(13) . . ?
O1 C27 C28 120.4(15) . . ?
O1 C27 C31 120.0(15) . . ?
C28 C27 C31 119.6(15) . . ?
C7 C6 C5 115.5(13) . . ?
C7 C6 C8 118.9(12) . . ?
C5 C6 C8 125.6(12) . . ?
N5 C15 C16 121.7(15) . . ?
C8 C9 C10 123.1(14) . . ?
C13 C12 C10 119.9(13) . . ?
C27 C28 C29 118.8(18) . . ?
C27 C31 C30 118.8(16) . . ?
C21 C20 C18 121.4(13) . . ?
C9 C8 C6 120.1(12) . . ?
C35 N8 C34 120.7(16) . . ?
N7 C29 C28 123.2(18) . . ?
C33 C34 N8 121.5(16) . . ?
N3 C3 C4 121.2(14) . . ?
C35 C36 C32 119.5(18) . . ?
C4 C5 C6 120.6(12) . . ?
N7 C30 C31 118.5(18) . . ?
C17 C18 C20 125.3(13) . . ?
C17 C18 C19 115.3(14) . . ?
C20 C18 C19 119.3(14) . . ?
C17 C16 C15 121.0(15) . . ?
C16 C17 C18 119.8(14) . . ?
N8 C35 C36 119.7(19) . . ?
Yb1 Yb1 O2 123(4) 7_556 . ?
Yb1 Yb1 O1 91(6) 7_556 . ?
O2 Yb1 O1 92.1(6) . . ?
Yb1 Yb1 O1 80(5) 7_556 7_556 ?
O2 Yb1 O1 92.8(7) . 7_556 ?
O1 Yb1 O1 171.2(3) . 7_556 ?
Yb1 Yb1 N1 142(4) 7_556 . ?
O2 Yb1 N1 94.0(5) . . ?
O1 Yb1 N1 92.5(6) . . ?
O1 Yb1 N1 94.5(7) 7_556 . ?
Yb1 Yb1 O2 50(4) 7_556 7_556 ?
O2 Yb1 O2 173.1(4) . 7_556 ?
O1 Yb1 O2 88.2(6) . 7_556 ?
O1 Yb1 O2 86.0(6) 7_556 7_556 ?
N1 Yb1 O2 92.9(6) . 7_556 ?
Yb1 Yb1 N1 33(4) 7_556 7_556 ?
O2 Yb1 N1 90.8(5) . 7_556 ?
O1 Yb1 N1 87.9(6) . 7_556 ?
O1 Yb1 N1 84.6(5) 7_556 7_556 ?
N1 Yb1 N1 175.3(5) . 7_556 ?
O2 Yb1 N1 82.3(4) 7_556 7_556 ?
F1A C1A F2A 113.6(17) . . ?
F1A C1A F3A 111.4(17) . . ?
F2A C1A F3A 106.6(18) . . ?
F1A C1A S1A 112.8(14) . . ?
F2A C1A S1A 107.2(13) . . ?
F3A C1A S1A 104.7(13) . . ?
O1A S1A O2A 108.3(14) . . ?
O1A S1A O3A 111.1(14) . . ?
O2A S1A O3A 104.0(14) . . ?
O1A S1A C1A 114.7(13) . . ?
O2A S1A C1A 112.1(13) . . ?
O3A S1A C1A 106.2(10) . . ?
F6A C2A F4A 120.3(18) . . ?
F6A C2A F5A 109.8(16) . . ?
F4A C2A F5A 111.8(15) . . ?
F6A C2A S2A 94.2(11) . . ?
F4A C2A S2A 109.5(12) . . ?
F5A C2A S2A 109.7(11) . . ?
O6A S2A O4A 112.2(12) . . ?
O6A S2A O5A 117.2(12) . . ?
O4A S2A O5A 108.9(11) . . ?
O6A S2A C2A 99.7(9) . . ?
O4A S2A C2A 113.1(10) . . ?
O5A S2A C2A 105.3(9) . . ?
C3S C2S C1S 120(3) . . ?
N1S C1S C2S 164(3) . . ?

_iucr_refine_instructions_details
;
TITL MLKS339_0m_a.res in C2/c
    shelx.res
    created by SHELXL-2018/3 at 13:56:40 on 11-Mar-2021
CELL  0.71073  24.3976  21.9482  17.3099   90.000  111.861   90.000
ZERR     4.00   0.0012   0.0011   0.0008    0.000    0.001    0.000
LATT   7
SYMM  - X,   Y, 1/2 - Z
SFAC  C    H    F    FE   N    O    S    YB
UNIT  324 232 36 8 72 52 12 4
MERG   2
DFIX  1.7 S2A C2A
DFIX 1.3 c2a f4a
DFIX 1.3 c2a f5a
DFIX 1.3 c2a f6a
DFIX 1.4 s2a o4a
DFIX 1.4 s2a o5a
DFIX 1.4 s2a o6a
DFIX 2.1 f4a f5a
DFIX 2.1 f4a f6a
DFIX 2.1 f5a f6a
DFIX 2.2 o4a o5a
DFIX 2.2 o4a o6a
DFIX 2.2 o5a o6a
DFIX 2.8 o6a f6a
DFIX 2.8 o6a f5a
DFIX 2.6 s2a f4a
DFIX 2.6 s2a f5a
DFIX 2.6 s2a f6a
DFIX 2.7 c2a o4a
DFIX 2.7 c2a o5a
DFIX 2.7 c2a o6a
DFIX  1.7 S1A C1A
DFIX 1.3 c1a f1a
DFIX 1.3 c1a f2a
DFIX 1.3 c1a f3a
DFIX 1.4 s1a o1a
DFIX 1.4 s1a o2a
DFIX 1.4 s1a o3a
DFIX 2.1 f1a f2a
DFIX 2.1 f1a f3a
DFIX 2.1 f2a f3a
DFIX 2.2 o1a o2a
DFIX 2.2 o1a o3a
DFIX 2.2 o2a o3a
DFIX 2.8 o3a f3a
DFIX 2.8 o3a f2a
DFIX 2.6 s1a f1a
DFIX 2.6 s1a f2a
DFIX 2.6 s1a f3a
DFIX 2.7 c1a o1a
DFIX 2.7 c1a o2a
DFIX 2.7 c1a o3a
ISOR 0.01 0.01 c1a f1a
ISOR 0.01 0.01 s1a o1a o2a
ISOR 0.01 0.01 c2a f4a f5a f6a
ISOR 0.01 0.01 s2a o4a o5a o6a
ISOR 0.001 0.001 f2a o3a
ISOR 0.0001 0.0001 f3a
FMAP   2
PLAN   60
ACTA
BOND
LIST   4
L.S.   150
TEMP    23.00
WGHT    0.139800  273.693298
FVAR       0.10211
FE1   4    0.152259    0.254497    0.173622    11.00000    0.03537    0.04039 =
         0.04461    0.01091    0.02233    0.00764
O2    6    0.327019    0.256335    0.463370    11.00000    0.05028    0.05350 =
         0.07429    0.00342    0.02755    0.00394
O1    6    0.245317    0.154016    0.474129    11.00000    0.07660    0.04602 =
         0.08676   -0.01261    0.02677    0.00226
N1    5    0.190595    0.266846    0.361141    11.00000    0.02671    0.05338 =
         0.03997    0.00463    0.01383   -0.00043
C26   1    0.273602    0.199764    0.248262    11.00000    0.04601    0.04032 =
         0.04808    0.00387    0.02857    0.00028
AFIX  43
H26   2    0.274245    0.211372    0.300263    11.00000   -1.20000
AFIX   0
N6    5    0.226344    0.214491    0.181078    11.00000    0.03003    0.03515 =
         0.04645    0.00274    0.02280    0.00266
N4    5    0.114524    0.173478    0.174483    11.00000    0.03394    0.04841 =
         0.03593    0.01179    0.01859    0.00563
N2    5    0.199758    0.382469    0.168453    11.00000    0.05875    0.04310 =
         0.06036    0.01304    0.03962   -0.00132
C1    1    0.174917    0.262757    0.289680    11.00000    0.02334    0.03006 =
         0.05745    0.00808    0.02173    0.00047
N3    5    0.071684    0.282329    0.154679    11.00000    0.03442    0.04601 =
         0.03838    0.00909    0.01927    0.01524
C25   1    0.321978    0.167903    0.244421    11.00000    0.02614    0.04323 =
         0.05478    0.00155    0.01887    0.00539
AFIX  43
H25   2    0.353610    0.158238    0.293025    11.00000   -1.20000
AFIX   0
N5    5    0.134355    0.243773    0.052421    11.00000    0.03993    0.05300 =
         0.04831    0.01011    0.02362   -0.00158
C2    1    0.181074    0.335022    0.170117    11.00000    0.02861    0.05348 =
         0.04044    0.00846    0.02465    0.00654
N7    5    0.284909   -0.003105    0.384389    11.00000    0.12851    0.03823 =
         0.05856   -0.00445    0.04766    0.02106
AFIX  43
H7    2    0.291900   -0.036902    0.364641    11.00000   -1.20000
AFIX   0
C14   1    0.139259    0.118061    0.190846    11.00000    0.03548    0.05165 =
         0.04815    0.01438    0.02180    0.00664
AFIX  43
H14   2    0.179651    0.114308    0.203555    11.00000   -1.20000
AFIX   0
C24   1    0.322591    0.151366    0.170528    11.00000    0.02913    0.05061 =
         0.08486    0.00609    0.02780    0.00997
AFIX  43
H24   2    0.354877    0.130242    0.167837    11.00000   -1.20000
AFIX   0
C11   1    0.056229    0.178468    0.160035    11.00000    0.02534    0.05317 =
         0.03213    0.00140    0.01449   -0.00319
C21   1    0.270205    0.150223    0.013692    11.00000    0.05454    0.06915 =
         0.06456   -0.00980    0.05414   -0.01210
AFIX  43
H21   2    0.300205    0.127730    0.006345    11.00000   -1.20000
AFIX   0
C7    1    0.032607    0.236987    0.149667    11.00000    0.03471    0.04144 =
         0.03006    0.00778    0.01326    0.00856
C32   1    0.352621    0.289089    0.423986    11.00000    0.04666    0.06284 =
         0.05246    0.00511    0.01896   -0.00812
C13   1    0.105597    0.064728    0.189374    11.00000    0.05061    0.04274 =
         0.06734    0.01194    0.02624   -0.00469
AFIX  43
H13   2    0.123650    0.026672    0.199582    11.00000   -1.20000
AFIX   0
C4    1   -0.008808    0.353159    0.131376    11.00000    0.03420    0.06194 =
         0.05390    0.01306    0.02527    0.02080
AFIX  43
H4    2   -0.021986    0.393282    0.125536    11.00000   -1.20000
AFIX   0
C10   1    0.020444    0.126807    0.157571    11.00000    0.02325    0.06862 =
         0.03445    0.00845    0.01033   -0.00278
C33   1    0.403938    0.273275    0.415405    11.00000    0.07118    0.06471 =
         0.05501   -0.00070    0.01841    0.01027
AFIX  43
H33   2    0.422451    0.237203    0.439546    11.00000   -1.20000
AFIX   0
C22   1    0.274409    0.165728    0.096013    11.00000    0.06162    0.04608 =
         0.07101   -0.00982    0.04990   -0.01077
C23   1    0.227260    0.196922    0.105816    11.00000    0.02730    0.04578 =
         0.04490    0.00043    0.02390   -0.00655
C19   1    0.177083    0.215131    0.036430    11.00000    0.05021    0.04800 =
         0.04196   -0.00014    0.02547   -0.01732
C27   1    0.257863    0.103371    0.444134    11.00000    0.07315    0.03846 =
         0.05046    0.01677    0.03270    0.02038
C6    1   -0.027126    0.245868    0.136045    11.00000    0.03900    0.06810 =
         0.03723    0.00693    0.02012    0.01495
C15   1    0.088139    0.264813   -0.013767    11.00000    0.05417    0.05722 =
         0.04780    0.01613    0.02128    0.00149
AFIX  43
H15   2    0.059377    0.288210   -0.004552    11.00000   -1.20000
AFIX   0
C9    1   -0.040724    0.138141    0.141275    11.00000    0.03620    0.05622 =
         0.05677    0.00715    0.02276    0.00209
AFIX  43
H9    2   -0.065466    0.104995    0.136812    11.00000   -1.20000
AFIX   0
C12   1    0.046833    0.070071    0.172895    11.00000    0.04591    0.05453 =
         0.04959   -0.00125    0.02251   -0.00792
AFIX  43
H12   2    0.024420    0.035601    0.171933    11.00000   -1.20000
AFIX   0
C28   1    0.218516    0.057572    0.421062    11.00000    0.07923    0.05799 =
         0.08539    0.00780    0.02515    0.00571
AFIX  43
H28   2    0.181697    0.061617    0.424987    11.00000   -1.20000
AFIX   0
C31   1    0.312492    0.096375    0.437348    11.00000    0.08556    0.06847 =
         0.05013   -0.00062    0.02635   -0.02266
AFIX  43
H31   2    0.339982    0.127854    0.452355    11.00000   -1.20000
AFIX   0
C20   1    0.222907    0.167975   -0.053845    11.00000    0.06977    0.08339 =
         0.04246   -0.00074    0.04365   -0.01871
AFIX  43
H20   2    0.221992    0.159082   -0.106842    11.00000   -1.20000
AFIX   0
N1S   5    0.730160    0.492536    0.677834    11.00000    0.08186    0.09187 =
         0.13082   -0.01050    0.05962   -0.01935
C8    1   -0.063615    0.193521    0.132289    11.00000    0.02557    0.09422 =
         0.04188    0.01234    0.02606    0.00757
AFIX  43
H8    2   -0.103322    0.198665    0.123535    11.00000   -1.20000
AFIX   0
N8    5    0.403185    0.357415    0.338355    11.00000    0.11406    0.07939 =
         0.12483    0.01999    0.10002    0.01008
AFIX  43
H8A   2    0.419584    0.378153    0.310675    11.00000   -1.20000
AFIX   0
C29   1    0.233614    0.004980    0.391745    11.00000    0.10582    0.05271 =
         0.04823   -0.01579    0.02388    0.01184
AFIX  43
H29   2    0.206321   -0.026670    0.376218    11.00000   -1.20000
AFIX   0
C34   1    0.427871    0.306360    0.375111    11.00000    0.06924    0.10473 =
         0.06784    0.00204    0.04772    0.02771
AFIX  43
H34   2    0.463398    0.293950    0.371864    11.00000   -1.20000
AFIX   0
C3    1    0.050732    0.340747    0.145149    11.00000    0.05634    0.04672 =
         0.04727    0.01545    0.02465    0.01778
AFIX  43
H3    2    0.076252    0.372851    0.147809    11.00000   -1.20000
AFIX   0
C36   1    0.326468    0.342659    0.385254    11.00000    0.10642    0.05940 =
         0.25572    0.01850    0.13104    0.01470
AFIX  43
H36   2    0.290699    0.355324    0.387441    11.00000   -1.20000
AFIX   0
C5    1   -0.046509    0.307976    0.126615    11.00000    0.03590    0.07516 =
         0.04655    0.01412    0.02717    0.02215
AFIX  43
H5    2   -0.085759    0.316898    0.117081    11.00000   -1.20000
AFIX   0
C30   1    0.325739    0.039676    0.406751    11.00000    0.11330    0.05930 =
         0.07498    0.00266    0.05077    0.01392
AFIX  43
H30   2    0.362289    0.033285    0.402803    11.00000   -1.20000
AFIX   0
C18   1    0.174837    0.199819   -0.045238    11.00000    0.06443    0.06182 =
         0.04854   -0.00532    0.04120   -0.02067
C16   1    0.082510    0.252234   -0.095915    11.00000    0.06102    0.11086 =
         0.04612    0.02948    0.01506   -0.00700
AFIX  43
H16   2    0.048980    0.265181   -0.139842    11.00000   -1.20000
AFIX   0
C17   1    0.124726    0.221851   -0.111972    11.00000    0.04853    0.08945 =
         0.03371    0.00126    0.01448   -0.01618
AFIX  43
H17   2    0.121171    0.215236   -0.166701    11.00000   -1.20000
AFIX   0
C35   1    0.353801    0.376918    0.343590    11.00000    0.14243    0.06028 =
         0.20204    0.04709    0.10952    0.02071
AFIX  43
H35   2    0.337408    0.413727    0.319225    11.00000   -1.20000
AFIX   0
YB1   8    0.249938    0.250692    0.490381    10.50000    0.02854    0.02685 =
         0.01984   -0.00204    0.01530    0.00190
PART    1
C1A   1    0.042932    0.444975   -0.080071    10.60000    0.16129    0.16403 =
         0.17079    0.00737    0.05749   -0.00173
S1A   7   -0.025307    0.401675   -0.125916    10.60000    0.12149    0.14179 =
         0.19595    0.05749    0.01437    0.00016
F3A   3    0.032220    0.483903   -0.030035    10.60000    0.47168    0.47168 =
         0.47168    0.00000    0.17563    0.00000
F2A   3    0.049342    0.476716   -0.139353    10.60000    0.23678    0.23697 =
         0.23694    0.00013    0.08824   -0.00006
F1A   3    0.086429    0.412126   -0.041821    10.60000    0.12260    0.13275 =
         0.15799    0.00824    0.03171    0.00122
O3A   6   -0.069225    0.444005   -0.168843    10.60000    0.19873    0.19874 =
         0.19889    0.00015    0.07393   -0.00003
O2A   6   -0.023542    0.362136   -0.187747    10.60000    0.18566    0.20049 =
         0.19321   -0.01259    0.06764    0.01769
O1A   6   -0.040577    0.370134   -0.071972    10.60000    0.12624    0.13772 =
         0.13137    0.03058    0.04269   -0.02532
PART    2
O4A   6    0.596245    0.402516    0.327953    10.90000    0.16386    0.16193 =
         0.15992   -0.04264    0.07757    0.04744
O5A   6    0.507196    0.428483    0.335760    10.90000    0.08201    0.13656 =
         0.13680    0.00040    0.03966   -0.02171
O6A   6    0.581964    0.497858    0.353503    10.90000    0.18066    0.15883 =
         0.19585    0.01478    0.07804   -0.03176
C2A   1    0.597662    0.439732    0.478991    10.90000    0.11067    0.11897 =
         0.11781   -0.01108    0.04940   -0.00332
F4A   3    0.653674    0.441578    0.507568    10.90000    0.17725    0.18540 =
         0.18131    0.00156    0.05764   -0.00479
S2A   7    0.569074    0.443517    0.362748    10.90000    0.13029    0.12695 =
         0.12865    0.02363    0.05790    0.02544
F6A   3    0.572285    0.392715    0.480507    10.90000    0.23897    0.23746 =
         0.23492   -0.01556    0.10307   -0.01055
F5A   3    0.575205    0.484244    0.507936    10.90000    0.17521    0.15475 =
         0.16039    0.00109    0.06947    0.01392
PART    1
C2S   1    0.833625    0.519091    0.684033    11.00000    0.12732    0.07536 =
         0.27082    0.01082    0.10841    0.00390
AFIX  43
H2S   2    0.861061    0.487911    0.704389    11.00000   -1.20000
AFIX   0
C3S   1    0.848400    0.565481    0.669312    11.00000    0.17322    0.08489 =
         0.15555    0.01592    0.10468   -0.01493
AFIX  93
H3S3  2    0.821001    0.596692    0.648953    11.00000   -1.20000
H3S4  2    0.887852    0.572108    0.677663    11.00000   -1.20000
AFIX   0
C1S   1    0.772222    0.508618    0.671099    11.00000    0.07514    0.10348 =
         0.10044   -0.00432    0.03612   -0.00143
HKLF    4


REM  MLKS339_0m_a.res in C2/c
REM wR2 = 0.2958, GooF = S = 1.055, Restrained GooF = 1.148 for all data
REM R1 = 0.0990 for 5031 Fo > 4sig(Fo) and 0.1417 for all 7600 data
REM 613 parameters refined using 138 restraints

END

WGHT      0.1390    273.7507

REM Highest difference peak  3.070,  deepest hole -1.973,  1-sigma level  0.210
Q1    1   0.5000  0.3436  0.2500  10.50000  0.05    3.07
Q2    1   0.5000  0.3957  0.2500  10.50000  0.05    2.17
Q3    1  -0.0252  0.4302 -0.0765  11.00000  0.05    1.89
Q4    1   0.3126  0.3129  0.4775  11.00000  0.05    1.51
Q5    1  -0.0268  0.3430 -0.1247  11.00000  0.05    1.48
Q6    1   0.3044  0.1768  0.4731  11.00000  0.05    1.41
Q7    1   0.5582  0.4237  0.2561  11.00000  0.05    1.39
Q8    1  -0.0104  0.3886 -0.1818  11.00000  0.05    1.21
Q9    1  -0.0589  0.4307 -0.2099  11.00000  0.05    1.08
Q10   1   0.0449  0.4956 -0.0736  11.00000  0.05    1.06
Q11   1   0.0622  0.4370 -0.1367  11.00000  0.05    1.02
Q12   1   0.6043  0.4932  0.4254  11.00000  0.05    0.94
Q13   1   0.2393  0.2709  0.4627  11.00000  0.05    0.93
Q14   1   0.2462  0.2328  0.4613  11.00000  0.05    0.92
Q15   1   0.0000  0.3475 -0.2500  10.50000  0.05    0.92
Q16   1   0.0653  0.4275  0.0077  11.00000  0.05    0.87
Q17   1   0.4835  0.4370  0.4370  11.00000  0.05    0.84
Q18   1   0.0257  0.3837 -0.2142  11.00000  0.05    0.81
Q19   1   0.0366  0.4015 -0.1816  11.00000  0.05    0.79
Q20   1   0.6153  0.4518  0.3305  11.00000  0.05    0.77
Q21   1   0.1840  0.2463  0.2143  11.00000  0.05    0.76
Q22   1   0.0000  0.3992 -0.2500  10.50000  0.05    0.75
Q23   1   0.0834  0.4079 -0.0877  11.00000  0.05    0.73
Q24   1   0.5248  0.4317  0.4433  11.00000  0.05    0.71
Q25   1   0.7175  0.4954  0.5957  11.00000  0.05    0.68
Q26   1   0.0816  0.3849  0.0021  11.00000  0.05    0.67
Q27   1   0.3497  0.0973  0.4377  11.00000  0.05    0.65
Q28   1   0.5115  0.4026  0.4223  11.00000  0.05    0.64
Q29   1   0.0444  0.1611  0.1784  11.00000  0.05    0.62
Q30   1   0.4908  0.3890  0.3204  11.00000  0.05    0.61
Q31   1   0.4730  0.3559  0.4007  11.00000  0.05    0.60
Q32   1   0.3536  0.4058  0.4390  11.00000  0.05    0.58
Q33   1   0.5146  0.3773  0.3993  11.00000  0.05    0.56
Q34   1   0.1240  0.2236  0.1470  11.00000  0.05    0.56
Q35   1   0.4142  0.3961  0.3952  11.00000  0.05    0.55
Q36   1   0.5355  0.3875  0.3828  11.00000  0.05    0.50
Q37   1   0.5365  0.4949  0.4311  11.00000  0.05    0.47
Q38   1   0.3761  0.3786  0.4623  11.00000  0.05    0.47
Q39   1   0.3421  0.3714  0.3069  11.00000  0.05    0.46
Q40   1   0.1539  0.4324  0.0084  11.00000  0.05    0.46
Q41   1   0.5407  0.5488  0.5208  11.00000  0.05    0.46
Q42   1   0.3125  0.0099  0.4171  11.00000  0.05    0.45
Q43   1   0.2219  0.1911  0.1590  11.00000  0.05    0.45
Q44   1   0.2066  0.1712  0.1627  11.00000  0.05    0.45
Q45   1   0.2029  0.4099  0.1336  11.00000  0.05    0.44
Q46   1   0.1932 -0.0526  0.3629  11.00000  0.05    0.44
Q47   1   0.3112 -0.0791  0.4011  11.00000  0.05    0.44
Q48   1   0.0288  0.4787 -0.1735  11.00000  0.05    0.44
Q49   1   0.2683  0.1877  0.5011  11.00000  0.05    0.43
Q50   1   0.4965  0.3955  0.4741  11.00000  0.05    0.43
Q51   1  -0.0327  0.2905  0.1557  11.00000  0.05    0.43
Q52   1   0.2146  0.4242  0.2045  11.00000  0.05    0.42
Q53   1   0.3525  0.3278  0.4472  11.00000  0.05    0.42
Q54   1   0.5000  0.4577  0.2500  10.50000  0.05    0.42
Q55   1   0.0000  0.2479  0.2500  10.50000  0.05    0.42
Q56   1   0.8819  0.5346  0.6982  11.00000  0.05    0.42
Q57   1   0.3336 -0.0698  0.3741  11.00000  0.05    0.41
Q58   1   0.1950  0.2505  0.3178  11.00000  0.05    0.41
Q59   1   0.0878  0.1733  0.1834  11.00000  0.05    0.41
Q60   1   0.1836  0.4107  0.1598  11.00000  0.05    0.41
;

# END of CIF
