# Supplementary material
Source: MDPI journal article supplement (https://www.mdpi.com/2312-7481/7/6/79)
Supplement: s1 [file s1 › 1_MalCN.cif]

#\#CIF_1.1

#  CIF produced by WinGX routine CIF_UPDATE
#  Created on 2021-03-12 at 15:01:46
#  Using CIFtbx version 3.0.4  1 Sep 2006

#  Dictionary name : cif_core.dic
#  Dictionary vers : 2.4.5
#  Request file    : c:\wingx\files\archive.reqdat
#  CIF files read  : mlks342_11_0m_b project

#------------------ SECTION 1. GLOBAL INFORMATION ---------------------------#

data_global

#------------------ AUDIT DETAILS -------------------------------------------#

_audit_creation_date            2021-03-12
_audit_creation_method          'WinGX routine CIF_UPDATE'
_audit_conform_dict_name        cif_core.dic
_audit_conform_dict_version     2.4.3
_audit_conform_dict_location    ftp://ftp.iucr.org/pub/cif_core.dic
_audit_update_record            ?

#------------------ AUTHOR DETAILS -------------------------------------------#

# Name and address of author for correspondence

_publ_contact_author_name       'Liberka, Michal'
_publ_contact_author_address
;
Gronostajowa 2, 30-387 Krakow, Poland
;
_publ_contact_author_email       'michal.liberka@doctoral.uj.edu.pl'
_publ_contact_author_fax         ' '
_publ_contact_author_phone       ' '


# Insert blank lines between references

_publ_section_references
;
Blessing, R. H. (1995) Acta Cryst., A51, 33-38.

Blessing, R. H. (1987) Cryst. Rev. 1, 3-58.

Blessing, R. H. (1989) J. Appl. Cryst. 22, 396-397.

Bruker (2012) APEX2 (Version 2012.10-0), SAINT (version 8.27B), SADABS
(version 2012/1), BrukerAXS Inc, Madison, Wisconsin, USA.

ABSCOR: Higashi, T. (1995). ABSCOR. Rigaku Corporation, Tokyo, Japan.

CAD-4 Software: Enraf-Nonius (1989). CAD-4 Software (or CAD-4 EXPRESS).
Enraf-Nonius, Delft, The Netherlands.

Cambridge Structural Database: Allen, F. R. (2002). Acta Cryst. B58, 380-388.

CAMERON: Watkin, D. J., Prout, C. K. & Pearce, L. J. (1996). CAMERON.
Chemical Crystallography Laboratory, Oxford, England.

CrysAlis CCD, CrysAlis RED and associated programs: Oxford Diffraction (2006).
Program name(s). Oxford Diffraction Ltd, Abingdon, England.

CRYSTALS: Betteridge, P. W., Carruthers, J. R., Cooper, R. I., Prout, K. &
Watkin, D. J. (2003). J. Appl. Cryst. 36, 1487.

COLLECT: Nonius (1998). COLLECT. Nonius BV, Delft, The Netherlands.

DENZO/SCALEPACK:  Otwinowski, Z. & Minor, W. (1997). Methods in Enzymology,
Vol. 276, Macromolecular Crystallography, Part A, edited by C. W. Carter Jr
& R. M. Sweet, pp. 307-326. New York: Academic Press.

DIAMOND: Brandenburg, K.(2006). DIAMOND. Crystal Impact GbR, Bonn, Germany.

DIF4 and REDU4: Stoe & Cie (1991). Program name(s). Stoe & Cie, Darmstadt,
Germany.

DIFABS: Walker, N. &  Stuart, D. (1983). Acta Cryst., A39, 158 - 166.

DIRAX: Duisenberg, A. J. M. (1992). J. Appl. Cryst. 25, 92-96.

DIRDIF-2008: Beurskens, P.T., Beurskens, G., de Gelder, R., Garci\'ia-Granda,
S., Gould, R.O. & Smits, J.M.M. (2008) The DIRDIF-2008 program
system, Crystallography Laboratory, Radboud University  Nijmegen,
The Netherlands.

EDMA: Palatinus, L., Prathapa, S. J. & van Smaalen, S. (2012) J. Appl. Cryst.
45, 575-580.

enCIFer: Allen, F. H., Johnson, O., Shields, G. P., Smith, B. R. & Towler,
M. (2004). J. Appl. Cryst. 37, 335-338.

EVALCCD: Duisenberg, A. J. M., Kroon-Batenburg, L. M. J. & Schreurs,
A. M. M. (2003). J. Appl. Cryst. 36, 220-229.

JANA2000: Petricek, V. & Dusek, M. (2000). JANA2000. Institute of Physics,
Czech Academy of Sciences, Prague, Czech Republic.

MERCURY: Macrae, C. F., Bruno, I. J., Chisholm, J. A., Edgington,
P. R., McCabe, P., Pidcock, E., Rodriguez-Monge, L., Taylor, R.,
van de Streek, J. & Wood, P. A. (2008). J. Appl. Cryst. 41, 466-470.

MOGUL: Bruno, I. J., Cole, J. C., Kessler, M., Luo, J., Motherwell,
W. D. S., Purkis, L. H., Smith, B. R., Taylor, R., Cooper, R. I., Harris,
S. E. & Orpen, A. G. (2004). J. Chem. Inf. Comput. Sci. 44, 2133-2144.

ORTEPII: Johnson, C. K. (1976). ORTEPII. Report ORNL-5138. Oak Ridge
National Laboratory, Tennessee, USA.

ORTEPIII:  Burnett, M. N. & Johnson, C. K. (1996). ORTEPIII.
Report ORNL-6895. Oak Ridge National Laboratory, Tennessee, USA.

ORTEP-3: Farrugia, L. J. (2012). J. Appl. Cryst. 45, 849-854.

PARST: Nardelli, M. (1995). J. Appl. Cryst. 28, 659.

PLATON: Spek, A. L. (2009). Acta. Cryst. D65, 148-155.

PROCESS: Rigaku (1996). PROCESS. Rigaku Corporation, Tokyo, Japan.

PROCESS-AUTO: Rigaku (1998). PROCESS-AUTO. Rigaku Corporation, Tokyo, Japan.

PublCIF: Westrip, S. P. (2010). J. Appl. Cryst. 43, 920-925.

SCHAKAL: Keller, E. (1999) University of Freiburg, Germany.

SHELX: Sheldrick, G. M. (2008). Acta Cryst. A64, 112-122.

SHELXD: Schneider, T. R. & Sheldrick, G. M. (2002) Acta Cryst. D58, 1772-1779.

SIR92: Altomare, A., Cascarano, G., Giacovazzo, C., Guagliardi, A., Burla,
M. C., Polidori, G. & Camalli, M. (1994). J. Appl. Cryst. 27, 435.

SIR97: Altomare, A., Burla, M. C., Camalli, M., Cascarano, G. L.,
Giacovazzo, C., Guagliardi, A., Moliterni, A. G. G., Polidori, G. &
Spagna, R. (1999). J. Appl. Cryst. 32, 115-119.

SIR2002: Burla, M. C., Camalli, M., Carrozzini, B., Cascarano, G. L.,
Giacovazzo, C., Polidori, G. & Spagna, R. (2003). J. Appl. Cryst. 36, 1103.

SIR2004: Burla, M. C., Caliandro, R., Camalli, M., Carrozzini, B.,
Cascarano, G. L., De Caro, L., Giacovazzo, C., Polidori, G. & Spagna, R.
(2005). J. Appl. Cryst. 38, 381-388.

SIR2008 & IL MILIONE: Burla, M. C., Caliandro, R., Camalli, M., Carrozzini, B.,
Cascarano, G. L., De Caro, L., Giacovazzo, C., Polidori, G., Siliqi, D.,
& Spagna, R. (2007). J. Appl. Cryst. 40, 609-613.

SIR2011: Burla, M. C., Caliandro, R., Camalli, M., Carrozzini, B.,
Cascarano, G. L., Giacovazzo, C., Mallamo, M., Mazzone, A., Polidori, G.
& Spagna, R. (2012). J. Appl. Cryst. 45, 357-361.

SUPERFLIP: Palatinus, L. & Chapuis, G. (2007) J. Appl. Cryst. 40, 786-790.

TEXSAN: Molecular Structure Corporation & Rigaku (2000). TEXSAN. MSC,
The Woodlands, Texas, USA, and Rigaku Corporation, Tokyo, Japan.

WinGX: Farrugia, L. J. (2012). J. Appl. Cryst. 45, 849-854.

X-AREA, X-RED, X-RED32, X-SHAPE:  Stoe & Cie (2002). Program name(s).
Stoe & Cie GmbH, Darmstadt, Germany.

XCAD4: Harms, K. & Wocadlo, S. (1995). XCAD4. University of Marburg, Germany.

XSCANS: Siemens (1994). XSCANS. Siemens Analytical X-ray Instruments Inc.,
Madison, Wisconsin, USA.

;

#------------------  SECTION 2. COMPOUND(S) DETAILS -------------------------#

data_shelx

_audit_creation_date                    2021-03-12T15:01:46-00:00
_audit_creation_method                  'WinGX routine CIF_UPDATE'
_audit_conform_dict_name                cif_core.dic
_audit_conform_dict_version             2.4.5
_audit_conform_dict_location            ftp://ftp.iucr.org/pub/cif_core.dic
_publ_requested_category                FM

#----------------------------------------------------------------------------#
#                   CHEMICAL INFORMATION                                     #
#----------------------------------------------------------------------------#

_chemical_formula_moiety                '2(C72 H52 Fe2 N16 O4 Yb), C2 F6 O6 S2, 4(C F3 O3 S), 4(C3 H2 N2)'
_chemical_formula_sum                   'C164 H120 F18 Fe4 N40 O28 S6 Yb2'
_chemical_formula_weight                4202.83

#----------------------------------------------------------------------------#
#                   UNIT CELL INFORMATION                                    #
#----------------------------------------------------------------------------#

_symmetry_cell_setting                  monoclinic
_symmetry_space_group_name_H-M          'C 2/c'
_symmetry_space_group_name_Hall         '-C 2yc'
_symmetry_Int_Tables_number             15
loop_
    _symmetry_equiv_pos_as_xyz
'x, y, z'
'-x, y, -z+1/2'
'x+1/2, y+1/2, z'
'-x+1/2, y+1/2, -z+1/2'
'-x, -y, -z'
'x, -y, z-1/2'
'-x+1/2, -y+1/2, -z'
'x+1/2, -y+1/2, z-1/2'

_cell_length_a                          23.7146(9)
_cell_length_b                          21.4669(9)
_cell_length_c                          18.1322(7)
_cell_angle_alpha                       90
_cell_angle_beta                        108.7190(10)
_cell_angle_gamma                       90
_cell_volume                            8742.5(6)
_cell_formula_units_Z                   2
_cell_measurement_temperature           100(2)
_cell_measurement_reflns_used           46012
_cell_measurement_theta_min             2.238
_cell_measurement_theta_max             25.027
_cell_measurement_wavelength            0.71073

#----------------------------------------------------------------------------#
#                   CRYSTAL INFORMATION                                      #
#----------------------------------------------------------------------------#

_exptl_crystal_description              plate	
_exptl_crystal_colour                   red
_exptl_crystal_size_max                 0.42
_exptl_crystal_size_mid                 0.12
_exptl_crystal_size_min                 0.11
_exptl_crystal_density_diffrn           1.597
_exptl_crystal_density_method           'not measured'
_exptl_crystal_F_000                    4220

#----------------------------------------------------------------------------#
#                   ABSORPTION CORRECTION                                    #
#----------------------------------------------------------------------------#

_exptl_absorpt_coefficient_mu           1.554
_exptl_absorpt_correction_type          'multi-scan'
_exptl_absorpt_correction_T_min         0.5951
_exptl_absorpt_correction_T_max         0.7454
_exptl_absorpt_process_details          'TWINABS (Sheldrick, 2009)' 

#----------------------------------------------------------------------------#
#                   DATA COLLECTION                                          #
#----------------------------------------------------------------------------#

_diffrn_ambient_temperature             100(2)
_diffrn_radiation_wavelength            0.71073
_diffrn_radiation_type                  MoK\a
_diffrn_radiation_probe                 x-ray
_diffrn_radiation_monochromator         graphite
_diffrn_measurement_device_type   	'D8Quest Eco Photon50' 
_diffrn_measurement_method       	 \w 
_diffrn_standards_number                0
_diffrn_standards_interval_time         0
_diffrn_standards_interval_count        0
_diffrn_standards_decay_%               0
_diffrn_reflns_av_R_equivalents         0.0866
_diffrn_reflns_av_unetI/netI            0.0641
_diffrn_reflns_number                   46012
_diffrn_reflns_limit_h_min              -28
_diffrn_reflns_limit_h_max              28
_diffrn_reflns_limit_k_min              -25
_diffrn_reflns_limit_k_max              25
_diffrn_reflns_limit_l_min              -21
_diffrn_reflns_limit_l_max              21
_diffrn_reflns_theta_min                2.238
_diffrn_reflns_theta_max                25.027
_diffrn_reflns_theta_full               25.027
_diffrn_measured_fraction_theta_full
                                        0.999
_diffrn_measured_fraction_theta_max
                                        0.999
_diffrn_reflns_Laue_measured_fraction_full
                                        0.999
_diffrn_reflns_Laue_measured_fraction_max
                                        0.999
_diffrn_reflns_point_group_measured_fraction_full
                                        0.999
_diffrn_reflns_point_group_measured_fraction_max
                                        0.999
_reflns_Friedel_coverage                0
_reflns_number_total                    7708
_reflns_number_gt                       5499
_reflns_threshold_expression            'I > 2\s(I)'

#----------------------------------------------------------------------------#
#                   COMPUTER PROGRAMS USED                                   #
#----------------------------------------------------------------------------#

_computing_structure_refinement         'SHELXL-2018/3 (Sheldrick, 2018)'
_computing_molecular_graphics           'Ortep for Windows (Farrugia, 2012)'
_computing_publication_material
                                   'WinGX publication routines (Farrugia, 2012)'

#----------------------------------------------------------------------------#
#                   STRUCTURE SOLUTION                                       #
#----------------------------------------------------------------------------#

_atom_sites_solution_hydrogens          geom

#----------------------------------------------------------------------------#
#                   REFINEMENT INFORMATION                                   #
#----------------------------------------------------------------------------#

_shelx_SHELXL_version_number            2018/3
_refine_ls_structure_factor_coef        Fsqd
_refine_ls_matrix_type                  full
_refine_ls_weighting_scheme             calc
_refine_ls_weighting_details
            'w=1/[\s^2^(Fo^2^)+(0.0923P)^2^+458.4316P] where P=(Fo^2^+2Fc^2^)/3'
_refine_ls_hydrogen_treatment           constr
_refine_ls_extinction_method            none
_refine_ls_number_reflns                7708
_refine_ls_number_parameters            657
_refine_ls_number_restraints            235
_refine_ls_number_constraints           0
_refine_ls_R_factor_all                 0.1349
_refine_ls_R_factor_gt                  0.0979
_refine_ls_wR_factor_ref                0.2559
_refine_ls_wR_factor_gt                 0.2342
_refine_ls_goodness_of_fit_ref          1.098
_refine_ls_restrained_S_all             1.115
_refine_ls_shift/su_max                 0
_refine_ls_shift/su_mean                0
_refine_diff_density_max                2.056
_refine_diff_density_min                -1.968
_refine_diff_density_rms                0.225

# start Validation Reply Form 
_vrf_PLAT342_shelx           
;
RESPONSE: Low C-C bond precision can be caused by moderate structural
disorder involving trimethanesulfonate anions, which have been modeled
from residual electron densities in the crystal strucutre.
Alternatively, low C-C bond precision could be a result of the twinning
affecting in different degree spacially separated parts of the structure.  
;
# end Validation Reply Form

# start Validation Reply Form 
_vrf_PLAT420_shelx           
;
RESPONSE: The methanol molecule in the crystal structure is the acceptor
of the hydrogen bond of H8A-N8 pair. Alternatively, there are also weak
interactions between H4s1 and O6A atoms of trimethanesulfonate anions.
;
# end Validation Reply Form

#----------------------------------------------------------------------------#
#                   CONSTRAINTS AND RESTRAINTS                               #
#----------------------------------------------------------------------------#


#----------------------------------------------------------------------------#
#                   ATOMIC TYPES, COORDINATES AND THERMAL PARAMETERS         #
#----------------------------------------------------------------------------#

loop_
    _atom_type_symbol
    _atom_type_description
    _atom_type_scat_dispersion_real
    _atom_type_scat_dispersion_imag
    _atom_type_scat_source
C C 0.0033 0.0016 'International Tables Vol C Tables 4.2.6.8 and 6.1.1.4'
H H 0 0 'International Tables Vol C Tables 4.2.6.8 and 6.1.1.4'
F F 0.0171 0.0103 'International Tables Vol C Tables 4.2.6.8 and 6.1.1.4'
Fe Fe 0.3463 0.8444 'International Tables Vol C Tables 4.2.6.8 and 6.1.1.4'
N N 0.0061 0.0033 'International Tables Vol C Tables 4.2.6.8 and 6.1.1.4'
O O 0.0106 0.006 'International Tables Vol C Tables 4.2.6.8 and 6.1.1.4'
S S 0.1246 0.1234 'International Tables Vol C Tables 4.2.6.8 and 6.1.1.4'
Yb Yb -0.385 5.5486 'International Tables Vol C Tables 4.2.6.8 and 6.1.1.4'

loop_
    _atom_site_label
    _atom_site_type_symbol
    _atom_site_fract_x
    _atom_site_fract_y
    _atom_site_fract_z
    _atom_site_U_iso_or_equiv
    _atom_site_adp_type
    _atom_site_occupancy
    _atom_site_site_symmetry_order
    _atom_site_calc_flag
    _atom_site_refinement_flags_posn
    _atom_site_refinement_flags_adp
    _atom_site_refinement_flags_occupancy
    _atom_site_disorder_assembly
    _atom_site_disorder_group
Yb1 Yb 0.25 0.25 0 0.0148(2) Uani 1 2 d S . P . .
Fe1 Fe 0.33478(8) 0.24938(12) 0.31004(10) 0.0352(5) Uani 1 1 d . . . . .
O1 O 0.2047(3) 0.1677(4) 0.0231(5) 0.0202(17) Uani 1 1 d . . . . .
N1 N 0.3011(4) 0.2573(5) 0.1336(6) 0.027(2) Uani 1 1 d . . . . .
N2 N 0.2830(6) 0.3796(6) 0.3131(7) 0.041(3) Uani 1 1 d . . . . .
C1 C 0.3147(5) 0.2550(7) 0.2017(7) 0.026(3) Uani 1 1 d . . . . .
C32 C 0.1462(7) 0.3099(8) 0.0607(10) 0.055(4) Uani 1 1 d . U . . .
C7 C 0.4577(6) 0.2346(7) 0.3355(7) 0.038(4) Uani 1 1 d . U . . .
C22 C 0.2115(6) 0.1542(7) 0.3866(8) 0.037(3) Uani 1 1 d . . . . .
C31 C 0.2630(7) 0.0830(8) 0.0915(10) 0.055(5) Uani 1 1 d . . . . .
H31 H 0.298251 0.102216 0.091766 0.066 Uiso 1 1 calc R U . . .
C30 C 0.2658(8) 0.0278(8) 0.1242(11) 0.065(6) Uani 1 1 d . . . . .
H30 H 0.302804 0.009852 0.148848 0.078 Uiso 1 1 calc R U . . .
N5 N 0.3498(5) 0.2407(6) 0.4243(6) 0.039(3) Uani 1 1 d . . . . .
C28 C 0.1582(6) 0.0796(6) 0.0550(11) 0.047(4) Uani 1 1 d . . . . .
H28 H 0.120644 0.096222 0.030577 0.057 Uiso 1 1 calc R U . . .
C11 C 0.4378(7) 0.1783(8) 0.3296(8) 0.043(4) Uani 1 1 d . U . . .
N4 N 0.3776(5) 0.1686(6) 0.3132(6) 0.035(3) Uani 1 1 d . . . . .
C5 C 0.5325(10) 0.3084(12) 0.3552(12) 0.075(6) Uani 1 1 d . U . . .
H5 H 0.572228 0.318582 0.363916 0.09 Uiso 1 1 calc R U . . .
C13 C 0.3923(8) 0.0574(10) 0.3106(10) 0.064(6) Uani 1 1 d . . . . .
H13 H 0.375312 0.017854 0.302739 0.077 Uiso 1 1 calc R U . . .
C2 C 0.3013(6) 0.3300(7) 0.3113(7) 0.032(3) Uani 1 1 d . U . . .
C4 C 0.4979(8) 0.3531(10) 0.3475(10) 0.058(5) Uani 1 1 d . U . . .
H4 H 0.512499 0.393635 0.35193 0.07 Uiso 1 1 calc R U . . .
C16 C 0.3990(7) 0.2539(9) 0.5600(8) 0.055(5) Uani 1 1 d . . . . .
H16 H 0.430674 0.270583 0.599662 0.066 Uiso 1 1 calc R U . . .
C10 C 0.4758(7) 0.1220(9) 0.3367(9) 0.051(4) Uani 1 1 d . U . . .
C27 C 0.2084(6) 0.1141(6) 0.0559(7) 0.024(3) Uani 1 1 d . . . . .
C23 C 0.2588(5) 0.1885(6) 0.3772(7) 0.028(3) Uani 1 1 d . . . . .
C8 C 0.5560(8) 0.1928(10) 0.3609(10) 0.059(5) Uani 1 1 d . U . . .
H8 H 0.596746 0.198671 0.372668 0.071 Uiso 1 1 calc R U . . .
C6 C 0.5205(9) 0.2488(12) 0.3528(10) 0.069(5) Uani 1 1 d . U . . .
C25 C 0.1668(6) 0.1546(7) 0.2484(10) 0.046(4) Uani 1 1 d . . . . .
H25 H 0.136155 0.143259 0.203684 0.055 Uiso 1 1 calc R U . . .
C15 C 0.3945(7) 0.2646(7) 0.4830(8) 0.041(4) Uani 1 1 d . . . . .
H15 H 0.42316 0.288912 0.471846 0.049 Uiso 1 1 calc R U . . .
C24 C 0.1660(7) 0.1362(8) 0.3214(10) 0.051(4) Uani 1 1 d . . . . .
H24 H 0.134852 0.111888 0.326285 0.061 Uiso 1 1 calc R U . . .
C21 C 0.2150(7) 0.1376(8) 0.4671(9) 0.046(4) Uani 1 1 d . . . . .
H21 H 0.185651 0.112686 0.475609 0.055 Uiso 1 1 calc R U . . .
N7 N 0.2162(6) -0.0029(5) 0.1226(6) 0.040(3) Uani 1 1 d . . . . .
H7 H 0.218759 -0.039198 0.143471 0.048 Uiso 1 1 calc R U . . .
C3 C 0.4338(8) 0.3423(10) 0.3313(9) 0.060(5) Uani 1 1 d . . . . .
H3 H 0.406905 0.374985 0.325031 0.072 Uiso 1 1 calc R U . . .
C26 C 0.2141(6) 0.1901(6) 0.2435(8) 0.031(3) Uani 1 1 d . . . . .
H26 H 0.213758 0.203362 0.194513 0.037 Uiso 1 1 calc R U . . .
C29 C 0.1627(8) 0.0229(7) 0.0884(11) 0.055(5) Uani 1 1 d . . . . .
H29 H 0.128375 0.00159 0.087682 0.066 Uiso 1 1 calc R U . . .
C18 C 0.3083(6) 0.1935(8) 0.5172(8) 0.039(4) Uani 1 1 d . . . . .
N3 N 0.4162(5) 0.2821(7) 0.3262(6) 0.043(3) Uani 1 1 d . . . . .
C17 C 0.3563(7) 0.2182(8) 0.5782(8) 0.045(4) Uani 1 1 d . . . . .
H17 H 0.359316 0.210806 0.629814 0.054 Uiso 1 1 calc R U . . .
C19 C 0.3071(6) 0.2081(7) 0.4416(7) 0.029(3) Uani 1 1 d . . . . .
C20 C 0.2590(7) 0.1576(7) 0.5263(8) 0.041(4) Uani 1 1 d . . . . .
H20 H 0.258716 0.148548 0.576295 0.05 Uiso 1 1 calc R U . . .
N6 N 0.2603(4) 0.2063(5) 0.3049(5) 0.023(2) Uani 1 1 d . . . . .
C12 C 0.4538(9) 0.0657(10) 0.3281(11) 0.065(5) Uani 1 1 d . U . . .
H12 H 0.478788 0.031447 0.333413 0.078 Uiso 1 1 calc R U . . .
C14 C 0.3570(7) 0.1115(8) 0.3056(8) 0.044(4) Uani 1 1 d . . . . .
H14 H 0.316404 0.106075 0.296167 0.053 Uiso 1 1 calc R U . . .
C9 C 0.5386(9) 0.1372(11) 0.3539(11) 0.068(5) Uani 1 1 d . U . . .
H9 H 0.566175 0.105226 0.359763 0.082 Uiso 1 1 calc R U . . .
S1A S 0.4879(4) 0.4182(4) 0.5391(6) 0.051(2) Uani 0.5 1 d . . P A 1
C1A C 0.4932(11) 0.4406(12) 0.6272(16) 0.030(6) Uani 0.5 1 d . U P A 1
F3A F 0.4598(11) 0.4812(13) 0.6407(16) 0.092(8) Uani 0.5 1 d . U P A 1
O1A O 0.5194(7) 0.3640(8) 0.5437(11) 0.031(4) Uani 0.5 1 d . . P A 1
F1A F 0.5466(7) 0.4639(9) 0.6731(10) 0.051(5) Uani 0.5 1 d . . P A 1
O2A O 0.5086(15) 0.4740(13) 0.505(2) 0.093(10) Uani 0.5 1 d . U P A 1
O3A O 0.4235(10) 0.4103(13) 0.4998(14) 0.071(8) Uani 0.5 1 d . . P A 1
F2A F 0.4799(12) 0.3947(14) 0.6683(16) 0.098(8) Uani 0.5 1 d . U P A 1
F5A F 0.0550(8) 0.5252(9) -0.0076(9) 0.169(8) Uani 1 1 d D U . B 2
O6A O 0.0223(6) 0.5673(9) -0.1644(8) 0.135(7) Uani 1 1 d D U . B 2
O4A O 0.0926(10) 0.4896(7) -0.1380(15) 0.166(9) Uani 1 1 d D U . B 2
O5A O 0.1178(8) 0.5863(9) -0.1616(12) 0.136(7) Uani 1 1 d D U . B 2
F4A F 0.1450(7) 0.5519(10) 0.0158(9) 0.176(8) Uani 1 1 d D U . B 2
F6A F 0.0733(9) 0.6191(8) -0.0165(10) 0.201(10) Uani 1 1 d D U . B 2
S2A S 0.0818(3) 0.5518(4) -0.1323(4) 0.104(2) Uani 1 1 d D U . B 2
C2A C 0.0897(10) 0.5617(10) -0.0335(10) 0.155(14) Uani 1 1 d D U . B 2
O2 O 0.1814(3) 0.3095(4) 0.0213(5) 0.0254(19) Uani 1 1 d . U . . .
N8 N 0.0926(11) 0.2961(13) 0.1807(13) 0.046(7) Uani 0.5 1 d . . P C 1
H8A H 0.075045 0.290763 0.215022 0.055 Uiso 0.5 1 calc R U P C 1
C34 C 0.1397(15) 0.3336(14) 0.1943(17) 0.053(9) Uani 0.5 1 d . . P C 1
H34 H 0.15471 0.354178 0.2417 0.063 Uiso 0.5 1 calc R U P C 1
C33 C 0.1651(11) 0.3413(11) 0.1391(15) 0.031(6) Uani 0.5 1 d . . P C 1
H33 H 0.197359 0.368389 0.149963 0.037 Uiso 0.5 1 calc R U P C 1
N8B N 0.0551(11) 0.3357(12) 0.1227(14) 0.042(6) Uani 0.5 1 d . U P C 2
H8B H 0.029203 0.341702 0.146084 0.05 Uiso 0.5 1 calc R U P C 2
C33B C 0.1228(12) 0.3795(15) 0.0669(13) 0.042(7) Uani 0.5 1 d . U P C 2
H33B H 0.140774 0.413108 0.050987 0.051 Uiso 0.5 1 calc R U P C 2
C34B C 0.0783(13) 0.3892(16) 0.0945(16) 0.051(8) Uani 0.5 1 d . U P C 2
H34B H 0.062786 0.428821 0.095702 0.062 Uiso 0.5 1 calc R U P C 2
N1S N 0.378(2) 0.464(3) 0.117(3) 0.32(3) Uani 1 1 d D U . . .
C1S C 0.3408(17) 0.441(2) 0.141(2) 0.172(16) Uani 1 1 d D U . . .
C3S C 0.2570(12) 0.4740(12) 0.1589(16) 0.099(8) Uani 1 1 d D U . . .
C2S C 0.2852(16) 0.4203(14) 0.141(2) 0.151(13) Uani 1 1 d D U . . .
H2S1 H 0.289202 0.388307 0.180672 0.181 Uiso 1 1 calc R U . . .
H2S2 H 0.262556 0.403472 0.091018 0.181 Uiso 1 1 calc R U . . .
N2S N 0.2285(13) 0.5120(13) 0.1770(18) 0.160(11) Uani 1 1 d D U . . .
C35 C 0.0739(7) 0.2679(10) 0.1133(12) 0.068(6) Uani 0.5 1 d . . P C 1
H35 H 0.036505 0.249443 0.096203 0.082 Uiso 0.5 1 calc R U P C 1
C36 C 0.1100(6) 0.2661(7) 0.0690(8) 0.038(4) Uani 0.5 1 d . . P C 1
H36 H 0.109083 0.229552 0.041035 0.046 Uiso 0.5 1 calc R U P C 1
C35B C 0.0739(7) 0.2679(10) 0.1133(12) 0.068(6) Uani 0.5 1 d . . P C 2
H35B H 0.062047 0.233204 0.135205 0.082 Uiso 0.5 1 calc R U P C 2
C36B C 0.1100(6) 0.2661(7) 0.0690(8) 0.038(4) Uani 0.5 1 d . . P C 2
H36B H 0.109083 0.229552 0.041035 0.046 Uiso 0.5 1 calc R U P C 2
O1S O 0 0.2644(4) 0.25 0.0074(15) Uani 1 2 d DS TU P . .
H4S1 H 0.01019 0.277153 0.295003 0.011 Uiso 0.5 1 calc R U P . .
C4S C 0 0.1999(6) 0.25 0.023(3) Uani 1 2 d DS TU P . .
H4S2 H 0.040001 0.184993 0.260742 0.035 Uiso 0.5 1 calc R U P . .
H4S3 H -0.024229 0.184993 0.199944 0.035 Uiso 0.5 1 calc R U P . .
H4S4 H -0.015772 0.184993 0.289314 0.035 Uiso 0.5 1 calc R U P . .

loop_
    _atom_site_aniso_label
    _atom_site_aniso_U_11
    _atom_site_aniso_U_22
    _atom_site_aniso_U_33
    _atom_site_aniso_U_23
    _atom_site_aniso_U_13
    _atom_site_aniso_U_12
Yb1 0.0118(3) 0.0197(3) 0.0134(3) -0.0046(3) 0.0050(2) -0.0024(3)
Fe1 0.0259(9) 0.0624(13) 0.0184(8) -0.0151(11) 0.0087(7) -0.0117(11)
O1 0.014(4) 0.023(4) 0.024(4) 0.000(4) 0.007(3) -0.001(3)
N1 0.023(5) 0.023(6) 0.033(6) -0.007(5) 0.007(4) 0.001(5)
N2 0.060(8) 0.041(7) 0.030(7) -0.018(6) 0.025(6) -0.019(6)
C1 0.024(6) 0.036(7) 0.019(6) 0.000(6) 0.008(5) -0.003(6)
C32 0.050(7) 0.063(8) 0.063(8) -0.032(7) 0.033(6) -0.015(6)
C7 0.027(6) 0.067(8) 0.019(5) 0.006(5) 0.006(5) 0.012(6)
C22 0.031(7) 0.052(9) 0.027(7) 0.006(7) 0.007(6) 0.007(7)
C31 0.026(8) 0.065(11) 0.067(12) 0.031(9) 0.004(8) 0.000(8)
C30 0.045(10) 0.053(11) 0.077(13) 0.046(10) -0.007(9) 0.004(9)
N5 0.034(6) 0.064(9) 0.021(5) -0.012(6) 0.012(5) -0.010(6)
C28 0.026(7) 0.019(7) 0.098(13) 0.012(8) 0.023(8) 0.002(6)
C11 0.039(7) 0.068(8) 0.019(6) 0.013(6) 0.009(5) 0.005(6)
N4 0.021(6) 0.074(9) 0.007(5) 0.010(5) 0.001(4) 0.009(6)
C5 0.066(9) 0.106(10) 0.060(9) -0.002(8) 0.029(7) -0.002(8)
C13 0.060(11) 0.092(14) 0.047(10) 0.039(10) 0.027(9) 0.045(11)
C2 0.034(6) 0.046(7) 0.020(6) -0.013(5) 0.014(5) -0.010(6)
C4 0.052(8) 0.080(9) 0.044(8) -0.006(7) 0.017(6) -0.015(7)
C16 0.047(9) 0.086(13) 0.030(8) -0.033(9) 0.008(7) -0.005(10)
C10 0.036(7) 0.083(9) 0.037(7) 0.014(7) 0.015(6) 0.012(7)
C27 0.032(7) 0.022(6) 0.020(6) -0.011(5) 0.010(5) 0.000(5)
C23 0.022(6) 0.042(8) 0.018(6) -0.003(6) 0.005(5) 0.002(6)
C8 0.041(7) 0.098(10) 0.042(7) 0.004(7) 0.016(6) 0.012(7)
C6 0.066(8) 0.102(10) 0.045(7) 0.005(8) 0.026(6) -0.006(8)
C25 0.025(7) 0.054(10) 0.052(10) 0.003(8) 0.004(7) -0.016(7)
C15 0.037(8) 0.061(11) 0.025(7) -0.018(7) 0.010(6) -0.009(7)
C24 0.043(9) 0.061(11) 0.054(10) 0.003(8) 0.025(8) -0.018(8)
C21 0.035(9) 0.061(11) 0.047(10) 0.011(8) 0.019(8) -0.006(8)
N7 0.066(9) 0.033(7) 0.024(6) 0.013(5) 0.020(6) 0.004(6)
C3 0.053(10) 0.104(15) 0.035(9) -0.027(9) 0.031(8) -0.037(11)
C26 0.032(7) 0.039(8) 0.025(7) 0.007(6) 0.013(6) -0.007(6)
C29 0.055(11) 0.033(9) 0.093(14) -0.002(9) 0.045(10) -0.006(8)
C18 0.037(8) 0.064(10) 0.020(7) -0.013(7) 0.015(6) 0.007(7)
N3 0.029(6) 0.088(10) 0.012(5) -0.012(6) 0.007(5) -0.033(7)
C17 0.044(9) 0.079(11) 0.016(7) -0.006(7) 0.016(6) 0.009(8)
C19 0.028(7) 0.044(8) 0.020(6) -0.003(6) 0.014(5) 0.004(6)
C20 0.059(10) 0.052(10) 0.023(7) 0.013(6) 0.028(7) 0.017(8)
N6 0.013(5) 0.043(6) 0.015(5) -0.003(4) 0.006(4) -0.002(4)
C12 0.061(8) 0.083(9) 0.058(8) 0.015(7) 0.028(7) 0.030(7)
C14 0.030(8) 0.078(12) 0.028(8) 0.022(8) 0.014(6) 0.022(8)
C9 0.054(8) 0.097(10) 0.058(8) 0.016(8) 0.024(7) 0.016(8)
S1A 0.031(4) 0.055(5) 0.071(6) 0.007(4) 0.020(4) 0.001(4)
C1A 0.023(9) 0.027(9) 0.040(10) 0.006(8) 0.011(8) -0.007(8)
F3A 0.080(10) 0.092(11) 0.104(11) -0.013(9) 0.030(8) -0.008(8)
O1A 0.013(8) 0.037(10) 0.041(11) 0.018(9) 0.007(8) -0.001(8)
F1A 0.031(9) 0.082(14) 0.040(10) -0.024(9) 0.009(8) -0.022(9)
O2A 0.088(12) 0.090(13) 0.101(13) 0.007(9) 0.031(9) 0.003(9)
O3A 0.040(14) 0.088(19) 0.058(16) -0.002(14) -0.022(12) 0.024(13)
F2A 0.094(11) 0.111(12) 0.089(11) -0.006(9) 0.031(9) -0.007(9)
F5A 0.179(11) 0.164(11) 0.169(11) 0.004(8) 0.063(9) -0.029(9)
O6A 0.104(10) 0.158(11) 0.141(11) 0.008(8) 0.037(8) 0.018(8)
O4A 0.175(12) 0.150(12) 0.180(12) -0.039(9) 0.065(9) 0.020(9)
O5A 0.130(10) 0.157(11) 0.144(11) 0.033(8) 0.076(8) -0.012(8)
F4A 0.172(11) 0.192(12) 0.169(11) 0.000(9) 0.060(9) -0.010(9)
F6A 0.222(13) 0.189(13) 0.198(13) -0.005(9) 0.073(9) 0.013(9)
S2A 0.084(4) 0.111(5) 0.122(5) -0.032(4) 0.039(4) -0.008(4)
C2A 0.158(16) 0.160(16) 0.151(16) -0.007(10) 0.055(10) 0.002(10)
O2 0.013(4) 0.040(5) 0.029(4) -0.009(4) 0.014(3) -0.004(3)
N8 0.043(15) 0.08(2) 0.021(13) 0.001(13) 0.021(11) 0.009(15)
C34 0.07(2) 0.06(2) 0.028(17) -0.024(15) 0.028(17) -0.004(19)
C33 0.033(14) 0.028(14) 0.036(15) -0.011(12) 0.017(12) -0.001(12)
N8B 0.037(9) 0.051(10) 0.041(9) -0.004(8) 0.017(8) 0.000(8)
C33B 0.037(10) 0.043(11) 0.050(11) -0.010(8) 0.019(8) -0.002(8)
C34B 0.047(11) 0.051(11) 0.060(12) -0.016(9) 0.023(9) 0.008(9)
N1S 0.32(3) 0.32(3) 0.32(3) -0.009(10) 0.103(13) 0.001(10)
C1S 0.170(18) 0.168(18) 0.170(18) -0.003(10) 0.047(10) -0.006(10)
C3S 0.106(11) 0.091(11) 0.106(11) -0.022(9) 0.041(9) 0.008(9)
C2S 0.158(16) 0.153(16) 0.148(16) -0.005(10) 0.060(10) 0.007(10)
N2S 0.155(14) 0.155(14) 0.169(14) -0.005(9) 0.051(10) 0.006(9)
C35 0.030(8) 0.107(17) 0.075(13) -0.014(11) 0.029(9) -0.002(9)
C36 0.042(8) 0.042(9) 0.040(8) 0.015(6) 0.027(7) 0.011(6)
C35B 0.030(8) 0.107(17) 0.075(13) -0.014(11) 0.029(9) -0.002(9)
C36B 0.042(8) 0.042(9) 0.040(8) 0.015(6) 0.027(7) 0.011(6)
O1S 0.0074(15) 0.0074(15) 0.0074(15) 0 0.0024(5) 0
C4S 0.024(4) 0.019(4) 0.021(4) 0 -0.002(4) 0


#----------------------------------------------------------------------------#
#                   MOLECULAR GEOMETRY                                       #
#----------------------------------------------------------------------------#

_geom_special_details
;
 All esds (except the esd in the dihedral angle between two l.s. planes)
 are estimated using the full covariance matrix.  The cell esds are taken
 into account individually in the estimation of esds in distances, angles
 and torsion angles; correlations between esds in cell parameters are only
 used when they are defined by crystal symmetry.  An approximate (isotropic)
 treatment of cell esds is used for estimating esds involving l.s. planes.
;
loop_
    _geom_bond_atom_site_label_1
    _geom_bond_atom_site_label_2
    _geom_bond_distance
    _geom_bond_site_symmetry_2
    _geom_bond_publ_flag
Yb1 O1 2.178(8) 7 ?
Yb1 O1 2.178(8) . ?
Yb1 O2 2.197(8) . ?
Yb1 O2 2.197(8) 7 ?
Yb1 N1 2.340(10) . ?
Yb1 N1 2.340(10) 7 ?
Fe1 C1 1.871(11) . ?
Fe1 C2 1.907(15) . ?
Fe1 N6 1.969(10) . ?
Fe1 N3 1.985(11) . ?
Fe1 N5 1.995(11) . ?
Fe1 N4 2.002(13) . ?
O1 C27 1.284(14) . ?
N1 C1 1.173(16) . ?
N2 C2 1.155(18) . ?
C32 O2 1.261(17) . ?
C32 C36B 1.32(2) . ?
C32 C36 1.32(2) . ?
C32 C33 1.51(3) . ?
C32 C33B 1.61(3) . ?
C7 C11 1.29(2) . ?
C7 N3 1.39(2) . ?
C7 C6 1.45(2) . ?
C22 C24 1.38(2) . ?
C22 C23 1.396(19) . ?
C22 C21 1.48(2) . ?
C31 C30 1.32(2) . ?
C31 C27 1.417(19) . ?
C30 N7 1.34(2) . ?
N5 C15 1.341(17) . ?
N5 C19 1.347(17) . ?
C28 C29 1.35(2) . ?
C28 C27 1.396(18) . ?
C11 N4 1.377(18) . ?
C11 C10 1.49(2) . ?
N4 C14 1.31(2) . ?
C5 C4 1.24(3) . ?
C5 C6 1.31(3) . ?
C13 C12 1.40(3) . ?
C13 C14 1.42(2) . ?
C4 C3 1.47(2) . ?
C16 C15 1.38(2) . ?
C16 C17 1.39(2) . ?
C10 C12 1.31(3) . ?
C10 C9 1.46(2) . ?
C23 N6 1.378(15) . ?
C23 C19 1.413(18) . ?
C8 C9 1.26(3) . ?
C8 C6 1.45(3) . ?
C25 C26 1.384(18) . ?
C25 C24 1.39(2) . ?
C21 C20 1.31(2) . ?
N7 C29 1.34(2) . ?
C3 N3 1.35(2) . ?
C26 N6 1.334(16) . ?
C18 C19 1.398(18) . ?
C18 C17 1.41(2) . ?
C18 C20 1.45(2) . ?
S1A O1A 1.37(2) . ?
S1A O3A 1.47(2) . ?
S1A O2A 1.50(3) . ?
S1A C1A 1.63(3) . ?
C1A F3A 1.25(3) . ?
C1A F2A 1.33(4) . ?
C1A F1A 1.37(3) . ?
O2A O2A 1.18(6) 5_666 ?
F5A C2A 1.326(17) . ?
O6A S2A 1.384(12) . ?
O4A S2A 1.370(13) . ?
O5A S2A 1.360(13) . ?
F4A C2A 1.346(17) . ?
F6A C2A 1.355(17) . ?
S2A C2A 1.754(16) . ?
N8 C35 1.31(3) . ?
N8 C34 1.34(4) . ?
C34 C33 1.33(4) . ?
N8B C34B 1.44(4) . ?
N8B C35B 1.55(3) . ?
C33B C34B 1.32(4) . ?
N1S C1S 1.223(18) . ?
C1S C2S 1.389(18) . ?
C3S N2S 1.17(2) . ?
C3S C2S 1.420(17) . ?
C35 C36 1.35(2) . ?
C35B C36B 1.35(2) . ?
O1S C4S 1.385(14) . ?

loop_
    _geom_angle_atom_site_label_1
    _geom_angle_atom_site_label_2
    _geom_angle_atom_site_label_3
    _geom_angle
    _geom_angle_site_symmetry_1
    _geom_angle_site_symmetry_3
    _geom_angle_publ_flag
O1 Yb1 O1 180 7 . ?
O1 Yb1 O2 90.1(3) 7 . ?
O1 Yb1 O2 89.9(3) . . ?
O1 Yb1 O2 89.9(3) 7 7 ?
O1 Yb1 O2 90.1(3) . 7 ?
O2 Yb1 O2 180 . 7 ?
O1 Yb1 N1 91.2(3) 7 . ?
O1 Yb1 N1 88.8(3) . . ?
O2 Yb1 N1 86.9(3) . . ?
O2 Yb1 N1 93.1(3) 7 . ?
O1 Yb1 N1 88.8(3) 7 7 ?
O1 Yb1 N1 91.2(3) . 7 ?
O2 Yb1 N1 93.1(3) . 7 ?
O2 Yb1 N1 86.9(3) 7 7 ?
N1 Yb1 N1 180 . 7 ?
C1 Fe1 C2 89.3(6) . . ?
C1 Fe1 N6 93.3(5) . . ?
C2 Fe1 N6 93.2(5) . . ?
C1 Fe1 N3 92.3(5) . . ?
C2 Fe1 N3 93.8(6) . . ?
N6 Fe1 N3 171.0(5) . . ?
C1 Fe1 N5 175.5(5) . . ?
C2 Fe1 N5 90.5(5) . . ?
N6 Fe1 N5 82.2(4) . . ?
N3 Fe1 N5 92.2(4) . . ?
C1 Fe1 N4 92.4(5) . . ?
C2 Fe1 N4 174.5(5) . . ?
N6 Fe1 N4 92.0(5) . . ?
N3 Fe1 N4 80.8(6) . . ?
N5 Fe1 N4 88.3(5) . . ?
C27 O1 Yb1 148.3(8) . . ?
C1 N1 Yb1 164.3(9) . . ?
N1 C1 Fe1 178.4(13) . . ?
O2 C32 C36B 129.4(15) . . ?
O2 C32 C36 129.4(15) . . ?
O2 C32 C33 119.2(15) . . ?
C36 C32 C33 102.7(16) . . ?
O2 C32 C33B 110.6(16) . . ?
C36B C32 C33B 113.8(16) . . ?
C11 C7 N3 116.9(13) . . ?
C11 C7 C6 122.4(17) . . ?
N3 C7 C6 120.7(16) . . ?
C24 C22 C23 118.8(13) . . ?
C24 C22 C21 124.1(14) . . ?
C23 C22 C21 117.1(13) . . ?
C30 C31 C27 122.4(15) . . ?
C31 C30 N7 121.0(15) . . ?
C15 N5 C19 118.4(11) . . ?
C15 N5 Fe1 128.4(10) . . ?
C19 N5 Fe1 113.1(8) . . ?
C29 C28 C27 122.0(14) . . ?
C7 C11 N4 119.0(15) . . ?
C7 C11 C10 124.0(15) . . ?
N4 C11 C10 116.9(15) . . ?
C14 N4 C11 119.3(13) . . ?
C14 N4 Fe1 129.7(9) . . ?
C11 N4 Fe1 110.9(11) . . ?
C4 C5 C6 129(2) . . ?
C12 C13 C14 117(2) . . ?
N2 C2 Fe1 177.7(13) . . ?
C5 C4 C3 120(2) . . ?
C15 C16 C17 120.3(14) . . ?
C12 C10 C9 125.0(18) . . ?
C12 C10 C11 122.2(16) . . ?
C9 C10 C11 112.7(18) . . ?
O1 C27 C28 122.6(12) . . ?
O1 C27 C31 123.3(12) . . ?
C28 C27 C31 114.0(12) . . ?
N6 C23 C22 122.1(11) . . ?
N6 C23 C19 116.1(11) . . ?
C22 C23 C19 121.8(12) . . ?
C9 C8 C6 128.2(19) . . ?
C5 C6 C8 134(2) . . ?
C5 C6 C7 114(2) . . ?
C8 C6 C7 111.7(19) . . ?
C26 C25 C24 118.6(14) . . ?
N5 C15 C16 121.5(14) . . ?
C22 C24 C25 119.5(14) . . ?
C20 C21 C22 120.6(14) . . ?
C30 N7 C29 120.1(13) . . ?
N3 C3 C4 116.2(19) . . ?
N6 C26 C25 123.8(12) . . ?
N7 C29 C28 120.4(15) . . ?
C19 C18 C17 116.2(14) . . ?
C19 C18 C20 117.8(13) . . ?
C17 C18 C20 125.9(13) . . ?
C3 N3 C7 120.1(13) . . ?
C3 N3 Fe1 127.7(13) . . ?
C7 N3 Fe1 112.1(10) . . ?
C16 C17 C18 119.1(13) . . ?
N5 C19 C18 124.3(13) . . ?
N5 C19 C23 115.7(11) . . ?
C18 C19 C23 119.9(12) . . ?
C21 C20 C18 122.7(13) . . ?
C26 N6 C23 117.1(10) . . ?
C26 N6 Fe1 130.2(8) . . ?
C23 N6 Fe1 112.5(8) . . ?
C10 C12 C13 119.5(18) . . ?
N4 C14 C13 124.6(15) . . ?
C8 C9 C10 121(2) . . ?
O1A S1A O3A 113.1(14) . . ?
O1A S1A O2A 117.4(15) . . ?
O3A S1A O2A 108.7(18) . . ?
O1A S1A C1A 108.8(14) . . ?
O3A S1A C1A 104.4(15) . . ?
O2A S1A C1A 103.4(17) . . ?
F3A C1A F2A 97(2) . . ?
F3A C1A F1A 98(2) . . ?
F2A C1A F1A 106(2) . . ?
F3A C1A S1A 123(2) . . ?
F2A C1A S1A 112(2) . . ?
F1A C1A S1A 117.8(19) . . ?
O2A O2A S1A 133(4) 5_666 . ?
O5A S2A O4A 110.2(12) . . ?
O5A S2A O6A 112.8(11) . . ?
O4A S2A O6A 113.1(12) . . ?
O5A S2A C2A 117.3(13) . . ?
O4A S2A C2A 103.6(14) . . ?
O6A S2A C2A 99.1(10) . . ?
F5A C2A F4A 104.7(16) . . ?
F5A C2A F6A 101.7(15) . . ?
F4A C2A F6A 106.3(16) . . ?
F5A C2A S2A 114.5(14) . . ?
F4A C2A S2A 114.8(14) . . ?
F6A C2A S2A 113.5(14) . . ?
C32 O2 Yb1 140.0(10) . . ?
C35 N8 C34 118(2) . . ?
C33 C34 N8 119(3) . . ?
C34 C33 C32 126(3) . . ?
C34B N8B C35B 124(2) . . ?
C34B C33B C32 121(3) . . ?
C33B C34B N8B 117(3) . . ?
N1S C1S C2S 158(5) . . ?
N2S C3S C2S 170(4) . . ?
C1S C2S C3S 105(3) . . ?
N8 C35 C36 118.8(19) . . ?
C32 C36 C35 127.6(16) . . ?
C36B C35B N8B 110.8(18) . . ?
C32 C36B C35B 127.6(16) . . ?

_iucr_refine_instructions_details
;
TITL MLKS342_11_0m_b.res in C2/c
    shelx.res
    created by SHELXL-2018/3 at 15:01:34 on 12-Mar-2021
CELL  0.71073  23.7146  21.4669  18.1322   90.000  108.719   90.000
ZERR     2.00   0.0009   0.0009   0.0007    0.000    0.001    0.000
LATT   7
SYMM  - X,   Y, 1/2 - Z
SFAC  C    H    F    FE   N    O    S    YB
UNIT  328 240 36 8 80 56 12 4
MERG   2
EADP c35 c35b
EADP c36 c36b
EXYZ c35 c35b
EXYZ c36 c36b
DFIX  1.7 S2A C2A
DFIX 1.3 c2a f4a
DFIX 1.3 c2a f5a
DFIX 1.3 c2a f6a
DFIX 1.4 s2a o4a
DFIX 1.4 s2a o5a
DFIX 1.4 s2a o6a
DFIX 2.1 f4a f5a
DFIX 2.1 f4a f6a
DFIX 2.1 f5a f6a
DFIX 2.2 o4a o5a
DFIX 2.2 o4a o6a
DFIX 2.2 o5a o6a
DFIX 2.8 o6a f6a
DFIX 2.8 o6a f5a
DFIX 2.6 s2a f4a
DFIX 2.6 s2a f5a
DFIX 2.6 s2a f6a
DFIX 1.4 c1s c2s
DFIX 1.4 c3s c2s
DFIX 2.6 n1s c2s
DFIX 2.6 n2s c2s
DFIX 1.2 n1s c1s
FLAT c32 c33 c34 n8 c35 c36
FLAT c32 c33b c34b n8b c35b c36b
ISOR 0.01 0.01 c1a c2a f4a f6a f5a o6a s2a o4a
ISOR 0.01 0.01 f2a f3a o2a o5a
ISOR 0.01 0.01 n1s n2s c1s c2s c3s
ISOR 0.01 0.01 c32 c33b c34b n8b
ISOR 0.01 0.01 c8 c9 c6 c7 c10 c12 c5
ISOR 0.01 0.01 c4 c11 o2 c2
ISOR  0.0001 0.0001 O1S
SIMU  0.002 0.002 O1S
DELU  0.005 0.005 O1S C4S
SIMU  0.005 0.005 O1S C4S
DFIX  1.4 O1S C4S
FMAP   2
PLAN   30
SIZE     0.110   0.120   0.420
ACTA
BOND
LIST   4
L.S.  20
TEMP    23.00
WGHT    0.092300  458.431610
FVAR       0.09934
YB1   8    0.250000    0.250000    0.000000    10.50000    0.01182    0.01973 =
         0.01344   -0.00463    0.00504   -0.00235
FE1   4    0.334776    0.249382    0.310043    11.00000    0.02591    0.06242 =
         0.01838   -0.01506    0.00874   -0.01166
O1    6    0.204691    0.167661    0.023056    11.00000    0.01371    0.02290 =
         0.02430    0.00005    0.00654   -0.00076
N1    5    0.301101    0.257293    0.133602    11.00000    0.02278    0.02319 =
         0.03277   -0.00709    0.00659    0.00119
N2    5    0.282977    0.379631    0.313111    11.00000    0.05953    0.04077 =
         0.02988   -0.01789    0.02457   -0.01943
C1    1    0.314663    0.254964    0.201709    11.00000    0.02444    0.03636 =
         0.01884    0.00049    0.00765   -0.00271
C32   1    0.146207    0.309893    0.060693    11.00000    0.05026    0.06297 =
         0.06286   -0.03154    0.03304   -0.01533
C7    1    0.457685    0.234622    0.335487    11.00000    0.02727    0.06691 =
         0.01929    0.00649    0.00603    0.01176
C22   1    0.211542    0.154152    0.386648    11.00000    0.03124    0.05193 =
         0.02653    0.00594    0.00730    0.00676
C31   1    0.263045    0.082980    0.091489    11.00000    0.02643    0.06450 =
         0.06663    0.03055    0.00369   -0.00007
AFIX  43
H31   2    0.298251    0.102216    0.091766    11.00000   -1.20000
AFIX   0
C30   1    0.265840    0.027793    0.124217    11.00000    0.04515    0.05346 =
         0.07742    0.04557   -0.00715    0.00411
AFIX  43
H30   2    0.302804    0.009852    0.148848    11.00000   -1.20000
AFIX   0
N5    5    0.349784    0.240686    0.424275    11.00000    0.03358    0.06357 =
         0.02084   -0.01179    0.01220   -0.01002
C28   1    0.158243    0.079597    0.054971    11.00000    0.02635    0.01911 =
         0.09811    0.01228    0.02286    0.00202
AFIX  43
H28   2    0.120644    0.096222    0.030577    11.00000   -1.20000
AFIX   0
C11   1    0.437818    0.178283    0.329596    11.00000    0.03937    0.06835 =
         0.01947    0.01310    0.00900    0.00526
N4    5    0.377644    0.168586    0.313186    11.00000    0.02054    0.07377 =
         0.00686    0.01002    0.00102    0.00862
C5    1    0.532511    0.308363    0.355248    11.00000    0.06582    0.10560 =
         0.06015   -0.00239    0.02882   -0.00209
AFIX  43
H5    2    0.572228    0.318582    0.363916    11.00000   -1.20000
AFIX   0
C13   1    0.392301    0.057356    0.310645    11.00000    0.06020    0.09246 =
         0.04678    0.03920    0.02698    0.04456
AFIX  43
H13   2    0.375312    0.017854    0.302739    11.00000   -1.20000
AFIX   0
C2    1    0.301310    0.329987    0.311301    11.00000    0.03400    0.04631 =
         0.01984   -0.01286    0.01435   -0.01030
C4    1    0.497860    0.353137    0.347496    11.00000    0.05177    0.07993 =
         0.04382   -0.00641    0.01721   -0.01541
AFIX  43
H4    2    0.512499    0.393635    0.351930    11.00000   -1.20000
AFIX   0
C16   1    0.398972    0.253869    0.559955    11.00000    0.04693    0.08637 =
         0.02989   -0.03310    0.00827   -0.00472
AFIX  43
H16   2    0.430674    0.270583    0.599662    11.00000   -1.20000
AFIX   0
C10   1    0.475835    0.122027    0.336718    11.00000    0.03619    0.08271 =
         0.03657    0.01374    0.01533    0.01225
C27   1    0.208367    0.114113    0.055876    11.00000    0.03182    0.02159 =
         0.01966   -0.01075    0.00951   -0.00007
C23   1    0.258753    0.188469    0.377216    11.00000    0.02194    0.04207 =
         0.01823   -0.00346    0.00465    0.00193
C8    1    0.555952    0.192751    0.360853    11.00000    0.04051    0.09767 =
         0.04155    0.00401    0.01573    0.01185
AFIX  43
H8    2    0.596746    0.198671    0.372668    11.00000   -1.20000
AFIX   0
C6    1    0.520538    0.248816    0.352835    11.00000    0.06590    0.10190 =
         0.04544    0.00547    0.02610   -0.00576
C25   1    0.166775    0.154558    0.248366    11.00000    0.02506    0.05430 =
         0.05235    0.00320    0.00403   -0.01595
AFIX  43
H25   2    0.136155    0.143259    0.203684    11.00000   -1.20000
AFIX   0
C15   1    0.394493    0.264577    0.483043    11.00000    0.03747    0.06092 =
         0.02510   -0.01781    0.01011   -0.00933
AFIX  43
H15   2    0.423160    0.288912    0.471846    11.00000   -1.20000
AFIX   0
C24   1    0.165952    0.136165    0.321436    11.00000    0.04335    0.06134 =
         0.05357    0.00290    0.02476   -0.01830
AFIX  43
H24   2    0.134852    0.111888    0.326285    11.00000   -1.20000
AFIX   0
C21   1    0.215032    0.137598    0.467057    11.00000    0.03468    0.06094 =
         0.04732    0.01092    0.01927   -0.00618
AFIX  43
H21   2    0.185651    0.112686    0.475609    11.00000   -1.20000
AFIX   0
N7    5    0.216246   -0.002906    0.122575    11.00000    0.06573    0.03255 =
         0.02431    0.01320    0.01978    0.00439
AFIX  43
H7    2    0.218759   -0.039198    0.143471    11.00000   -1.20000
AFIX   0
C3    1    0.433782    0.342299    0.331334    11.00000    0.05343    0.10389 =
         0.03489   -0.02687    0.03130   -0.03729
AFIX  43
H3    2    0.406905    0.374985    0.325031    11.00000   -1.20000
AFIX   0
C26   1    0.214142    0.190060    0.243484    11.00000    0.03176    0.03943 =
         0.02458    0.00665    0.01318   -0.00719
AFIX  43
H26   2    0.213758    0.203362    0.194513    11.00000   -1.20000
AFIX   0
C29   1    0.162669    0.022925    0.088360    11.00000    0.05479    0.03266 =
         0.09305   -0.00183    0.04459   -0.00619
AFIX  43
H29   2    0.128375    0.001590    0.087682    11.00000   -1.20000
AFIX   0
C18   1    0.308331    0.193490    0.517184    11.00000    0.03718    0.06378 =
         0.01991   -0.01252    0.01510    0.00747
N3    5    0.416181    0.282052    0.326164    11.00000    0.02882    0.08793 =
         0.01186   -0.01243    0.00671   -0.03330
C17   1    0.356294    0.218234    0.578154    11.00000    0.04383    0.07910 =
         0.01608   -0.00620    0.01571    0.00939
AFIX  43
H17   2    0.359316    0.210806    0.629814    11.00000   -1.20000
AFIX   0
C19   1    0.307104    0.208145    0.441551    11.00000    0.02846    0.04416 =
         0.02013   -0.00321    0.01390    0.00403
C20   1    0.258992    0.157619    0.526258    11.00000    0.05906    0.05229 =
         0.02329    0.01348    0.02796    0.01697
AFIX  43
H20   2    0.258716    0.148548    0.576295    11.00000   -1.20000
AFIX   0
N6    5    0.260315    0.206317    0.304906    11.00000    0.01272    0.04292 =
         0.01537   -0.00295    0.00602   -0.00234
C12   1    0.453826    0.065739    0.328062    11.00000    0.06063    0.08276 =
         0.05816    0.01463    0.02829    0.03001
AFIX  43
H12   2    0.478788    0.031447    0.333413    11.00000   -1.20000
AFIX   0
C14   1    0.357022    0.111465    0.305564    11.00000    0.03023    0.07807 =
         0.02783    0.02215    0.01434    0.02235
AFIX  43
H14   2    0.316404    0.106075    0.296167    11.00000   -1.20000
AFIX   0
C9    1    0.538583    0.137167    0.353882    11.00000    0.05387    0.09672 =
         0.05801    0.01563    0.02357    0.01559
AFIX  43
H9    2    0.566175    0.105226    0.359763    11.00000   -1.20000
AFIX   0
PART    1
S1A   7    0.487894    0.418176    0.539140    10.50000    0.03129    0.05489 =
         0.07054    0.00729    0.01989    0.00055
C1A   1    0.493160    0.440585    0.627242    10.50000    0.02341    0.02683 =
         0.04049    0.00611    0.01093   -0.00654
F3A   3    0.459838    0.481180    0.640707    10.50000    0.07989    0.09234 =
         0.10428   -0.01337    0.03028   -0.00775
O1A   6    0.519399    0.363962    0.543702    10.50000    0.01322    0.03695 =
         0.04090    0.01820    0.00681   -0.00144
F1A   3    0.546591    0.463931    0.673082    10.50000    0.03067    0.08214 =
         0.03958   -0.02419    0.00866   -0.02199
O2A   6    0.508631    0.473967    0.505475    10.50000    0.08778    0.09032 =
         0.10066    0.00695    0.03068    0.00284
O3A   6    0.423527    0.410281    0.499829    10.50000    0.04030    0.08780 =
         0.05834   -0.00234   -0.02194    0.02398
F2A   3    0.479891    0.394658    0.668292    10.50000    0.09415    0.11148 =
         0.08909   -0.00553    0.03084   -0.00706
PART    2
F5A   3    0.055014    0.525184   -0.007648    11.00000    0.17857    0.16399 =
         0.16870    0.00409    0.06312   -0.02868
O6A   6    0.022290    0.567322   -0.164355    11.00000    0.10358    0.15780 =
         0.14085    0.00761    0.03724    0.01815
O4A   6    0.092590    0.489599   -0.138049    11.00000    0.17483    0.14985 =
         0.18042   -0.03917    0.06512    0.01966
O5A   6    0.117807    0.586307   -0.161621    11.00000    0.12967    0.15693 =
         0.14449    0.03325    0.07635   -0.01219
F4A   3    0.144974    0.551877    0.015769    11.00000    0.17202    0.19200 =
         0.16870    0.00002    0.05973   -0.01023
F6A   3    0.073314    0.619071   -0.016522    11.00000    0.22157    0.18862 =
         0.19802   -0.00529    0.07329    0.01300
S2A   7    0.081842    0.551802   -0.132293    11.00000    0.08387    0.11131 =
         0.12220   -0.03196    0.03934   -0.00795
C2A   1    0.089674    0.561750   -0.033507    11.00000    0.15786    0.16026 =
         0.15101   -0.00704    0.05462    0.00173
PART    0
O2    6    0.181388    0.309462    0.021281    11.00000    0.01275    0.03982 =
         0.02909   -0.00927    0.01424   -0.00397
PART    1
N8    5    0.092553    0.296143    0.180673    10.50000    0.04250    0.08244 =
         0.02149    0.00075    0.02120    0.00948
AFIX  43
H8A   2    0.075045    0.290763    0.215022    10.50000   -1.20000
AFIX   0
C34   1    0.139727    0.333626    0.194251    10.50000    0.07497    0.06356 =
         0.02771   -0.02364    0.02789   -0.00433
AFIX  43
H34   2    0.154710    0.354178    0.241700    10.50000   -1.20000
AFIX   0
C33   1    0.165129    0.341282    0.139072    10.50000    0.03262    0.02828 =
         0.03635   -0.01141    0.01652   -0.00066
AFIX  43
H33   2    0.197359    0.368389    0.149963    10.50000   -1.20000
AFIX   0
PART    2
N8B   5    0.055067    0.335721    0.122691    10.50000    0.03706    0.05077 =
         0.04118   -0.00365    0.01741   -0.00011
AFIX  43
H8B   2    0.029203    0.341702    0.146084    10.50000   -1.20000
AFIX   0
C33B  1    0.122827    0.379479    0.066935    10.50000    0.03736    0.04349 =
         0.04970   -0.00960    0.01925   -0.00183
AFIX  43
H33B  2    0.140774    0.413108    0.050987    10.50000   -1.20000
AFIX   0
C34B  1    0.078323    0.389191    0.094549    10.50000    0.04668    0.05077 =
         0.06046   -0.01602    0.02252    0.00839
AFIX  43
H34B  2    0.062786    0.428821    0.095702    10.50000   -1.20000
AFIX   0
PART    0
N1S   5    0.378182    0.463898    0.116503    11.00000    0.32184    0.32338 =
         0.32201   -0.00940    0.10288    0.00127
C1S   1    0.340846    0.440506    0.141352    11.00000    0.17020    0.16840 =
         0.17032   -0.00253    0.04679   -0.00579
C3S   1    0.257033    0.474030    0.158920    11.00000    0.10579    0.09102 =
         0.10613   -0.02164    0.04135    0.00811
C2S   1    0.285241    0.420254    0.141496    11.00000    0.15832    0.15337 =
         0.14820   -0.00531    0.06021    0.00735
AFIX  23
H2S1  2    0.289202    0.388307    0.180672    11.00000   -1.20000
H2S2  2    0.262556    0.403472    0.091018    11.00000   -1.20000
AFIX   0
N2S   5    0.228519    0.512012    0.177005    11.00000    0.15499    0.15477 =
         0.16864   -0.00462    0.05131    0.00632
PART    1
C35   1    0.073941    0.267919    0.113283    10.50000    0.03048    0.10677 =
         0.07544   -0.01376    0.02871   -0.00175
AFIX  43
H35   2    0.036505    0.249443    0.096203    10.50000   -1.20000
AFIX   0
C36   1    0.109963    0.266067    0.068984    10.50000    0.04202    0.04234 =
         0.04049    0.01516    0.02747    0.01115
AFIX  43
H36   2    0.109083    0.229552    0.041035    10.50000   -1.20000
AFIX   0
PART    2
C35B  1    0.073941    0.267919    0.113283    10.50000    0.03048    0.10677 =
         0.07544   -0.01376    0.02871   -0.00175
AFIX  43
H35B  2    0.062047    0.233204    0.135205    10.50000   -1.20000
AFIX   0
C36B  1    0.109963    0.266067    0.068984    10.50000    0.04202    0.04234 =
         0.04049    0.01516    0.02747    0.01115
AFIX  43
H36B  2    0.109083    0.229552    0.041035    10.50000   -1.20000
AFIX   0
PART    0
O1S   6    0.000000    0.264420    0.250000    10.50000    0.00740    0.00741 =
         0.00741    0.00000    0.00238    0.00000
AFIX 147
H4S1  2    0.010190    0.277153    0.295003    10.50000   -1.50000
AFIX   0
C4S   1    0.000000    0.199900    0.250000    10.50000    0.02355    0.01855 =
         0.02135    0.00000   -0.00236    0.00000
AFIX 133
H4S2  2    0.040001    0.184993    0.260742    10.50000   -1.50000
H4S3  2   -0.024229    0.184993    0.199944    10.50000   -1.50000
H4S4  2   -0.015772    0.184993    0.289314    10.50000   -1.50000
AFIX   0
HKLF    4


REM  MLKS342_11_0m_b.res in C2/c
REM wR2 = 0.2559, GooF = S = 1.098, Restrained GooF = 1.115 for all data
REM R1 = 0.0979 for 5499 Fo > 4sig(Fo) and 0.1349 for all 7708 data
REM 657 parameters refined using 235 restraints

END

WGHT      0.0923    458.5078

REM Highest difference peak  2.056,  deepest hole -1.968,  1-sigma level  0.225
Q1    1   0.5829  0.4960  0.7066  11.00000  0.05    2.06
Q2    1   0.2190  0.5124  0.1005  11.00000  0.05    1.78
Q3    1   0.2515  0.2094  0.0044  11.00000  0.05    1.75
Q4    1   0.2565  0.2165 -0.0190  11.00000  0.05    1.68
Q5    1   0.1327  0.4706  0.0151  11.00000  0.05    1.42
Q6    1   0.2788  0.2501  0.0376  11.00000  0.05    1.42
Q7    1   0.5056  0.3891  0.5785  11.00000  0.05    1.40
Q8    1   0.0125  0.6087 -0.0804  11.00000  0.05    1.37
Q9    1   0.0134  0.6178 -0.0239  11.00000  0.05    1.33
Q10   1   0.5576  0.2263  0.3644  11.00000  0.05    1.28
Q11   1   0.0216  0.6180 -0.1614  11.00000  0.05    1.21
Q12   1   0.5363  0.3353  0.3610  11.00000  0.05    1.20
Q13   1   0.5402  0.1644  0.3624  11.00000  0.05    1.16
Q14   1   0.1777  0.5186  0.0425  11.00000  0.05    1.15
Q15   1   0.2676  0.4769  0.0949  11.00000  0.05    1.14
Q16   1   0.1097  0.5409 -0.1813  11.00000  0.05    1.08
Q17   1   0.4881  0.3719  0.5275  11.00000  0.05    1.06
Q18   1   0.5116  0.2210  0.3464  11.00000  0.05    1.05
Q19   1   0.5202  0.2771  0.3534  11.00000  0.05    1.02
Q20   1   0.3177  0.4719  0.1801  11.00000  0.05    0.99
Q21   1   0.0427  0.1703  0.2341  11.00000  0.05    0.96
Q22   1   0.5351  0.3611  0.5743  11.00000  0.05    0.96
Q23   1   0.4409  0.5015  0.5994  11.00000  0.05    0.92
Q24   1   0.5195  0.3356  0.5447  11.00000  0.05    0.90
Q25   1   0.5476  0.2790  0.3617  11.00000  0.05    0.90
Q26   1   0.3168  0.2915  0.3235  11.00000  0.05    0.87
Q27   1   0.5390  0.3766  0.5444  11.00000  0.05    0.86
Q28   1   0.4634  0.0942  0.3323  11.00000  0.05    0.86
Q29   1   0.0054  0.5997 -0.2397  11.00000  0.05    0.85
Q30   1   0.5519  0.4415  0.6993  11.00000  0.05    0.83
;

# END of CIF
