# Supplementary material
Source: MDPI journal article supplement (https://www.mdpi.com/2312-7481/7/6/79)
Supplement: s1 [file s1 › 1_MeCN.cif]

#\#CIF_1.1

#  CIF produced by WinGX routine CIF_UPDATE
#  Created on 2021-03-10 at 20:26:19
#  Using CIFtbx version 3.0.4  1 Sep 2006

#  Dictionary name : cif_core.dic
#  Dictionary vers : 2.4.5
#  Request file    : c:\wingx\files\archive.reqdat
#  CIF files read  : mlks253_12_0m_a project

#------------------ SECTION 1. GLOBAL INFORMATION ---------------------------#

data_global

#------------------ AUDIT DETAILS -------------------------------------------#

_audit_creation_date            2021-03-10
_audit_creation_method          'WinGX routine CIF_UPDATE'
_audit_conform_dict_name        cif_core.dic
_audit_conform_dict_version     2.4.3
_audit_conform_dict_location    ftp://ftp.iucr.org/pub/cif_core.dic
_audit_update_record            ?

#------------------ AUTHOR DETAILS -------------------------------------------#

# Name and address of author for correspondence

_publ_contact_author_name       'Liberka, Michal'
_publ_contact_author_address
;
Gronostajowa 2, 30-387 Krakow, Poland
;
_publ_contact_author_email       'michal.liberka@doctoral.uj.edu.pl'
_publ_contact_author_fax         ' '
_publ_contact_author_phone       ' '


# Insert blank lines between references

_publ_section_references
;
Blessing, R. H. (1995) Acta Cryst., A51, 33-38.

Blessing, R. H. (1987) Cryst. Rev. 1, 3-58.

Blessing, R. H. (1989) J. Appl. Cryst. 22, 396-397.

Bruker (2012) APEX2 (Version 2012.10-0), SAINT (version 8.27B), SADABS
(version 2012/1), BrukerAXS Inc, Madison, Wisconsin, USA.

ABSCOR: Higashi, T. (1995). ABSCOR. Rigaku Corporation, Tokyo, Japan.

CAD-4 Software: Enraf-Nonius (1989). CAD-4 Software (or CAD-4 EXPRESS).
Enraf-Nonius, Delft, The Netherlands.

Cambridge Structural Database: Allen, F. R. (2002). Acta Cryst. B58, 380-388.

CAMERON: Watkin, D. J., Prout, C. K. & Pearce, L. J. (1996). CAMERON.
Chemical Crystallography Laboratory, Oxford, England.

CrysAlis CCD, CrysAlis RED and associated programs: Oxford Diffraction (2006).
Program name(s). Oxford Diffraction Ltd, Abingdon, England.

CRYSTALS: Betteridge, P. W., Carruthers, J. R., Cooper, R. I., Prout, K. &
Watkin, D. J. (2003). J. Appl. Cryst. 36, 1487.

COLLECT: Nonius (1998). COLLECT. Nonius BV, Delft, The Netherlands.

DENZO/SCALEPACK:  Otwinowski, Z. & Minor, W. (1997). Methods in Enzymology,
Vol. 276, Macromolecular Crystallography, Part A, edited by C. W. Carter Jr
& R. M. Sweet, pp. 307-326. New York: Academic Press.

DIAMOND: Brandenburg, K.(2006). DIAMOND. Crystal Impact GbR, Bonn, Germany.

DIF4 and REDU4: Stoe & Cie (1991). Program name(s). Stoe & Cie, Darmstadt,
Germany.

DIFABS: Walker, N. &  Stuart, D. (1983). Acta Cryst., A39, 158 - 166.

DIRAX: Duisenberg, A. J. M. (1992). J. Appl. Cryst. 25, 92-96.

DIRDIF-2008: Beurskens, P.T., Beurskens, G., de Gelder, R., Garci\'ia-Granda,
S., Gould, R.O. & Smits, J.M.M. (2008) The DIRDIF-2008 program
system, Crystallography Laboratory, Radboud University  Nijmegen,
The Netherlands.

EDMA: Palatinus, L., Prathapa, S. J. & van Smaalen, S. (2012) J. Appl. Cryst.
45, 575-580.

enCIFer: Allen, F. H., Johnson, O., Shields, G. P., Smith, B. R. & Towler,
M. (2004). J. Appl. Cryst. 37, 335-338.

EVALCCD: Duisenberg, A. J. M., Kroon-Batenburg, L. M. J. & Schreurs,
A. M. M. (2003). J. Appl. Cryst. 36, 220-229.

JANA2000: Petricek, V. & Dusek, M. (2000). JANA2000. Institute of Physics,
Czech Academy of Sciences, Prague, Czech Republic.

MERCURY: Macrae, C. F., Bruno, I. J., Chisholm, J. A., Edgington,
P. R., McCabe, P., Pidcock, E., Rodriguez-Monge, L., Taylor, R.,
van de Streek, J. & Wood, P. A. (2008). J. Appl. Cryst. 41, 466-470.

MOGUL: Bruno, I. J., Cole, J. C., Kessler, M., Luo, J., Motherwell,
W. D. S., Purkis, L. H., Smith, B. R., Taylor, R., Cooper, R. I., Harris,
S. E. & Orpen, A. G. (2004). J. Chem. Inf. Comput. Sci. 44, 2133-2144.

ORTEPII: Johnson, C. K. (1976). ORTEPII. Report ORNL-5138. Oak Ridge
National Laboratory, Tennessee, USA.

ORTEPIII:  Burnett, M. N. & Johnson, C. K. (1996). ORTEPIII.
Report ORNL-6895. Oak Ridge National Laboratory, Tennessee, USA.

ORTEP-3: Farrugia, L. J. (2012). J. Appl. Cryst. 45, 849-854.

PARST: Nardelli, M. (1995). J. Appl. Cryst. 28, 659.

PLATON: Spek, A. L. (2009). Acta. Cryst. D65, 148-155.

PROCESS: Rigaku (1996). PROCESS. Rigaku Corporation, Tokyo, Japan.

PROCESS-AUTO: Rigaku (1998). PROCESS-AUTO. Rigaku Corporation, Tokyo, Japan.

PublCIF: Westrip, S. P. (2010). J. Appl. Cryst. 43, 920-925.

SCHAKAL: Keller, E. (1999) University of Freiburg, Germany.

SHELX: Sheldrick, G. M. (2008). Acta Cryst. A64, 112-122.

SHELXD: Schneider, T. R. & Sheldrick, G. M. (2002) Acta Cryst. D58, 1772-1779.

SIR92: Altomare, A., Cascarano, G., Giacovazzo, C., Guagliardi, A., Burla,
M. C., Polidori, G. & Camalli, M. (1994). J. Appl. Cryst. 27, 435.

SIR97: Altomare, A., Burla, M. C., Camalli, M., Cascarano, G. L.,
Giacovazzo, C., Guagliardi, A., Moliterni, A. G. G., Polidori, G. &
Spagna, R. (1999). J. Appl. Cryst. 32, 115-119.

SIR2002: Burla, M. C., Camalli, M., Carrozzini, B., Cascarano, G. L.,
Giacovazzo, C., Polidori, G. & Spagna, R. (2003). J. Appl. Cryst. 36, 1103.

SIR2004: Burla, M. C., Caliandro, R., Camalli, M., Carrozzini, B.,
Cascarano, G. L., De Caro, L., Giacovazzo, C., Polidori, G. & Spagna, R.
(2005). J. Appl. Cryst. 38, 381-388.

SIR2008 & IL MILIONE: Burla, M. C., Caliandro, R., Camalli, M., Carrozzini, B.,
Cascarano, G. L., De Caro, L., Giacovazzo, C., Polidori, G., Siliqi, D.,
& Spagna, R. (2007). J. Appl. Cryst. 40, 609-613.

SIR2011: Burla, M. C., Caliandro, R., Camalli, M., Carrozzini, B.,
Cascarano, G. L., Giacovazzo, C., Mallamo, M., Mazzone, A., Polidori, G.
& Spagna, R. (2012). J. Appl. Cryst. 45, 357-361.

SUPERFLIP: Palatinus, L. & Chapuis, G. (2007) J. Appl. Cryst. 40, 786-790.

TEXSAN: Molecular Structure Corporation & Rigaku (2000). TEXSAN. MSC,
The Woodlands, Texas, USA, and Rigaku Corporation, Tokyo, Japan.

WinGX: Farrugia, L. J. (2012). J. Appl. Cryst. 45, 849-854.

X-AREA, X-RED, X-RED32, X-SHAPE:  Stoe & Cie (2002). Program name(s).
Stoe & Cie GmbH, Darmstadt, Germany.

XCAD4: Harms, K. & Wocadlo, S. (1995). XCAD4. University of Marburg, Germany.

XSCANS: Siemens (1994). XSCANS. Siemens Analytical X-ray Instruments Inc.,
Madison, Wisconsin, USA.

;

#------------------  SECTION 2. COMPOUND(S) DETAILS -------------------------#

data_shelx

_audit_creation_date                    2021-03-10T20:26:19-00:00
_audit_creation_method                  'WinGX routine CIF_UPDATE'
_audit_conform_dict_name                cif_core.dic
_audit_conform_dict_version             2.4.5
_audit_conform_dict_location            ftp://ftp.iucr.org/pub/cif_core.dic
_publ_requested_category                FM

#----------------------------------------------------------------------------#
#                   CHEMICAL INFORMATION                                     #
#----------------------------------------------------------------------------#

_chemical_formula_moiety                'C72 H52 Fe2 N16 O4 Yb, 3(C F3 O3 S), 2(C2 H3 N)'
_chemical_formula_sum                   'C79 H58 F9 Fe2 N18 O13 S3 Yb'
_chemical_formula_weight                2019.35

#----------------------------------------------------------------------------#
#                   UNIT CELL INFORMATION                                    #
#----------------------------------------------------------------------------#

_symmetry_cell_setting                  monoclinic
_symmetry_space_group_name_H-M          'C 2/c'
_symmetry_space_group_name_Hall         '-C 2yc'
_symmetry_Int_Tables_number             15
loop_
    _symmetry_equiv_pos_as_xyz
'x, y, z'
'-x, y, -z+1/2'
'x+1/2, y+1/2, z'
'-x+1/2, y+1/2, -z+1/2'
'-x, -y, -z'
'x, -y, z-1/2'
'-x+1/2, -y+1/2, -z'
'x+1/2, -y+1/2, z-1/2'

_cell_length_a                          24.0591(18)
_cell_length_b                          21.8075(16)
_cell_length_c                          17.4040(13)
_cell_angle_alpha                       90
_cell_angle_beta                        112.174(2)
_cell_angle_gamma                       90
_cell_volume                            8456.0(11)
_cell_formula_units_Z                   4
_cell_measurement_temperature           100(2)
_cell_measurement_reflns_used           38975
_cell_measurement_theta_min             2.499
_cell_measurement_theta_max             25.027
_cell_measurement_wavelength            0.71073

#----------------------------------------------------------------------------#
#                   CRYSTAL INFORMATION                                      #
#----------------------------------------------------------------------------#

_exptl_crystal_description              needle	
_exptl_crystal_colour                   red
_exptl_crystal_size_max                 0.14
_exptl_crystal_size_mid                 0.12
_exptl_crystal_size_min                 0.05
_exptl_crystal_density_diffrn           1.586
_exptl_crystal_density_method           'not measured'
_exptl_crystal_F_000                    4052

#----------------------------------------------------------------------------#
#                   ABSORPTION CORRECTION                                    #
#----------------------------------------------------------------------------#

_exptl_absorpt_coefficient_mu           1.602
_exptl_absorpt_correction_type          'multi-scan' 
_exptl_absorpt_correction_T_min         0.5214
_exptl_absorpt_correction_T_max         0.7514
_exptl_absorpt_process_details          'TWINABS (Sheldrick, 2009)' 

#----------------------------------------------------------------------------#
#                   DATA COLLECTION                                          #
#----------------------------------------------------------------------------#

_diffrn_ambient_temperature             100(2)
_diffrn_radiation_wavelength            0.71073
_diffrn_radiation_type                  MoK\a
_diffrn_radiation_probe                 x-ray
_diffrn_radiation_monochromator         graphite
_diffrn_measurement_device_type   	'D8Quest Eco Photon50' 
_diffrn_measurement_method       	 \w 
_diffrn_standards_number                0
_diffrn_standards_interval_time         0
_diffrn_standards_interval_count        0
_diffrn_standards_decay_%               0
_diffrn_reflns_av_R_equivalents         0.058
_diffrn_reflns_av_unetI/netI            0.0516
_diffrn_reflns_number                   38975
_diffrn_reflns_limit_h_min              -28
_diffrn_reflns_limit_h_max              28
_diffrn_reflns_limit_k_min              -25
_diffrn_reflns_limit_k_max              25
_diffrn_reflns_limit_l_min              -20
_diffrn_reflns_limit_l_max              20
_diffrn_reflns_theta_min                2.499
_diffrn_reflns_theta_max                25.027
_diffrn_reflns_theta_full               25.027
_diffrn_measured_fraction_theta_full
                                        0.999
_diffrn_measured_fraction_theta_max
                                        0.999
_diffrn_reflns_Laue_measured_fraction_full
                                        0.999
_diffrn_reflns_Laue_measured_fraction_max
                                        0.999
_diffrn_reflns_point_group_measured_fraction_full
                                        0.999
_diffrn_reflns_point_group_measured_fraction_max
                                        0.999
_reflns_Friedel_coverage                0
_reflns_number_total                    7469
_reflns_number_gt                       4725
_reflns_threshold_expression            'I > 2\s(I)'

#----------------------------------------------------------------------------#
#                   COMPUTER PROGRAMS USED                                   #
#----------------------------------------------------------------------------#

_computing_structure_refinement         'SHELXL-2018/3 (Sheldrick, 2018)'
_computing_molecular_graphics           'Ortep for Windows (Farrugia, 2012)'
_computing_publication_material
                                   'WinGX publication routines (Farrugia, 2012)'

#----------------------------------------------------------------------------#
#                   STRUCTURE SOLUTION                                       #
#----------------------------------------------------------------------------#

_atom_sites_solution_hydrogens          geom

#----------------------------------------------------------------------------#
#                   REFINEMENT INFORMATION                                   #
#----------------------------------------------------------------------------#

_shelx_SHELXL_version_number            2018/3
_refine_ls_structure_factor_coef        Fsqd
_refine_ls_matrix_type                  full
_refine_ls_weighting_scheme             calc
_refine_ls_weighting_details
            'w=1/[\s^2^(Fo^2^)+(0.1425P)^2^+389.0904P] where P=(Fo^2^+2Fc^2^)/3'
_refine_ls_hydrogen_treatment           constr
_refine_ls_extinction_method            none
_refine_ls_number_reflns                7469
_refine_ls_number_parameters            601
_refine_ls_number_restraints            193
_refine_ls_number_constraints           0
_refine_ls_R_factor_all                 0.16
_refine_ls_R_factor_gt                  0.11
_refine_ls_wR_factor_ref                0.3358
_refine_ls_wR_factor_gt                 0.2882
_refine_ls_goodness_of_fit_ref          1.038
_refine_ls_restrained_S_all             1.123
_refine_ls_shift/su_max                 0.096
_refine_ls_shift/su_mean                0.001
_refine_diff_density_max                2.294
_refine_diff_density_min                -1.808
_refine_diff_density_rms                0.206

# start Validation Reply Form 
_vrf_PLAT234_shelx           
;
RESPONSE: Due to the high structural disorder involving trimethanesulfonate anions,
it was necessary to model these molecules from residual electron densities
in the crystal strucutre and allowing all of them to be partially populated,
resulting in slightly large differences of anisotropic displacement
parametres in part of neighbor atoms in trimethanesulfonate anions.
;
# end Validation Reply Form

# start Validation Reply Form 
_vrf_PLAT342_shelx           
;
RESPONSE: Low C-C bond precision can be caused by moderate structural
disorder involving trimethanesulfonate anions, which have been modeled
from residual electron densities in the crystal strucutre.
Alternatively, low C-C bond precision could be a result of the twinning
affecting in different degree spacially separated parts of the structure.  
;
# end Validation Reply Form

#----------------------------------------------------------------------------#
#                   CONSTRAINTS AND RESTRAINTS                               #
#----------------------------------------------------------------------------#


#----------------------------------------------------------------------------#
#                   ATOMIC TYPES, COORDINATES AND THERMAL PARAMETERS         #
#----------------------------------------------------------------------------#

loop_
    _atom_type_symbol
    _atom_type_description
    _atom_type_scat_dispersion_real
    _atom_type_scat_dispersion_imag
    _atom_type_scat_source
C C 0.0033 0.0016 'International Tables Vol C Tables 4.2.6.8 and 6.1.1.4'
Fe Fe 0.3463 0.8444 'International Tables Vol C Tables 4.2.6.8 and 6.1.1.4'
N N 0.0061 0.0033 'International Tables Vol C Tables 4.2.6.8 and 6.1.1.4'
S S 0.1246 0.1234 'International Tables Vol C Tables 4.2.6.8 and 6.1.1.4'
Yb Yb -0.385 5.5486 'International Tables Vol C Tables 4.2.6.8 and 6.1.1.4'
O O 0.0106 0.006 'International Tables Vol C Tables 4.2.6.8 and 6.1.1.4'
F F 0.0171 0.0103 'International Tables Vol C Tables 4.2.6.8 and 6.1.1.4'
H H 0 0 'International Tables Vol C Tables 4.2.6.8 and 6.1.1.4'

loop_
    _atom_site_label
    _atom_site_type_symbol
    _atom_site_fract_x
    _atom_site_fract_y
    _atom_site_fract_z
    _atom_site_U_iso_or_equiv
    _atom_site_adp_type
    _atom_site_occupancy
    _atom_site_site_symmetry_order
    _atom_site_calc_flag
    _atom_site_refinement_flags_posn
    _atom_site_refinement_flags_adp
    _atom_site_refinement_flags_occupancy
    _atom_site_disorder_assembly
    _atom_site_disorder_group
Yb1 Yb 0.25 0.75 0.5 0.0455(3) Uani 1 2 d S . P . .
Fe1 Fe 0.34568(8) 0.75381(9) 0.82717(12) 0.0412(5) Uani 1 1 d . . . . .
O2 O 0.3300(5) 0.7469(5) 0.4662(7) 0.058(3) Uani 1 1 d . . . . .
N3 N 0.2711(5) 0.7139(5) 0.8196(8) 0.048(3) Uani 1 1 d . . . . .
N1 N 0.3067(5) 0.7642(6) 0.6409(9) 0.055(3) Uani 1 1 d . . . . .
N5 N 0.3839(6) 0.6729(6) 0.8282(8) 0.051(3) Uani 1 1 d . . . . .
N2 N 0.2990(7) 0.8835(6) 0.8261(9) 0.066(4) Uani 1 1 d . . . . .
N6 N 0.4286(6) 0.7818(6) 0.8467(8) 0.056(3) Uani 1 1 d . . . . .
O1 O 0.2455(6) 0.8471(6) 0.4808(9) 0.087(4) Uani 1 1 d . U . . .
C2 C 0.3165(7) 0.8345(7) 0.8269(10) 0.052(4) Uani 1 1 d . . . . .
N7 N 0.2816(8) 1.0020(6) 0.3813(10) 0.076(5) Uani 1 1 d . . . . .
H7 H 0.287799 1.035284 0.359316 0.091 Uiso 1 1 calc R U . A 2
N4 N 0.3637(5) 0.7478(6) 0.9488(7) 0.051(3) Uani 1 1 d . . . . .
C7 C 0.2707(6) 0.6950(7) 0.8944(9) 0.049(4) Uani 1 1 d . . . . .
C32 C 0.3560(6) 0.7119(8) 0.4279(10) 0.055(4) Uani 1 1 d . . . . .
C18 C 0.4795(7) 0.6256(8) 0.8447(10) 0.054(4) Uani 1 1 d . . . . .
C3 C 0.2246(7) 0.6978(7) 0.7546(11) 0.055(4) Uani 1 1 d . . . . .
H3 H 0.224332 0.710066 0.703262 0.066 Uiso 1 1 calc R U . . .
C23 C 0.4663(6) 0.7380(7) 0.8494(8) 0.048(4) Uani 1 1 d . . . . .
C1 C 0.3228(6) 0.7602(6) 0.7113(11) 0.048(4) Uani 1 1 d . . . . .
C5 C 0.1775(8) 0.6453(7) 0.8319(12) 0.064(5) Uani 1 1 d . . . . .
H5 H 0.146486 0.621382 0.835339 0.077 Uiso 1 1 calc R U . . .
C22 C 0.5272(7) 0.7473(8) 0.8623(9) 0.057(4) Uani 1 1 d . . . . .
C4 C 0.1754(7) 0.6640(7) 0.7541(10) 0.053(4) Uani 1 1 d . . . . .
H4 H 0.143355 0.654528 0.7053 0.064 Uiso 1 1 calc R U . . .
C19 C 0.4437(7) 0.6765(8) 0.8424(9) 0.052(4) Uani 1 1 d . . . . .
C24 C 0.5488(8) 0.8064(8) 0.8700(10) 0.061(4) Uani 1 1 d . . . . .
H24 H 0.588635 0.814355 0.878117 0.074 Uiso 1 1 calc R U . . .
C17 C 0.4525(8) 0.5698(9) 0.8315(12) 0.071(5) Uani 1 1 d . . . . .
H17 H 0.474742 0.534592 0.833216 0.086 Uiso 1 1 calc R U . . .
C15 C 0.3594(8) 0.6170(8) 0.8142(10) 0.061(4) Uani 1 1 d . . . . .
H15 H 0.31865 0.612777 0.803055 0.074 Uiso 1 1 calc R U . . .
C20 C 0.5420(8) 0.6375(9) 0.8601(11) 0.068(5) Uani 1 1 d . . . . .
H20 H 0.567601 0.604345 0.866413 0.082 Uiso 1 1 calc R U . . .
C6 C 0.2242(8) 0.6614(8) 0.9030(12) 0.064(5) Uani 1 1 d . . . . .
C36 C 0.4075(8) 0.7314(9) 0.4186(12) 0.073(5) Uani 1 1 d . . . . .
H36 H 0.425489 0.76847 0.440798 0.088 Uiso 1 1 calc R U . . .
C27 C 0.2556(8) 0.8971(8) 0.4440(11) 0.064(4) Uani 1 1 d . . . . .
C11 C 0.3213(7) 0.7145(7) 0.9646(10) 0.055(4) Uani 1 1 d . . . . .
C8 C 0.2302(9) 0.6465(9) 0.9889(13) 0.074(6) Uani 1 1 d . . . . .
H8 H 0.200974 0.622915 0.997783 0.089 Uiso 1 1 calc R U . B 2
C26 C 0.4482(8) 0.8397(8) 0.8506(11) 0.065(4) Uani 1 1 d . . . . .
H26 H 0.42186 0.872258 0.843791 0.078 Uiso 1 1 calc R U . . .
C21 C 0.5639(8) 0.6928(9) 0.8655(10) 0.065(5) Uani 1 1 d . . . . .
H21 H 0.603688 0.697866 0.871496 0.078 Uiso 1 1 calc R U . . .
C29 C 0.3243(11) 0.9596(9) 0.4062(15) 0.092(7) Uani 1 1 d . . . . .
H29 H 0.361401 0.96622 0.402533 0.11 Uiso 1 1 calc R U . C 2
C14 C 0.4100(8) 0.7696(9) 1.0146(11) 0.067(5) Uani 1 1 d . . . . .
H14 H 0.439343 0.79284 1.00545 0.081 Uiso 1 1 calc R U . D 2
C25 C 0.5110(8) 0.8513(9) 0.8655(12) 0.074(5) Uani 1 1 d . . . . .
H25 H 0.524815 0.891514 0.8721 0.088 Uiso 1 1 calc R U . . .
C16 C 0.3928(9) 0.5654(9) 0.8158(14) 0.082(6) Uani 1 1 d . . . . .
H16 H 0.374369 0.527184 0.805938 0.098 Uiso 1 1 calc R U . . .
C35 C 0.4309(10) 0.6950(12) 0.3764(15) 0.098(7) Uani 1 1 d . . . . .
H35 H 0.467297 0.706393 0.373538 0.118 Uiso 1 1 calc R U . E 2
N1S N 0.7340(11) 0.5027(10) 0.6702(16) 0.125(8) Uani 1 1 d . . . F 1
C2S C 0.8275(16) 0.4536(15) 0.6702(18) 0.143(12) Uani 1 1 d . . . F 1
H2S1 H 0.859371 0.464842 0.721103 0.215 Uiso 1 1 calc R U . F 1
H2S2 H 0.837433 0.466214 0.624089 0.215 Uiso 1 1 calc R U . F 1
H2S3 H 0.822007 0.409951 0.668515 0.215 Uiso 1 1 calc R U . F 1
C1S C 0.7750(12) 0.4822(11) 0.6656(16) 0.094(7) Uani 1 1 d . . . F 1
C10 C 0.3243(8) 0.7011(9) 1.0452(12) 0.072(5) Uani 1 1 d . . . G 2
C9 C 0.2781(10) 0.6672(10) 1.0548(13) 0.077(5) Uani 1 1 d . . . G 2
H9 H 0.280138 0.658388 1.108074 0.092 Uiso 1 1 calc R U . G 2
C13 C 0.4152(9) 0.7586(11) 1.0939(11) 0.090(8) Uani 1 1 d . . . G 2
H13 H 0.448225 0.773797 1.137697 0.108 Uiso 1 1 calc R U . G 2
C31 C 0.2164(9) 0.9431(8) 0.4197(13) 0.077(5) Uani 1 1 d . . . H 2
H31 H 0.17901 0.939776 0.423677 0.093 Uiso 1 1 calc R U . H 2
N8 N 0.4054(11) 0.6438(11) 0.3386(15) 0.122(7) Uani 1 1 d . U . I 2
H8A H 0.421548 0.623268 0.310239 0.146 Uiso 1 1 calc R U . I 2
C33 C 0.3301(11) 0.6590(11) 0.3912(16) 0.100(7) Uani 1 1 d . U . I 2
H33 H 0.29525 0.645628 0.397147 0.12 Uiso 1 1 calc R U . I 2
C30 C 0.2311(9) 0.9940(9) 0.3895(12) 0.077(5) Uani 1 1 d . . . H 2
H30 H 0.203268 1.025732 0.373293 0.092 Uiso 1 1 calc R U . H 2
C12 C 0.3725(8) 0.7253(10) 1.1101(13) 0.077(5) Uani 1 1 d . . . G 2
H12 H 0.375911 0.719132 1.164552 0.093 Uiso 1 1 calc R U . G 2
C28 C 0.3117(10) 0.9038(9) 0.4388(12) 0.083(6) Uani 1 1 d . . . J 2
H28 H 0.340084 0.872608 0.456219 0.099 Uiso 1 1 calc R U . J 2
C34 C 0.3545(15) 0.6241(15) 0.344(2) 0.139(10) Uani 1 1 d . U . I 2
H34 H 0.335972 0.588285 0.318121 0.166 Uiso 1 1 calc R U . I 2
F1A F 0.6559(8) 0.5645(12) 0.5036(13) 0.226(11) Uani 0.9 1 d D U P K 2
O2A O 0.5078(8) 0.5710(12) 0.3282(15) 0.197(12) Uani 0.9 1 d D U P K 2
F2A F 0.5762(12) 0.5199(10) 0.4874(12) 0.237(12) Uani 0.9 1 d D U P K 2
F3A F 0.5778(11) 0.6176(10) 0.4887(12) 0.218(11) Uani 0.9 1 d D U P K 2
C1A C 0.5975(10) 0.5655(10) 0.4769(9) 0.199(15) Uani 0.9 1 d D U P K 2
O3A O 0.6030(10) 0.5940(10) 0.3431(12) 0.183(10) Uani 0.9 1 d D U P K 2
O1A O 0.5781(13) 0.4971(9) 0.3417(16) 0.232(15) Uani 0.9 1 d D U P K 2
S1A S 0.5684(5) 0.5578(5) 0.3593(6) 0.161(4) Uani 0.9 1 d D U P K 2
C2A C 0.4553(9) 0.9514(11) 1.0889(15) 0.21(2) Uani 0.6 1 d D U P L 1
F5A F 0.4144(9) 0.9152(12) 1.0475(15) 0.147(10) Uani 0.6 1 d D U P L 1
F6A F 0.4474(11) 0.9826(12) 1.1440(17) 0.186(13) Uani 0.6 1 d D U P L 1
O6A O 0.5688(9) 0.9506(12) 1.1846(17) 0.197(18) Uani 0.6 1 d D U P L 1
O5A O 0.5403(11) 0.8818(12) 1.0805(15) 0.132(10) Uani 0.6 1 d D U P L 1
O4A O 0.5220(15) 0.8660(14) 1.1987(18) 0.207(18) Uani 0.6 1 d D U P L 1
S2A S 0.5263(8) 0.9045(9) 1.1444(12) 0.237(10) Uani 0.6 1 d D U P L 1
F4A F 0.4714(13) 0.9865(13) 1.0383(18) 0.330(3) Uani 0.6 1 d D U P L 1

loop_
    _atom_site_aniso_label
    _atom_site_aniso_U_11
    _atom_site_aniso_U_22
    _atom_site_aniso_U_33
    _atom_site_aniso_U_23
    _atom_site_aniso_U_13
    _atom_site_aniso_U_12
Yb1 0.0422(5) 0.0370(5) 0.0639(6) 0.0090(4) 0.0277(4) -0.0028(4)
Fe1 0.0404(10) 0.0470(11) 0.0455(11) -0.0035(9) 0.0268(9) -0.0008(9)
O2 0.054(6) 0.051(6) 0.076(7) 0.014(5) 0.031(6) 0.001(5)
N3 0.041(7) 0.039(6) 0.074(9) 0.002(6) 0.034(6) 0.004(5)
N1 0.039(6) 0.076(9) 0.056(8) 0.004(7) 0.027(6) 0.010(6)
N5 0.052(7) 0.057(8) 0.056(8) -0.005(6) 0.033(6) -0.006(6)
N2 0.084(10) 0.053(8) 0.089(10) -0.006(7) 0.065(9) 0.000(7)
N6 0.057(8) 0.059(8) 0.073(9) -0.008(7) 0.048(7) -0.015(7)
O1 0.090(7) 0.066(6) 0.107(8) 0.012(6) 0.041(6) -0.013(6)
C2 0.048(8) 0.051(9) 0.070(10) -0.013(7) 0.037(8) -0.011(7)
N7 0.133(15) 0.037(7) 0.091(11) 0.003(7) 0.079(11) -0.007(8)
N4 0.045(6) 0.069(8) 0.044(6) -0.004(6) 0.021(5) 0.014(6)
C7 0.050(8) 0.058(9) 0.060(9) 0.005(7) 0.044(8) 0.012(7)
C32 0.039(8) 0.062(10) 0.060(10) 0.005(8) 0.014(7) 0.008(7)
C18 0.049(9) 0.063(10) 0.058(9) 0.003(7) 0.028(8) 0.020(8)
C3 0.066(10) 0.048(8) 0.066(10) -0.004(7) 0.040(9) -0.001(7)
C23 0.038(7) 0.073(10) 0.036(7) 0.000(6) 0.018(6) 0.001(7)
C1 0.034(7) 0.053(9) 0.069(11) -0.012(7) 0.033(7) 0.010(6)
C5 0.061(11) 0.047(9) 0.106(14) 0.002(9) 0.057(11) -0.001(8)
C22 0.051(8) 0.087(12) 0.039(7) -0.004(8) 0.025(6) 0.001(9)
C4 0.045(8) 0.051(8) 0.066(10) 0.003(7) 0.023(8) 0.000(7)
C19 0.050(9) 0.077(10) 0.047(8) -0.013(7) 0.038(7) 0.000(8)
C24 0.057(10) 0.071(11) 0.065(11) -0.013(8) 0.033(9) -0.024(9)
C17 0.068(12) 0.070(12) 0.082(13) 0.008(10) 0.035(10) 0.020(9)
C15 0.053(9) 0.077(11) 0.065(10) -0.007(9) 0.034(8) 0.011(8)
C20 0.053(10) 0.087(13) 0.075(12) -0.007(10) 0.035(9) 0.016(9)
C6 0.062(11) 0.060(10) 0.091(13) 0.009(9) 0.053(11) 0.011(8)
C36 0.066(11) 0.079(12) 0.074(12) -0.004(9) 0.026(10) -0.020(9)
C27 0.073(11) 0.055(10) 0.075(11) -0.004(8) 0.041(10) -0.025(9)
C11 0.059(9) 0.061(10) 0.059(10) 0.005(8) 0.038(8) 0.018(8)
C8 0.089(13) 0.074(12) 0.098(15) 0.024(11) 0.081(13) 0.022(10)
C26 0.067(11) 0.058(10) 0.077(12) -0.005(8) 0.035(10) -0.014(8)
C21 0.050(9) 0.108(15) 0.046(9) -0.015(9) 0.028(8) -0.008(10)
C29 0.122(18) 0.062(12) 0.125(18) -0.007(12) 0.086(16) -0.014(12)
C14 0.062(11) 0.078(11) 0.072(12) -0.011(9) 0.037(10) 0.011(9)
C25 0.067(12) 0.079(12) 0.095(14) -0.018(10) 0.054(11) -0.022(10)
C16 0.074(13) 0.065(11) 0.117(17) -0.015(11) 0.048(12) 0.002(10)
C35 0.088(15) 0.13(2) 0.105(17) 0.001(15) 0.076(14) -0.021(14)
N1S 0.14(2) 0.091(14) 0.18(2) 0.011(14) 0.103(19) 0.009(14)
C2S 0.19(4) 0.14(3) 0.12(2) -0.010(19) 0.08(2) -0.05(3)
C1S 0.097(17) 0.087(15) 0.12(2) -0.011(13) 0.070(16) -0.013(13)
C10 0.068(12) 0.093(13) 0.080(13) 0.009(10) 0.056(11) 0.020(10)
C9 0.084(14) 0.091(14) 0.078(13) 0.009(11) 0.056(12) 0.016(11)
C13 0.060(11) 0.16(2) 0.042(9) -0.052(11) 0.008(8) 0.021(12)
C31 0.079(13) 0.048(10) 0.104(15) -0.001(9) 0.034(12) -0.012(9)
N8 0.120(10) 0.125(11) 0.134(11) -0.022(8) 0.063(8) 0.005(8)
C33 0.092(10) 0.096(10) 0.123(11) -0.008(8) 0.053(8) -0.014(8)
C30 0.082(13) 0.067(11) 0.090(14) 0.021(10) 0.041(11) -0.008(10)
C12 0.054(11) 0.110(15) 0.071(12) -0.015(11) 0.028(10) 0.024(10)
C28 0.114(17) 0.069(12) 0.074(12) 0.001(10) 0.046(12) 0.020(11)
C34 0.134(13) 0.132(13) 0.154(13) -0.013(9) 0.060(10) -0.007(9)
F1A 0.224(14) 0.231(14) 0.224(14) 0.003(9) 0.085(10) 0.002(9)
O2A 0.172(14) 0.194(14) 0.214(14) -0.013(9) 0.062(10) 0.024(9)
F2A 0.239(15) 0.221(15) 0.239(15) -0.009(9) 0.078(10) -0.003(10)
F3A 0.220(12) 0.216(12) 0.218(12) -0.002(5) 0.084(6) 0.005(5)
C1A 0.198(17) 0.196(17) 0.202(17) 0.001(10) 0.075(10) -0.009(10)
O3A 0.173(13) 0.181(13) 0.201(13) 0.025(9) 0.078(9) -0.048(9)
O1A 0.237(17) 0.218(17) 0.243(17) -0.014(10) 0.091(11) 0.011(10)
S1A 0.151(7) 0.161(7) 0.182(7) -0.023(6) 0.074(6) -0.053(6)
C2A 0.21(2) 0.21(3) 0.21(2) -0.004(10) 0.075(12) 0.004(10)
F5A 0.134(12) 0.138(12) 0.165(13) -0.006(9) 0.049(9) -0.004(9)
F6A 0.184(16) 0.192(16) 0.187(16) -0.002(10) 0.074(10) 0.003(10)
O6A 0.19(2) 0.19(2) 0.20(2) -0.009(10) 0.066(11) -0.011(10)
O5A 0.129(13) 0.133(13) 0.132(13) -0.022(9) 0.048(9) 0.014(9)
O4A 0.202(19) 0.22(2) 0.204(19) 0.013(10) 0.078(11) -0.013(10)
S2A 0.233(11) 0.233(11) 0.241(11) -0.003(5) 0.085(6) -0.003(5)
F4A 0.330(3) 0.330(3) 0.330(3) 0.00000(10) 0.1245(10) 0.00000(10)


#----------------------------------------------------------------------------#
#                   MOLECULAR GEOMETRY                                       #
#----------------------------------------------------------------------------#

_geom_special_details
;
 All esds (except the esd in the dihedral angle between two l.s. planes)
 are estimated using the full covariance matrix.  The cell esds are taken
 into account individually in the estimation of esds in distances, angles
 and torsion angles; correlations between esds in cell parameters are only
 used when they are defined by crystal symmetry.  An approximate (isotropic)
 treatment of cell esds is used for estimating esds involving l.s. planes.
;
loop_
    _geom_bond_atom_site_label_1
    _geom_bond_atom_site_label_2
    _geom_bond_distance
    _geom_bond_site_symmetry_2
    _geom_bond_publ_flag
Yb1 O1 2.141(13) . ?
Yb1 O1 2.141(13) 7_566 ?
Yb1 O2 2.217(10) 7_566 ?
Yb1 O2 2.217(10) . ?
Yb1 N1 2.334(14) . ?
Yb1 N1 2.334(14) 7_566 ?
Fe1 C1 1.885(18) . ?
Fe1 C2 1.894(16) . ?
Fe1 N3 1.952(11) . ?
Fe1 N5 1.986(13) . ?
Fe1 N6 1.989(12) . ?
Fe1 N4 1.999(12) . ?
O2 C32 1.316(18) . ?
N3 C3 1.30(2) . ?
N3 C7 1.369(18) . ?
N1 C1 1.14(2) . ?
N5 C15 1.34(2) . ?
N5 C19 1.367(18) . ?
N2 C2 1.147(19) . ?
N6 C23 1.307(19) . ?
N6 C26 1.34(2) . ?
O1 C27 1.332(19) . ?
N7 C30 1.29(2) . ?
N7 C29 1.33(3) . ?
N4 C14 1.35(2) . ?
N4 C11 1.36(2) . ?
C7 C6 1.39(2) . ?
C7 C11 1.43(2) . ?
C32 C33 1.35(3) . ?
C32 C36 1.38(2) . ?
C18 C17 1.36(2) . ?
C18 C19 1.40(2) . ?
C18 C20 1.45(2) . ?
C3 C4 1.39(2) . ?
C23 C22 1.41(2) . ?
C23 C19 1.43(2) . ?
C5 C6 1.37(3) . ?
C5 C4 1.40(2) . ?
C22 C24 1.38(2) . ?
C22 C21 1.47(2) . ?
C24 C25 1.32(2) . ?
C17 C16 1.36(3) . ?
C15 C16 1.38(2) . ?
C20 C21 1.31(3) . ?
C6 C8 1.48(2) . ?
C36 C35 1.34(3) . ?
C27 C31 1.33(3) . ?
C27 C28 1.39(3) . ?
C11 C10 1.41(2) . ?
C8 C9 1.36(3) . ?
C26 C25 1.45(2) . ?
C29 C28 1.42(3) . ?
C14 C13 1.36(3) . ?
C35 N8 1.32(3) . ?
N1S C1S 1.11(3) . ?
C2S C1S 1.38(4) . ?
C10 C12 1.38(3) . ?
C10 C9 1.40(3) . ?
C13 C12 1.37(3) . ?
C31 C30 1.33(2) . ?
N8 C34 1.34(3) . ?
C33 C34 1.40(4) . ?
F1A C1A 1.302(17) . ?
O2A S1A 1.382(14) . ?
F2A C1A 1.166(16) . ?
F3A C1A 1.277(17) . ?
C1A S1A 1.904(15) . ?
O3A S1A 1.253(13) . ?
O1A S1A 1.398(14) . ?
C2A F5A 1.255(16) . ?
C2A F6A 1.246(17) . ?
C2A F4A 1.331(18) . ?
C2A S2A 1.911(15) . ?
O6A S2A 1.416(17) . ?
O5A S2A 1.371(16) . ?
O4A S2A 1.296(15) . ?

loop_
    _geom_angle_atom_site_label_1
    _geom_angle_atom_site_label_2
    _geom_angle_atom_site_label_3
    _geom_angle
    _geom_angle_site_symmetry_1
    _geom_angle_site_symmetry_3
    _geom_angle_publ_flag
O1 Yb1 O1 180 . 7_566 ?
O1 Yb1 O2 90.7(4) . 7_566 ?
O1 Yb1 O2 89.3(4) 7_566 7_566 ?
O1 Yb1 O2 89.2(4) . . ?
O1 Yb1 O2 90.7(4) 7_566 . ?
O2 Yb1 O2 180.00(14) 7_566 . ?
O1 Yb1 N1 90.5(5) . . ?
O1 Yb1 N1 89.5(5) 7_566 . ?
O2 Yb1 N1 86.5(4) 7_566 . ?
O2 Yb1 N1 93.5(4) . . ?
O1 Yb1 N1 89.5(5) . 7_566 ?
O1 Yb1 N1 90.5(5) 7_566 7_566 ?
O2 Yb1 N1 93.5(4) 7_566 7_566 ?
O2 Yb1 N1 86.5(4) . 7_566 ?
N1 Yb1 N1 180.0(7) . 7_566 ?
C1 Fe1 C2 88.3(6) . . ?
C1 Fe1 N3 94.1(6) . . ?
C2 Fe1 N3 94.8(5) . . ?
C1 Fe1 N5 91.3(5) . . ?
C2 Fe1 N5 174.3(5) . . ?
N3 Fe1 N5 90.9(5) . . ?
C1 Fe1 N6 91.6(6) . . ?
C2 Fe1 N6 93.5(6) . . ?
N3 Fe1 N6 170.0(5) . . ?
N5 Fe1 N6 80.8(5) . . ?
C1 Fe1 N4 175.9(5) . . ?
C2 Fe1 N4 89.8(6) . . ?
N3 Fe1 N4 82.4(5) . . ?
N5 Fe1 N4 91.0(5) . . ?
N6 Fe1 N4 92.1(5) . . ?
C32 O2 Yb1 141.1(10) . . ?
C3 N3 C7 115.5(13) . . ?
C3 N3 Fe1 130.1(11) . . ?
C7 N3 Fe1 114.0(10) . . ?
C1 N1 Yb1 161.0(12) . . ?
C15 N5 C19 116.6(13) . . ?
C15 N5 Fe1 129.6(10) . . ?
C19 N5 Fe1 113.7(10) . . ?
C23 N6 C26 117.4(14) . . ?
C23 N6 Fe1 114.8(10) . . ?
C26 N6 Fe1 127.6(12) . . ?
C27 O1 Yb1 151.3(13) . . ?
N2 C2 Fe1 179.4(14) . . ?
C30 N7 C29 121.1(16) . . ?
C14 N4 C11 117.3(14) . . ?
C14 N4 Fe1 131.0(12) . . ?
C11 N4 Fe1 111.7(10) . . ?
N3 C7 C6 123.8(16) . . ?
N3 C7 C11 114.4(13) . . ?
C6 C7 C11 121.7(14) . . ?
O2 C32 C33 120.8(16) . . ?
O2 C32 C36 120.1(16) . . ?
C33 C32 C36 118.9(18) . . ?
C17 C18 C19 117.2(15) . . ?
C17 C18 C20 126.1(15) . . ?
C19 C18 C20 116.6(16) . . ?
N3 C3 C4 126.7(15) . . ?
N6 C23 C22 124.4(15) . . ?
N6 C23 C19 116.4(12) . . ?
C22 C23 C19 119.1(14) . . ?
N1 C1 Fe1 177.3(12) . . ?
C6 C5 C4 121.3(15) . . ?
C24 C22 C23 118.9(15) . . ?
C24 C22 C21 123.6(15) . . ?
C23 C22 C21 117.5(15) . . ?
C3 C4 C5 115.5(16) . . ?
N5 C19 C18 123.7(15) . . ?
N5 C19 C23 114.1(13) . . ?
C18 C19 C23 122.1(13) . . ?
C25 C24 C22 117.5(16) . . ?
C18 C17 C16 119.9(16) . . ?
N5 C15 C16 121.9(16) . . ?
C21 C20 C18 122.8(17) . . ?
C5 C6 C7 117.2(16) . . ?
C5 C6 C8 126.2(16) . . ?
C7 C6 C8 116.6(18) . . ?
C35 C36 C32 117.7(18) . . ?
C31 C27 O1 122.3(17) . . ?
C31 C27 C28 119.2(16) . . ?
O1 C27 C28 118.2(18) . . ?
N4 C11 C10 123.5(16) . . ?
N4 C11 C7 116.7(13) . . ?
C10 C11 C7 119.8(15) . . ?
C9 C8 C6 120.5(17) . . ?
N6 C26 C25 119.7(17) . . ?
C20 C21 C22 121.6(16) . . ?
N7 C29 C28 118.1(19) . . ?
N4 C14 C13 122.0(18) . . ?
C24 C25 C26 121.9(17) . . ?
C17 C16 C15 120.8(18) . . ?
N8 C35 C36 124(2) . . ?
N1S C1S C2S 172(3) . . ?
C12 C10 C9 124.5(18) . . ?
C12 C10 C11 116.4(18) . . ?
C9 C10 C11 119.0(19) . . ?
C8 C9 C10 122.3(18) . . ?
C14 C13 C12 120.9(18) . . ?
C30 C31 C27 119.4(19) . . ?
C35 N8 C34 120(2) . . ?
C32 C33 C34 121(2) . . ?
N7 C30 C31 124(2) . . ?
C13 C12 C10 119.8(18) . . ?
C27 C28 C29 118.2(19) . . ?
N8 C34 C33 118(3) . . ?
F2A C1A F3A 121.4(19) . . ?
F2A C1A F1A 114.2(18) . . ?
F3A C1A F1A 112.0(17) . . ?
F2A C1A S1A 95.1(12) . . ?
F3A C1A S1A 104.1(12) . . ?
F1A C1A S1A 106.9(14) . . ?
O3A S1A O2A 118.3(15) . . ?
O3A S1A O1A 111.5(14) . . ?
O2A S1A O1A 110.5(13) . . ?
O3A S1A C1A 100.4(10) . . ?
O2A S1A C1A 107.9(11) . . ?
O1A S1A C1A 107.1(12) . . ?
F5A C2A F6A 118.1(17) . . ?
F5A C2A F4A 110.1(17) . . ?
F6A C2A F4A 111.2(18) . . ?
F5A C2A S2A 108.0(14) . . ?
F6A C2A S2A 105.6(13) . . ?
F4A C2A S2A 102.4(11) . . ?
O4A S2A O5A 117.9(16) . . ?
O4A S2A O6A 109.9(16) . . ?
O5A S2A O6A 107.7(15) . . ?
O4A S2A C2A 114.4(15) . . ?
O5A S2A C2A 103.3(11) . . ?
O6A S2A C2A 102.2(10) . . ?

_iucr_refine_instructions_details
;
TITL MLKS253_12_0m_a.res in C2/c
    shelx.res
    created by SHELXL-2018/3 at 20:25:36 on 10-Mar-2021
CELL  0.71073  24.0591  21.8075  17.4040   90.000  112.174   90.000
ZERR     4.00   0.0018   0.0016   0.0013    0.000    0.002    0.000
LATT   7
SYMM  - X,   Y, 1/2 - Z
SFAC  C    FE   N    S    YB   O    F    H
UNIT  316 8 72 12 4 52 36 232
MERG   2
DFIX  1.8 S2A C2A
DFIX 1.3 c2a f4a
DFIX 1.3 c2a f5a
DFIX 1.3 c2a f6a
DFIX 1.4 s2a o4a
DFIX 1.4 s2a o5a
DFIX 1.4 s2a o6a
DFIX 2.1 f4a f5a
DFIX 2.1 f4a f6a
DFIX 2.1 f5a f6a
DFIX 2.2 o4a o5a
DFIX 2.2 o4a o6a
DFIX 2.2 o5a o6a
DFIX 2.8 o6a f6a
DFIX 2.8 o6a f4a
DFIX 2.7 o5a f4a
DFIX 2.7 s2a f4a
DFIX 2.6 s2a f5a
DFIX 2.6 s2a f6a
DFIX 2.7 c2a o4a
DFIX 2.7 c2a o5a
DFIX 2.7 c2a o6a
DFIX  1.7 S1A C1A
DFIX 1.3 c1a f1a
DFIX 1.3 c1a f2a
DFIX 1.3 c1a f3a
DFIX 1.4 s1a o1a
DFIX 1.4 s1a o2a
DFIX 1.4 s1a o3a
DFIX 2.1 f1a f2a
DFIX 2.1 f1a f3a
DFIX 2.1 f2a f3a
DFIX 2.2 o1a o2a
DFIX 2.2 o1a o3a
DFIX 2.2 o2a o3a
DFIX 2.8 o3a f3a
DFIX 2.8 o3a f2a
DFIX 2.6 s1a f1a
DFIX 2.6 s1a f2a
DFIX 2.6 s1a f3a
DFIX 2.7 c1a o1a
DFIX 2.7 c1a o2a
DFIX 2.7 c1a o3a
SIMU c1a f1a
SIMU C1a s1a
SIMU o4a s2a
SIMU c2a f5a
SIMU c2a f4a
SIMU o5a f4a
ISOR 0.01 0.01 o1a o2a o3a s1a
ISOR 0.01 0.01 f1a f2a f5a
ISOR 0.01 0.01 o4a o5a o6a
ISOR 0.01 0.01 f6a
ISOR 0.01 0.01 o1 n8 c34 c33
ISOR 0.01 0.01 c1a c2a
ISOR 0.005 0.005 f3a s2a
ISOR 0.0001 0.0001 f4a
FMAP   2
PLAN   20
ACTA
BOND
LIST   4
L.S.  30
TEMP    23.00
WGHT    0.142500  389.090393
FVAR       0.10219
YB1   5    0.250000    0.750000    0.500000    10.50000    0.04221    0.03702 =
         0.06395    0.00904    0.02769   -0.00281
FE1   2    0.345684    0.753810    0.827166    11.00000    0.04044    0.04701 =
         0.04551   -0.00347    0.02681   -0.00080
O2    6    0.330034    0.746895    0.466207    11.00000    0.05358    0.05057 =
         0.07631    0.01415    0.03105    0.00052
N3    3    0.271143    0.713950    0.819623    11.00000    0.04116    0.03894 =
         0.07401    0.00169    0.03351    0.00354
N1    3    0.306730    0.764169    0.640940    11.00000    0.03945    0.07622 =
         0.05645    0.00380    0.02665    0.00987
N5    3    0.383924    0.672917    0.828216    11.00000    0.05154    0.05669 =
         0.05642   -0.00453    0.03303   -0.00584
N2    3    0.298959    0.883478    0.826099    11.00000    0.08372    0.05256 =
         0.08856   -0.00608    0.06461    0.00018
N6    3    0.428593    0.781829    0.846658    11.00000    0.05727    0.05857 =
         0.07335   -0.00833    0.04788   -0.01514
O1    6    0.245463    0.847123    0.480772    11.00000    0.08987    0.06616 =
         0.10746    0.01213    0.04079   -0.01319
C2    1    0.316539    0.834507    0.826931    11.00000    0.04755    0.05093 =
         0.07001   -0.01252    0.03695   -0.01107
N7    3    0.281629    1.001958    0.381308    11.00000    0.13322    0.03666 =
         0.09053    0.00325    0.07893   -0.00722
AFIX  43
H7    8    0.287799    1.035284    0.359316    11.00000   -1.20000
AFIX   0
N4    3    0.363715    0.747758    0.948806    11.00000    0.04508    0.06854 =
         0.04377   -0.00408    0.02098    0.01382
C7    1    0.270671    0.695019    0.894386    11.00000    0.04970    0.05766 =
         0.05966    0.00500    0.04440    0.01213
C32   1    0.356041    0.711872    0.427940    11.00000    0.03855    0.06235 =
         0.05986    0.00521    0.01418    0.00839
C18   1    0.479482    0.625602    0.844658    11.00000    0.04923    0.06301 =
         0.05805    0.00291    0.02815    0.02012
C3    1    0.224635    0.697767    0.754584    11.00000    0.06572    0.04773 =
         0.06555   -0.00432    0.04014   -0.00085
AFIX  43
H3    8    0.224332    0.710066    0.703262    11.00000   -1.20000
AFIX   0
C23   1    0.466307    0.737970    0.849437    11.00000    0.03807    0.07268 =
         0.03551    0.00012    0.01766    0.00090
C1    1    0.322829    0.760160    0.711280    11.00000    0.03417    0.05343 =
         0.06929   -0.01246    0.03328    0.00978
C5    1    0.177478    0.645276    0.831889    11.00000    0.06143    0.04737 =
         0.10604    0.00243    0.05744   -0.00129
AFIX  43
H5    8    0.146486    0.621382    0.835339    11.00000   -1.20000
AFIX   0
C22   1    0.527199    0.747347    0.862329    11.00000    0.05141    0.08679 =
         0.03858   -0.00396    0.02461    0.00107
C4    1    0.175433    0.663996    0.754105    11.00000    0.04498    0.05118 =
         0.06558    0.00316    0.02341    0.00021
AFIX  43
H4    8    0.143355    0.654528    0.705300    11.00000   -1.20000
AFIX   0
C19   1    0.443699    0.676544    0.842399    11.00000    0.05025    0.07681 =
         0.04731   -0.01311    0.03849    0.00007
C24   1    0.548840    0.806403    0.870039    11.00000    0.05687    0.07060 =
         0.06533   -0.01290    0.03319   -0.02426
AFIX  43
H24   8    0.588635    0.814355    0.878117    11.00000   -1.20000
AFIX   0
C17   1    0.452463    0.569781    0.831480    11.00000    0.06772    0.06990 =
         0.08244    0.00758    0.03509    0.02039
AFIX  43
H17   8    0.474742    0.534592    0.833216    11.00000   -1.20000
AFIX   0
C15   1    0.359426    0.616980    0.814189    11.00000    0.05288    0.07681 =
         0.06466   -0.00654    0.03381    0.01136
AFIX  43
H15   8    0.318650    0.612777    0.803055    11.00000   -1.20000
AFIX   0
C20   1    0.541956    0.637520    0.860081    11.00000    0.05255    0.08707 =
         0.07456   -0.00657    0.03517    0.01592
AFIX  43
H20   8    0.567601    0.604345    0.866413    11.00000   -1.20000
AFIX   0
C6    1    0.224159    0.661405    0.903019    11.00000    0.06250    0.05973 =
         0.09065    0.00902    0.05339    0.01078
C36   1    0.407528    0.731359    0.418606    11.00000    0.06622    0.07891 =
         0.07409   -0.00352    0.02576   -0.02034
AFIX  43
H36   8    0.425489    0.768470    0.440798    11.00000   -1.20000
AFIX   0
C27   1    0.255569    0.897140    0.444023    11.00000    0.07313    0.05475 =
         0.07547   -0.00398    0.04052   -0.02495
C11   1    0.321282    0.714525    0.964561    11.00000    0.05857    0.06094 =
         0.05875    0.00537    0.03789    0.01783
C8    1    0.230180    0.646533    0.988903    11.00000    0.08948    0.07372 =
         0.09843    0.02412    0.08130    0.02212
AFIX  43
H8    8    0.200974    0.622915    0.997783    11.00000   -1.20000
AFIX   0
C26   1    0.448236    0.839676    0.850589    11.00000    0.06691    0.05822 =
         0.07698   -0.00534    0.03519   -0.01411
AFIX  43
H26   8    0.421860    0.872258    0.843791    11.00000   -1.20000
AFIX   0
C21   1    0.563874    0.692846    0.865492    11.00000    0.05046    0.10755 =
         0.04568   -0.01520    0.02802   -0.00807
AFIX  43
H21   8    0.603688    0.697866    0.871496    11.00000   -1.20000
AFIX   0
C29   1    0.324303    0.959629    0.406239    11.00000    0.12218    0.06243 =
         0.12455   -0.00716    0.08566   -0.01405
AFIX  43
H29   8    0.361401    0.966220    0.402533    11.00000   -1.20000
AFIX   0
C14   1    0.410036    0.769559    1.014591    11.00000    0.06224    0.07845 =
         0.07235   -0.01112    0.03738    0.01131
AFIX  43
H14   8    0.439343    0.792840    1.005450    11.00000   -1.20000
AFIX   0
C25   1    0.510978    0.851283    0.865531    11.00000    0.06740    0.07867 =
         0.09532   -0.01784    0.05370   -0.02155
AFIX  43
H25   8    0.524815    0.891514    0.872100    11.00000   -1.20000
AFIX   0
C16   1    0.392826    0.565434    0.815755    11.00000    0.07425    0.06498 =
         0.11663   -0.01547    0.04806    0.00229
AFIX  43
H16   8    0.374369    0.527184    0.805938    11.00000   -1.20000
AFIX   0
C35   1    0.430886    0.694959    0.376392    11.00000    0.08833    0.13466 =
         0.10537    0.00120    0.07557   -0.02123
AFIX  43
H35   8    0.467297    0.706393    0.373538    11.00000   -1.20000
AFIX   0
PART    1
N1S   3    0.734046    0.502677    0.670198    11.00000    0.13934    0.09139 =
         0.18171    0.01095    0.10267    0.00850
C2S   1    0.827457    0.453609    0.670168    11.00000    0.19161    0.13884 =
         0.11583   -0.00959    0.07654   -0.05348
AFIX 133
H2S1  8    0.859371    0.464842    0.721103    11.00000   -1.50000
H2S2  8    0.837433    0.466214    0.624089    11.00000   -1.50000
H2S3  8    0.822007    0.409951    0.668515    11.00000   -1.50000
AFIX   0
C1S   1    0.774966    0.482158    0.665555    11.00000    0.09683    0.08675 =
         0.12190   -0.01121    0.06958   -0.01287
PART    2
C10   1    0.324272    0.701058    1.045216    11.00000    0.06829    0.09334 =
         0.08024    0.00891    0.05605    0.01982
C9    1    0.278070    0.667160    1.054769    11.00000    0.08425    0.09052 =
         0.07830    0.00905    0.05551    0.01632
AFIX  43
H9    8    0.280138    0.658388    1.108074    11.00000   -1.20000
AFIX   0
C13   1    0.415246    0.758581    1.093853    11.00000    0.06010    0.15770 =
         0.04173   -0.05188    0.00776    0.02116
AFIX  43
H13   8    0.448225    0.773797    1.137697    11.00000   -1.20000
AFIX   0
C31   1    0.216352    0.943143    0.419654    11.00000    0.07891    0.04807 =
         0.10438   -0.00068    0.03435   -0.01185
AFIX  43
H31   8    0.179010    0.939776    0.423677    11.00000   -1.20000
AFIX   0
N8    3    0.405407    0.643833    0.338570    11.00000    0.12013    0.12512 =
         0.13380   -0.02231    0.06339    0.00528
AFIX  43
H8A   8    0.421548    0.623268    0.310239    11.00000   -1.20000
AFIX   0
C33   1    0.330097    0.659021    0.391167    11.00000    0.09199    0.09553 =
         0.12318   -0.00782    0.05314   -0.01426
AFIX  43
H33   8    0.295250    0.645628    0.397147    11.00000   -1.20000
AFIX   0
C30   1    0.231140    0.994013    0.389465    11.00000    0.08155    0.06703 =
         0.08986    0.02056    0.04132   -0.00814
AFIX  43
H30   8    0.203268    1.025732    0.373293    11.00000   -1.20000
AFIX   0
C12   1    0.372473    0.725324    1.110072    11.00000    0.05365    0.11023 =
         0.07149   -0.01464    0.02799    0.02418
AFIX  43
H12   8    0.375911    0.719132    1.164552    11.00000   -1.20000
AFIX   0
C28   1    0.311677    0.903788    0.438848    11.00000    0.11418    0.06888 =
         0.07434    0.00150    0.04649    0.02031
AFIX  43
H28   8    0.340084    0.872608    0.456219    11.00000   -1.20000
AFIX   0
C34   1    0.354512    0.624121    0.344401    11.00000    0.13415    0.13249 =
         0.15408   -0.01250    0.05964   -0.00741
AFIX  43
H34   8    0.335972    0.588285    0.318121    11.00000   -1.20000
AFIX   0
F1A   7    0.655922    0.564489    0.503553    10.90000    0.22391    0.23118 =
         0.22402    0.00273    0.08492    0.00152
O2A   6    0.507765    0.571027    0.328236    10.90000    0.17242    0.19391 =
         0.21379   -0.01324    0.06192    0.02398
F2A   7    0.576176    0.519909    0.487393    10.90000    0.23926    0.22139 =
         0.23900   -0.00862    0.07830   -0.00275
F3A   7    0.577848    0.617621    0.488673    10.90000    0.21985    0.21552 =
         0.21825   -0.00204    0.08366    0.00492
C1A   1    0.597549    0.565545    0.476893    10.90000    0.19845    0.19610 =
         0.20188    0.00060    0.07453   -0.00929
O3A   6    0.603028    0.593981    0.343070    10.90000    0.17341    0.18083 =
         0.20102    0.02505    0.07803   -0.04838
O1A   6    0.578111    0.497126    0.341733    10.90000    0.23660    0.21794 =
         0.24279   -0.01359    0.09116    0.01090
S1A   4    0.568444    0.557829    0.359280    10.90000    0.15136    0.16051 =
         0.18203   -0.02307    0.07448   -0.05310
PART    1
C2A   1    0.455289    0.951437    1.088887    10.60000    0.20712    0.20557 =
         0.21130   -0.00387    0.07520    0.00389
F5A   7    0.414438    0.915170    1.047545    10.60000    0.13358    0.13778 =
         0.16457   -0.00573    0.04913   -0.00390
F6A   7    0.447440    0.982588    1.143961    10.60000    0.18421    0.19241 =
         0.18677   -0.00190    0.07446    0.00292
O6A   6    0.568820    0.950582    1.184582    10.60000    0.19305    0.19224 =
         0.19896   -0.00902    0.06598   -0.01079
O5A   6    0.540344    0.881755    1.080530    10.60000    0.12859    0.13311 =
         0.13213   -0.02170    0.04773    0.01379
O4A   6    0.522021    0.866006    1.198663    10.60000    0.20174    0.21668 =
         0.20384    0.01266    0.07794   -0.01286
S2A   4    0.526298    0.904502    1.144392    10.60000    0.23267    0.23338 =
         0.24122   -0.00262    0.08484   -0.00277
F4A   7    0.471422    0.986544    1.038266    10.60000    0.32992    0.32992 =
         0.32992    0.00000    0.12452    0.00000
HKLF    4


REM  MLKS253_12_0m_a.res in C2/c
REM wR2 = 0.3358, GooF = S = 1.038, Restrained GooF = 1.123 for all data
REM R1 = 0.1100 for 4725 Fo > 4sig(Fo) and 0.1600 for all 7469 data
REM 601 parameters refined using 193 restraints

END

WGHT      0.1389    383.2229

REM Highest difference peak  2.294,  deepest hole -1.808,  1-sigma level  0.206
Q1    1   0.5000  0.6466  0.2500  10.50000  0.05    2.29
Q2    1   0.5000  0.6038  0.2500  10.50000  0.05    2.28
Q3    1   0.5159  0.9542  1.0603  11.00000  0.05    1.78
Q4    1   0.2157  0.7524  0.4759  11.00000  0.05    1.66
Q5    1   0.4343  0.9408  1.1374  11.00000  0.05    1.32
Q6    1   0.3426  0.7759  0.7837  11.00000  0.05    1.22
Q7    1   0.2982  0.8254  0.4826  11.00000  0.05    1.22
Q8    1   0.5140  0.8955  1.2085  11.00000  0.05    1.20
Q9    1   0.5602  0.5697  0.2560  11.00000  0.05    1.17
Q10   1   0.5000  0.8904  1.2500  10.50000  0.05    1.10
Q11   1   0.3179  0.7713  0.7667  11.00000  0.05    1.07
Q12   1   0.3172  0.6920  0.4804  11.00000  0.05    1.06
Q13   1   0.3045  0.7490  0.7946  11.00000  0.05    0.98
Q14   1   0.3875  0.7406  0.8599  11.00000  0.05    0.91
Q15   1   0.4814  0.5452  0.4428  11.00000  0.05    0.83
Q16   1   0.4200  0.9266  0.9978  11.00000  0.05    0.82
Q17   1   0.5196  0.5648  0.4583  11.00000  0.05    0.78
Q18   1   0.6188  0.5341  0.4143  11.00000  0.05    0.77
Q19   1   0.4661  0.9094  1.1997  11.00000  0.05    0.76
Q20   1   0.5399  0.9004  1.0441  11.00000  0.05    0.71
;

# END of CIF
