# Supplementary material
Source: MDPI journal article supplement (https://www.mdpi.com/2312-7481/7/6/79)
Supplement: s1 [file s1 › 1_PrCN.cif]

#\#CIF_1.1

#  CIF produced by WinGX routine CIF_UPDATE
#  Created on 2021-03-09 at 11:53:43
#  Using CIFtbx version 3.0.4  1 Sep 2006

#  Dictionary name : cif_core.dic
#  Dictionary vers : 2.4.5
#  Request file    : c:\wingx\files\archive.reqdat
#  CIF files read  : mlks338_12_0m_a project

#------------------ SECTION 1. GLOBAL INFORMATION ---------------------------#

data_global

#------------------ AUDIT DETAILS -------------------------------------------#

_audit_creation_date            2021-03-09
_audit_creation_method          'WinGX routine CIF_UPDATE'
_audit_conform_dict_name        cif_core.dic
_audit_conform_dict_version     2.4.3
_audit_conform_dict_location    ftp://ftp.iucr.org/pub/cif_core.dic
_audit_update_record            ?

#------------------ AUTHOR DETAILS -------------------------------------------#

# Name and address of author for correspondence
 
_publ_contact_author_name       'Liberka, Michal'
_publ_contact_author_address
;
Gronostajowa 2, 30-387 Krakow, Poland
;
_publ_contact_author_email       'michal.liberka@doctoral.uj.edu.pl'
_publ_contact_author_fax         ' '
_publ_contact_author_phone       ' '


# Insert blank lines between references

_publ_section_references
;
Blessing, R. H. (1995) Acta Cryst., A51, 33-38.

Blessing, R. H. (1987) Cryst. Rev. 1, 3-58.

Blessing, R. H. (1989) J. Appl. Cryst. 22, 396-397.

Bruker (2012) APEX2 (Version 2012.10-0), SAINT (version 8.27B), SADABS
(version 2012/1), BrukerAXS Inc, Madison, Wisconsin, USA.

ABSCOR: Higashi, T. (1995). ABSCOR. Rigaku Corporation, Tokyo, Japan.

CAD-4 Software: Enraf-Nonius (1989). CAD-4 Software (or CAD-4 EXPRESS).
Enraf-Nonius, Delft, The Netherlands.

Cambridge Structural Database: Allen, F. R. (2002). Acta Cryst. B58, 380-388.

CAMERON: Watkin, D. J., Prout, C. K. & Pearce, L. J. (1996). CAMERON.
Chemical Crystallography Laboratory, Oxford, England.

CrysAlis CCD, CrysAlis RED and associated programs: Oxford Diffraction (2006).
Program name(s). Oxford Diffraction Ltd, Abingdon, England.

CRYSTALS: Betteridge, P. W., Carruthers, J. R., Cooper, R. I., Prout, K. &
Watkin, D. J. (2003). J. Appl. Cryst. 36, 1487.

COLLECT: Nonius (1998). COLLECT. Nonius BV, Delft, The Netherlands.

DENZO/SCALEPACK:  Otwinowski, Z. & Minor, W. (1997). Methods in Enzymology,
Vol. 276, Macromolecular Crystallography, Part A, edited by C. W. Carter Jr
& R. M. Sweet, pp. 307-326. New York: Academic Press.

DIAMOND: Brandenburg, K.(2006). DIAMOND. Crystal Impact GbR, Bonn, Germany.

DIF4 and REDU4: Stoe & Cie (1991). Program name(s). Stoe & Cie, Darmstadt,
Germany.

DIFABS: Walker, N. &  Stuart, D. (1983). Acta Cryst., A39, 158 - 166.

DIRAX: Duisenberg, A. J. M. (1992). J. Appl. Cryst. 25, 92-96.

DIRDIF-2008: Beurskens, P.T., Beurskens, G., de Gelder, R., Garci\'ia-Granda,
S., Gould, R.O. & Smits, J.M.M. (2008) The DIRDIF-2008 program
system, Crystallography Laboratory, Radboud University  Nijmegen,
The Netherlands.

EDMA: Palatinus, L., Prathapa, S. J. & van Smaalen, S. (2012) J. Appl. Cryst.
45, 575-580.

enCIFer: Allen, F. H., Johnson, O., Shields, G. P., Smith, B. R. & Towler,
M. (2004). J. Appl. Cryst. 37, 335-338.

EVALCCD: Duisenberg, A. J. M., Kroon-Batenburg, L. M. J. & Schreurs,
A. M. M. (2003). J. Appl. Cryst. 36, 220-229.

JANA2000: Petricek, V. & Dusek, M. (2000). JANA2000. Institute of Physics,
Czech Academy of Sciences, Prague, Czech Republic.

MERCURY: Macrae, C. F., Bruno, I. J., Chisholm, J. A., Edgington,
P. R., McCabe, P., Pidcock, E., Rodriguez-Monge, L., Taylor, R.,
van de Streek, J. & Wood, P. A. (2008). J. Appl. Cryst. 41, 466-470.

MOGUL: Bruno, I. J., Cole, J. C., Kessler, M., Luo, J., Motherwell,
W. D. S., Purkis, L. H., Smith, B. R., Taylor, R., Cooper, R. I., Harris,
S. E. & Orpen, A. G. (2004). J. Chem. Inf. Comput. Sci. 44, 2133-2144.

ORTEPII: Johnson, C. K. (1976). ORTEPII. Report ORNL-5138. Oak Ridge
National Laboratory, Tennessee, USA.

ORTEPIII:  Burnett, M. N. & Johnson, C. K. (1996). ORTEPIII.
Report ORNL-6895. Oak Ridge National Laboratory, Tennessee, USA.

ORTEP-3: Farrugia, L. J. (2012). J. Appl. Cryst. 45, 849-854.

PARST: Nardelli, M. (1995). J. Appl. Cryst. 28, 659.

PLATON: Spek, A. L. (2009). Acta. Cryst. D65, 148-155.

PROCESS: Rigaku (1996). PROCESS. Rigaku Corporation, Tokyo, Japan.

PROCESS-AUTO: Rigaku (1998). PROCESS-AUTO. Rigaku Corporation, Tokyo, Japan.

PublCIF: Westrip, S. P. (2010). J. Appl. Cryst. 43, 920-925.

SCHAKAL: Keller, E. (1999) University of Freiburg, Germany.

SHELX: Sheldrick, G. M. (2008). Acta Cryst. A64, 112-122.

SHELXD: Schneider, T. R. & Sheldrick, G. M. (2002) Acta Cryst. D58, 1772-1779.

SIR92: Altomare, A., Cascarano, G., Giacovazzo, C., Guagliardi, A., Burla,
M. C., Polidori, G. & Camalli, M. (1994). J. Appl. Cryst. 27, 435.

SIR97: Altomare, A., Burla, M. C., Camalli, M., Cascarano, G. L.,
Giacovazzo, C., Guagliardi, A., Moliterni, A. G. G., Polidori, G. &
Spagna, R. (1999). J. Appl. Cryst. 32, 115-119.

SIR2002: Burla, M. C., Camalli, M., Carrozzini, B., Cascarano, G. L.,
Giacovazzo, C., Polidori, G. & Spagna, R. (2003). J. Appl. Cryst. 36, 1103.

SIR2004: Burla, M. C., Caliandro, R., Camalli, M., Carrozzini, B.,
Cascarano, G. L., De Caro, L., Giacovazzo, C., Polidori, G. & Spagna, R.
(2005). J. Appl. Cryst. 38, 381-388.

SIR2008 & IL MILIONE: Burla, M. C., Caliandro, R., Camalli, M., Carrozzini, B.,
Cascarano, G. L., De Caro, L., Giacovazzo, C., Polidori, G., Siliqi, D.,
& Spagna, R. (2007). J. Appl. Cryst. 40, 609-613.

SIR2011: Burla, M. C., Caliandro, R., Camalli, M., Carrozzini, B.,
Cascarano, G. L., Giacovazzo, C., Mallamo, M., Mazzone, A., Polidori, G.
& Spagna, R. (2012). J. Appl. Cryst. 45, 357-361.

SUPERFLIP: Palatinus, L. & Chapuis, G. (2007) J. Appl. Cryst. 40, 786-790.

TEXSAN: Molecular Structure Corporation & Rigaku (2000). TEXSAN. MSC,
The Woodlands, Texas, USA, and Rigaku Corporation, Tokyo, Japan.

WinGX: Farrugia, L. J. (2012). J. Appl. Cryst. 45, 849-854.

X-AREA, X-RED, X-RED32, X-SHAPE:  Stoe & Cie (2002). Program name(s).
Stoe & Cie GmbH, Darmstadt, Germany.

XCAD4: Harms, K. & Wocadlo, S. (1995). XCAD4. University of Marburg, Germany.

XSCANS: Siemens (1994). XSCANS. Siemens Analytical X-ray Instruments Inc.,
Madison, Wisconsin, USA.

;

#------------------  SECTION 2. COMPOUND(S) DETAILS -------------------------#

data_shelx

_audit_creation_date                    2021-03-09T11:53:43-00:00
_audit_creation_method                  'WinGX routine CIF_UPDATE'
_audit_conform_dict_name                cif_core.dic
_audit_conform_dict_version             2.4.5
_audit_conform_dict_location            ftp://ftp.iucr.org/pub/cif_core.dic
_publ_requested_category                FM

#----------------------------------------------------------------------------#
#                   CHEMICAL INFORMATION                                     #
#----------------------------------------------------------------------------#

_chemical_formula_moiety                'C72 H52 Fe2 N16 O4 Yb, 3(C F3 O3 S), 2(C3 H5 N)'
_chemical_formula_sum                   'C81 H62 F9 Fe2 N18 O13 S3 Yb'
_chemical_formula_weight                2047.4

#----------------------------------------------------------------------------#
#                   UNIT CELL INFORMATION                                    #
#----------------------------------------------------------------------------#

_symmetry_cell_setting                  monoclinic
_symmetry_space_group_name_H-M          'C 2/c'
_symmetry_space_group_name_Hall         '-C 2yc'
_symmetry_Int_Tables_number             15
loop_
    _symmetry_equiv_pos_as_xyz
'x, y, z'
'-x, y, -z+1/2'
'x+1/2, y+1/2, z'
'-x+1/2, y+1/2, -z+1/2'
'-x, -y, -z'
'x, -y, z-1/2'
'-x+1/2, -y+1/2, -z'
'x+1/2, -y+1/2, z-1/2'

_cell_length_a                          24.413(3)
_cell_length_b                          21.988(2)
_cell_length_c                          17.264(2)
_cell_angle_alpha                       90
_cell_angle_beta                        112.169(3)
_cell_angle_gamma                       90
_cell_volume                            8582.2(17)
_cell_formula_units_Z                   4
_cell_measurement_temperature           100(2)
_cell_measurement_reflns_used           47555
_cell_measurement_theta_min             2.248
_cell_measurement_theta_max             25.027
_cell_measurement_wavelength            0.71073

#----------------------------------------------------------------------------#
#                   CRYSTAL INFORMATION                                      #
#----------------------------------------------------------------------------#

_exptl_crystal_description              needle	
_exptl_crystal_colour                   red
_exptl_crystal_size_max                 0.2
_exptl_crystal_size_mid                 0.08
_exptl_crystal_size_min                 0.07
_exptl_crystal_density_diffrn           1.585
_exptl_crystal_density_method           'not measured'
_exptl_crystal_F_000                    4116

#----------------------------------------------------------------------------#
#                   ABSORPTION CORRECTION                                    #
#----------------------------------------------------------------------------#

_exptl_absorpt_coefficient_mu           1.579
_exptl_absorpt_correction_type          'multi-scan' 
_exptl_absorpt_correction_T_min         0.5924
_exptl_absorpt_correction_T_max         0.7454
_exptl_absorpt_process_details          'TWINABS (Sheldrick, 2009)' 

#----------------------------------------------------------------------------#
#                   DATA COLLECTION                                          #
#----------------------------------------------------------------------------#

_diffrn_ambient_temperature             100(2)
_diffrn_radiation_wavelength            0.71073
_diffrn_radiation_type                  MoK\a
_diffrn_radiation_probe                 x-ray
_diffrn_radiation_monochromator         graphite
_diffrn_measurement_device_type   	'D8Quest Eco Photon50' 
_diffrn_measurement_method       	 \w 
_diffrn_standards_number                0
_diffrn_standards_interval_time         0
_diffrn_standards_interval_count        0
_diffrn_standards_decay_%               0
_diffrn_reflns_av_R_equivalents         0.0442
_diffrn_reflns_av_unetI/netI            0.033
_diffrn_reflns_number                   47555
_diffrn_reflns_limit_h_min              -29
_diffrn_reflns_limit_h_max              29
_diffrn_reflns_limit_k_min              -26
_diffrn_reflns_limit_k_max              26
_diffrn_reflns_limit_l_min              -20
_diffrn_reflns_limit_l_max              20
_diffrn_reflns_theta_min                2.248
_diffrn_reflns_theta_max                25.027
_diffrn_reflns_theta_full               25.027
_diffrn_measured_fraction_theta_full
                                        0.999
_diffrn_measured_fraction_theta_max
                                        0.999
_diffrn_reflns_Laue_measured_fraction_full
                                        0.999
_diffrn_reflns_Laue_measured_fraction_max
                                        0.999
_diffrn_reflns_point_group_measured_fraction_full
                                        0.999
_diffrn_reflns_point_group_measured_fraction_max
                                        0.999
_reflns_Friedel_coverage                0
_reflns_number_total                    7579
_reflns_number_gt                       6024
_reflns_threshold_expression            'I > 2\s(I)'

#----------------------------------------------------------------------------#
#                   COMPUTER PROGRAMS USED                                   #
#----------------------------------------------------------------------------#

_computing_structure_solution           'SHELXT 2018/2 (Sheldrick, 2018)'
_computing_structure_refinement         'SHELXL-2018/3 (Sheldrick, 2018)'
_computing_molecular_graphics           'Ortep for Windows (Farrugia, 2012)'
_computing_publication_material
                                   'WinGX publication routines (Farrugia, 2012)'

#----------------------------------------------------------------------------#
#                   STRUCTURE SOLUTION                                       #
#----------------------------------------------------------------------------#

_atom_sites_solution_hydrogens          geom

#----------------------------------------------------------------------------#
#                   REFINEMENT INFORMATION                                   #
#----------------------------------------------------------------------------#

_shelx_SHELXL_version_number            2018/3
_refine_ls_structure_factor_coef        Fsqd
_refine_ls_matrix_type                  full
_refine_ls_weighting_scheme             calc
_refine_ls_weighting_details
            'w=1/[\s^2^(Fo^2^)+(0.1275P)^2^+356.2026P] where P=(Fo^2^+2Fc^2^)/3'
_refine_ls_hydrogen_treatment           constr
_refine_ls_extinction_method            none
_refine_ls_number_reflns                7579
_refine_ls_number_parameters            610
_refine_ls_number_restraints            182
_refine_ls_number_constraints           0
_refine_ls_R_factor_all                 0.123
_refine_ls_R_factor_gt                  0.1043
_refine_ls_wR_factor_ref                0.2888
_refine_ls_wR_factor_gt                 0.2738
_refine_ls_goodness_of_fit_ref          1.099
_refine_ls_restrained_S_all             1.109
_refine_ls_shift/su_max                 0.008
_refine_ls_shift/su_mean                0
_refine_diff_density_max                3.75
_refine_diff_density_min                -1.907
_refine_diff_density_rms                0.23

# start Validation Reply Form 
_vrf_PLAT342_shelx           
;
RESPONSE: Low C-C bond precision can be caused by moderate structural
disorder involving trimethanesulfonate anions, which have been modeled
from residual electron densities in the crystal strucutre.
Alternatively, low C-C bond precision could be a result of the twinning
affecting in different degree spacially separated parts of the structure.  
;
# end Validation Reply Form

# start Validation Reply Form 
_vrf_PLAT430_shelx           
;
RESPONSE: Due to the high structural disorder involving trimethanesulfonate anions,
it was necessary to model these molecules from residual electron densities
in the crystal strucutre and allowing all of them to be partially populated,
resulting in slightly understated non-bonding donor-acceptor contacts. 
;
# end Validation Reply Form

#----------------------------------------------------------------------------#
#                   CONSTRAINTS AND RESTRAINTS                               #
#----------------------------------------------------------------------------#


#----------------------------------------------------------------------------#
#                   ATOMIC TYPES, COORDINATES AND THERMAL PARAMETERS         #
#----------------------------------------------------------------------------#

loop_
    _atom_type_symbol
    _atom_type_description
    _atom_type_scat_dispersion_real
    _atom_type_scat_dispersion_imag
    _atom_type_scat_source
C C 0.0033 0.0016 'International Tables Vol C Tables 4.2.6.8 and 6.1.1.4'
H H 0 0 'International Tables Vol C Tables 4.2.6.8 and 6.1.1.4'
F F 0.0171 0.0103 'International Tables Vol C Tables 4.2.6.8 and 6.1.1.4'
Fe Fe 0.3463 0.8444 'International Tables Vol C Tables 4.2.6.8 and 6.1.1.4'
N N 0.0061 0.0033 'International Tables Vol C Tables 4.2.6.8 and 6.1.1.4'
O O 0.0106 0.006 'International Tables Vol C Tables 4.2.6.8 and 6.1.1.4'
S S 0.1246 0.1234 'International Tables Vol C Tables 4.2.6.8 and 6.1.1.4'
Yb Yb -0.385 5.5486 'International Tables Vol C Tables 4.2.6.8 and 6.1.1.4'

loop_
    _atom_site_label
    _atom_site_type_symbol
    _atom_site_fract_x
    _atom_site_fract_y
    _atom_site_fract_z
    _atom_site_U_iso_or_equiv
    _atom_site_adp_type
    _atom_site_occupancy
    _atom_site_site_symmetry_order
    _atom_site_calc_flag
    _atom_site_refinement_flags_posn
    _atom_site_refinement_flags_adp
    _atom_site_refinement_flags_occupancy
    _atom_site_disorder_assembly
    _atom_site_disorder_group
Yb1 Yb 0.25 0.75 0 0.0277(3) Uani 1 2 d S . P . .
Fe1 Fe 0.34948(7) 0.75391(7) 0.32827(10) 0.0312(4) Uani 1 1 d . . . . .
N6 N 0.2742(4) 0.7152(4) 0.3198(6) 0.030(2) Uani 1 1 d . . . . .
N1 N 0.3094(4) 0.7664(4) 0.1388(6) 0.033(2) Uani 1 1 d . . . . .
N4 N 0.3855(4) 0.6723(4) 0.3256(6) 0.032(2) Uani 1 1 d . . . . .
N2 N 0.3048(5) 0.8827(5) 0.3369(7) 0.038(2) Uani 1 1 d . . . . .
O2 O 0.2454(5) 0.8454(5) -0.0268(7) 0.065(3) Uani 1 1 d . . . . .
N3 N 0.4304(4) 0.7819(4) 0.3470(6) 0.032(2) Uani 1 1 d . . . . .
C26 C 0.2266(5) 0.7015(5) 0.2527(8) 0.035(3) Uani 1 1 d . . . . .
H26 H 0.226288 0.712714 0.200509 0.042 Uiso 1 1 calc R U . . .
C25 C 0.1778(5) 0.6717(5) 0.2558(8) 0.037(3) Uani 1 1 d . . . . .
H25 H 0.145578 0.663156 0.206896 0.045 Uiso 1 1 calc R U . . .
N5 N 0.3680(5) 0.7434(4) 0.4506(6) 0.037(2) Uani 1 1 d . . . . .
C2 C 0.3208(5) 0.8342(5) 0.3329(7) 0.031(2) Uani 1 1 d . . . . .
C1 C 0.3257(5) 0.7624(5) 0.2108(8) 0.029(2) Uani 1 1 d . . . . .
C19 C 0.3245(5) 0.7135(5) 0.4663(8) 0.036(3) Uani 1 1 d . . . . .
C23 C 0.2739(5) 0.6978(5) 0.3952(7) 0.033(3) Uani 1 1 d . . . . .
C14 C 0.3612(5) 0.6177(5) 0.3096(8) 0.037(3) Uani 1 1 d . . . . .
H14 H 0.320892 0.614281 0.298159 0.045 Uiso 1 1 calc R U . . .
C24 C 0.1775(6) 0.6552(6) 0.3310(9) 0.046(3) Uani 1 1 d . . . . .
H24 H 0.14463 0.635423 0.333776 0.055 Uiso 1 1 calc R U . . .
N8 N 0.2873(7) 1.0035(5) -0.1113(8) 0.064(4) Uani 1 1 d . . . . .
H8A H 0.29507 1.038291 -0.127488 0.077 Uiso 1 1 calc R U . . .
C22 C 0.2264(6) 0.6676(6) 0.4055(9) 0.042(3) Uani 1 1 d . . . . .
C7 C 0.4687(5) 0.7356(5) 0.3517(7) 0.033(3) Uani 1 1 d . . . . .
C3 C 0.4528(6) 0.8387(6) 0.3574(8) 0.039(3) Uani 1 1 d . . . . .
H3 H 0.428357 0.871087 0.357633 0.047 Uiso 1 1 calc R U . . .
C15 C 0.4148(6) 0.7626(6) 0.5158(8) 0.044(3) Uani 1 1 d . . . . .
H15 H 0.444159 0.784895 0.506729 0.053 Uiso 1 1 calc R U . . .
C5 C 0.5494(5) 0.8046(6) 0.3735(7) 0.035(3) Uani 1 1 d . U . . .
H5 H 0.588824 0.812797 0.383265 0.042 Uiso 1 1 calc R U . . .
C6 C 0.5284(6) 0.7436(6) 0.3641(8) 0.041(3) Uani 1 1 d . . . . .
C18 C 0.3275(6) 0.6989(7) 0.5475(8) 0.047(3) Uani 1 1 d . . . . .
C11 C 0.4442(5) 0.6769(5) 0.3405(7) 0.031(2) Uani 1 1 d . . . . .
C12 C 0.4527(6) 0.5691(7) 0.3274(9) 0.049(3) Uani 1 1 d . . . . .
H12 H 0.474883 0.534271 0.329744 0.059 Uiso 1 1 calc R U . . .
C20 C 0.2784(7) 0.6678(7) 0.5561(9) 0.049(4) Uani 1 1 d . . . . .
H20 H 0.279584 0.658126 0.609184 0.059 Uiso 1 1 calc R U . . .
C10 C 0.4801(5) 0.6258(6) 0.3425(8) 0.040(3) Uani 1 1 d . . . . .
C21 C 0.2308(7) 0.6524(6) 0.4887(9) 0.049(4) Uani 1 1 d . . . . .
H21 H 0.199912 0.631504 0.495843 0.059 Uiso 1 1 calc R U . . .
N7 N 0.0984(7) 0.8602(7) 0.1632(10) 0.077(4) Uani 1 1 d . U . . .
H7 H 0.080232 0.882523 0.186838 0.092 Uiso 1 1 calc R U . . .
C4 C 0.5110(5) 0.8507(6) 0.3679(8) 0.039(3) Uani 1 1 d . . . . .
H4 H 0.523925 0.890796 0.371072 0.047 Uiso 1 1 calc R U . . .
C13 C 0.3929(6) 0.5644(6) 0.3089(10) 0.052(4) Uani 1 1 d . . . . .
H13 H 0.373894 0.526979 0.296344 0.062 Uiso 1 1 calc R U . . .
C32 C 0.2573(7) 0.8973(7) -0.0571(9) 0.052(3) Uani 1 1 d . U . . .
C9 C 0.5403(6) 0.6358(7) 0.3586(9) 0.051(4) Uani 1 1 d . . . . .
H9 H 0.564819 0.60226 0.364306 0.061 Uiso 1 1 calc R U . . .
C8 C 0.5643(5) 0.6924(6) 0.3660(8) 0.042(3) Uani 1 1 d . U . . .
H8 H 0.603579 0.697468 0.372295 0.05 Uiso 1 1 calc R U . . .
N1S N 0.2663(8) 0.5101(7) 0.3195(12) 0.084(5) Uani 1 1 d . . . . .
C16 C 0.4202(8) 0.7491(8) 0.5993(9) 0.065(5) Uani 1 1 d . . . . .
H16 H 0.453889 0.76157 0.643846 0.077 Uiso 1 1 calc R U . . .
C34 C 0.3275(10) 0.9597(7) -0.0913(11) 0.075(5) Uani 1 1 d . . . . .
H34 H 0.364209 0.965477 -0.094988 0.09 Uiso 1 1 calc R U . . .
C17 C 0.3783(7) 0.7194(8) 0.6143(9) 0.055(4) Uani 1 1 d . . . . .
H17 H 0.382285 0.711981 0.669195 0.066 Uiso 1 1 calc R U . . .
C33 C 0.3116(8) 0.9018(8) -0.0632(10) 0.069(4) Uani 1 1 d . U . . .
H33 H 0.337607 0.869053 -0.049795 0.083 Uiso 1 1 calc R U . . .
C35 C 0.2344(9) 0.9936(8) -0.1063(10) 0.071(5) Uani 1 1 d . . . . .
H35 H 0.206597 1.024679 -0.12455 0.086 Uiso 1 1 calc R U . . .
C36 C 0.2180(9) 0.9430(7) -0.0773(11) 0.068(5) Uani 1 1 d . . . . .
H36 H 0.181679 0.939823 -0.071656 0.082 Uiso 1 1 calc R U . . .
C3S C 0.1485(11) 0.4329(10) 0.3305(15) 0.095(7) Uani 1 1 d . . . . .
H3S1 H 0.111259 0.435896 0.336976 0.142 Uiso 1 1 calc R U . . .
H3S2 H 0.142503 0.416185 0.276568 0.142 Uiso 1 1 calc R U . . .
H3S3 H 0.174599 0.406951 0.373321 0.142 Uiso 1 1 calc R U . . .
C1S C 0.2281(9) 0.4969(10) 0.3300(13) 0.082(6) Uani 1 1 d . . . . .
C2S C 0.1730(16) 0.4891(16) 0.337(2) 0.158(12) Uani 1 1 d . U . . .
H2S1 H 0.176621 0.505383 0.391197 0.189 Uiso 1 1 calc R U . . .
H2S2 H 0.144723 0.514559 0.295042 0.189 Uiso 1 1 calc R U . . .
O1 O 0.1739(5) 0.7577(5) 0.0375(7) 0.059(3) Uani 1 1 d . . . . .
C27 C 0.1491(7) 0.7930(7) 0.0763(9) 0.056(4) Uani 1 1 d . . . . .
C28 C 0.1781(9) 0.8442(9) 0.1209(13) 0.080(5) Uani 1 1 d . U . . .
H28 H 0.21429 0.855416 0.119047 0.096 Uiso 1 1 calc R U . . .
C29 C 0.1548(9) 0.8784(9) 0.1671(14) 0.084(5) Uani 1 1 d . U . . .
H29 H 0.174768 0.911443 0.198958 0.101 Uiso 1 1 calc R U . . .
C30 C 0.0731(7) 0.8110(10) 0.1251(10) 0.072(5) Uani 1 1 d . . . . .
H30 H 0.036839 0.799561 0.126573 0.087 Uiso 1 1 calc R U . . .
C31 C 0.0978(8) 0.7767(7) 0.0840(9) 0.060(4) Uani 1 1 d . . . . .
H31 H 0.079448 0.740473 0.059998 0.072 Uiso 1 1 calc R U . . .
S1A S 0.5273(7) 0.8978(7) 0.6387(10) 0.178(6) Uani 0.65 1 d D U P A 1
F1A F 0.4185(8) 0.9066(10) 0.5497(15) 0.141(8) Uani 0.65 1 d D U P A 1
F2A F 0.4562(11) 0.9826(10) 0.6253(17) 0.172(11) Uani 0.65 1 d D U P A 1
F3A F 0.4760(19) 0.9640(18) 0.5181(18) 0.30(2) Uani 0.65 1 d D U P A 1
O2A O 0.5360(11) 0.8645(12) 0.5782(14) 0.116(8) Uani 0.65 1 d D U P A 1
C1A C 0.4639(9) 0.9414(10) 0.5799(15) 0.096(10) Uani 0.65 1 d D U P A 1
O1A O 0.5700(13) 0.9407(13) 0.690(2) 0.160(12) Uani 0.65 1 d D U P A 1
O3A O 0.5162(13) 0.8629(12) 0.6950(15) 0.182(14) Uani 0.65 1 d D U P A 1
O4A O 0.4871(7) 0.5640(13) 0.6684(11) 0.266(19) Uani 0.85 1 d D U P . .
S2A S 0.4262(5) 0.5531(5) 0.6341(6) 0.156(4) Uani 0.85 1 d D U P . .
C2A C 0.4027(8) 0.5613(8) 0.5265(8) 0.086(7) Uani 0.85 1 d D U P . .
O5A O 0.4104(12) 0.4973(9) 0.6519(12) 0.251(17) Uani 0.85 1 d D U P . .
O6A O 0.4005(10) 0.5943(10) 0.6717(13) 0.167(9) Uani 0.85 1 d D U P . .
F4A F 0.3464(7) 0.5568(10) 0.4954(11) 0.202(10) Uani 0.85 1 d D U P . .
F5A F 0.4265(8) 0.5179(8) 0.4976(9) 0.146(7) Uani 0.85 1 d D U P . .
F6A F 0.4208(9) 0.6135(8) 0.5099(11) 0.182(9) Uani 0.85 1 d D U P . .

loop_
    _atom_site_aniso_label
    _atom_site_aniso_U_11
    _atom_site_aniso_U_22
    _atom_site_aniso_U_33
    _atom_site_aniso_U_23
    _atom_site_aniso_U_13
    _atom_site_aniso_U_12
Yb1 0.0282(4) 0.0197(4) 0.0396(4) 0.0030(3) 0.0177(3) -0.0026(3)
Fe1 0.0328(9) 0.0311(9) 0.0369(9) -0.0083(7) 0.0213(7) -0.0083(7)
N6 0.032(5) 0.025(5) 0.044(6) -0.001(4) 0.026(5) -0.001(4)
N1 0.035(5) 0.037(5) 0.039(6) -0.003(4) 0.026(5) 0.003(4)
N4 0.030(5) 0.037(5) 0.036(5) -0.010(4) 0.021(4) -0.007(4)
N2 0.048(6) 0.034(6) 0.049(6) -0.010(5) 0.036(5) -0.001(5)
O2 0.086(8) 0.040(6) 0.077(7) 0.013(5) 0.040(7) 0.003(5)
N3 0.034(5) 0.037(5) 0.032(5) -0.005(4) 0.021(4) -0.014(4)
C26 0.030(6) 0.040(7) 0.040(7) -0.007(5) 0.018(5) -0.001(5)
C25 0.029(6) 0.036(6) 0.053(8) 0.002(6) 0.021(6) -0.005(5)
N5 0.043(6) 0.039(6) 0.035(5) -0.011(4) 0.021(5) 0.006(5)
C2 0.028(6) 0.041(7) 0.035(6) -0.011(5) 0.023(5) -0.010(5)
C1 0.025(5) 0.025(5) 0.045(7) -0.009(5) 0.024(5) -0.007(4)
C19 0.045(7) 0.034(6) 0.041(7) 0.002(5) 0.030(6) 0.005(5)
C23 0.041(7) 0.027(6) 0.044(7) -0.007(5) 0.030(6) -0.002(5)
C14 0.034(6) 0.037(6) 0.050(7) -0.012(5) 0.027(6) -0.008(5)
C24 0.035(7) 0.037(7) 0.078(10) 0.004(7) 0.035(7) -0.001(5)
N8 0.124(13) 0.029(6) 0.046(7) 0.005(5) 0.040(8) -0.017(7)
C22 0.048(8) 0.033(6) 0.069(9) -0.001(6) 0.048(7) 0.001(5)
C7 0.029(6) 0.043(7) 0.030(6) -0.010(5) 0.015(5) -0.005(5)
C3 0.042(7) 0.035(6) 0.040(7) -0.015(5) 0.017(6) -0.011(5)
C15 0.047(7) 0.043(7) 0.047(8) -0.009(6) 0.024(6) 0.005(6)
C5 0.026(5) 0.052(6) 0.038(6) -0.003(5) 0.024(4) -0.008(5)
C6 0.039(7) 0.055(8) 0.037(6) -0.014(6) 0.024(5) -0.019(6)
C18 0.055(8) 0.058(8) 0.041(7) 0.006(6) 0.034(7) 0.019(7)
C11 0.023(5) 0.042(6) 0.032(6) -0.003(5) 0.015(5) -0.001(5)
C12 0.040(7) 0.051(8) 0.064(9) 0.000(7) 0.027(7) 0.007(6)
C20 0.066(9) 0.062(9) 0.047(8) 0.004(7) 0.052(8) 0.011(7)
C10 0.032(6) 0.044(7) 0.049(7) -0.013(6) 0.021(6) -0.002(5)
C21 0.059(9) 0.051(8) 0.066(10) 0.005(7) 0.057(8) 0.004(7)
N7 0.080(8) 0.079(8) 0.093(8) -0.006(6) 0.056(7) 0.006(6)
C4 0.038(7) 0.047(7) 0.040(7) -0.007(6) 0.023(6) -0.018(6)
C13 0.058(9) 0.036(7) 0.074(10) -0.015(7) 0.039(8) -0.004(6)
C32 0.060(7) 0.050(7) 0.052(7) -0.017(5) 0.026(6) -0.017(6)
C9 0.028(6) 0.061(9) 0.067(9) -0.023(7) 0.022(6) 0.003(6)
C8 0.032(4) 0.055(5) 0.048(5) -0.005(4) 0.027(4) -0.001(4)
N1S 0.083(11) 0.066(9) 0.120(14) -0.016(9) 0.057(11) -0.014(8)
C16 0.063(10) 0.087(12) 0.041(8) -0.030(8) 0.016(7) 0.016(9)
C34 0.127(17) 0.047(9) 0.070(11) 0.003(8) 0.057(11) -0.010(10)
C17 0.056(9) 0.079(11) 0.042(8) 0.004(7) 0.031(7) 0.019(8)
C33 0.083(8) 0.065(8) 0.059(7) -0.007(6) 0.025(6) 0.021(7)
C35 0.095(13) 0.060(10) 0.059(10) 0.015(8) 0.029(10) -0.023(9)
C36 0.087(12) 0.041(8) 0.073(11) 0.002(8) 0.025(10) -0.004(8)
C3S 0.115(18) 0.084(14) 0.110(17) 0.004(12) 0.071(15) 0.000(13)
C1S 0.072(12) 0.097(15) 0.087(14) 0.011(11) 0.042(11) -0.006(11)
C2S 0.153(15) 0.153(15) 0.167(15) 0.009(10) 0.060(10) -0.004(10)
O1 0.051(6) 0.057(6) 0.072(7) -0.007(5) 0.029(5) -0.005(5)
C27 0.048(8) 0.065(10) 0.055(9) -0.009(7) 0.018(7) 0.016(7)
C28 0.071(8) 0.076(9) 0.100(9) -0.007(7) 0.041(7) -0.001(7)
C29 0.081(9) 0.075(9) 0.105(10) -0.011(7) 0.043(8) -0.001(7)
C30 0.048(9) 0.127(16) 0.054(9) -0.010(10) 0.033(8) -0.036(10)
C31 0.077(11) 0.051(9) 0.047(8) 0.004(7) 0.019(8) -0.010(8)
S1A 0.178(6) 0.178(6) 0.178(6) -0.0009(10) 0.066(2) 0.0003(10)
F1A 0.121(11) 0.136(11) 0.154(12) -0.008(9) 0.039(8) 0.003(9)
F2A 0.160(13) 0.169(14) 0.183(14) -0.018(9) 0.062(9) 0.007(9)
F3A 0.30(3) 0.30(3) 0.30(3) 0.002(10) 0.120(13) -0.003(10)
O2A 0.103(11) 0.125(11) 0.117(11) -0.036(8) 0.038(8) 0.025(8)
C1A 0.094(11) 0.094(11) 0.098(11) 0.000(5) 0.036(6) -0.001(5)
O1A 0.151(14) 0.150(14) 0.164(15) -0.020(9) 0.042(10) -0.007(9)
O3A 0.179(15) 0.184(15) 0.181(15) 0.002(5) 0.067(7) -0.003(5)
O4A 0.25(2) 0.27(2) 0.27(2) 0.003(10) 0.091(12) 0.004(10)
S2A 0.181(8) 0.147(7) 0.150(7) 0.020(6) 0.072(6) 0.049(6)
C2A 0.086(8) 0.087(8) 0.087(8) 0.000(5) 0.035(5) 0.002(5)
O5A 0.251(19) 0.24(2) 0.26(2) 0.010(10) 0.101(11) -0.022(10)
O6A 0.172(13) 0.178(13) 0.172(12) -0.033(9) 0.087(9) 0.034(9)
F4A 0.200(13) 0.205(13) 0.202(13) -0.002(9) 0.075(9) -0.005(9)
F5A 0.157(10) 0.138(10) 0.149(10) 0.003(8) 0.063(8) 0.014(8)
F6A 0.183(12) 0.177(12) 0.192(12) -0.001(9) 0.079(9) -0.008(9)


#----------------------------------------------------------------------------#
#                   MOLECULAR GEOMETRY                                       #
#----------------------------------------------------------------------------#

_geom_special_details
;
 All esds (except the esd in the dihedral angle between two l.s. planes)
 are estimated using the full covariance matrix.  The cell esds are taken
 into account individually in the estimation of esds in distances, angles
 and torsion angles; correlations between esds in cell parameters are only
 used when they are defined by crystal symmetry.  An approximate (isotropic)
 treatment of cell esds is used for estimating esds involving l.s. planes.
;
loop_
    _geom_bond_atom_site_label_1
    _geom_bond_atom_site_label_2
    _geom_bond_distance
    _geom_bond_site_symmetry_2
    _geom_bond_publ_flag
Yb1 O2 2.142(10) 7_565 ?
Yb1 O2 2.142(10) . ?
Yb1 O1 2.194(10) . ?
Yb1 O1 2.194(10) 7_565 ?
Yb1 N1 2.314(10) 7_565 ?
Yb1 N1 2.314(10) . ?
Fe1 C1 1.896(12) . ?
Fe1 C2 1.912(12) . ?
Fe1 N3 1.975(9) . ?
Fe1 N6 1.980(9) . ?
Fe1 N5 2.000(10) . ?
Fe1 N4 2.006(10) . ?
N6 C26 1.329(15) . ?
N6 C23 1.360(14) . ?
N1 C1 1.157(15) . ?
N4 C14 1.322(15) . ?
N4 C11 1.361(14) . ?
N2 C2 1.147(15) . ?
O2 C32 1.332(17) . ?
N3 C3 1.349(15) . ?
N3 C7 1.364(15) . ?
C26 C25 1.380(16) . ?
C25 C24 1.351(18) . ?
N5 C15 1.334(18) . ?
N5 C19 1.359(15) . ?
C19 C18 1.414(17) . ?
C19 C23 1.417(17) . ?
C23 C22 1.403(16) . ?
C14 C13 1.406(18) . ?
C24 C22 1.41(2) . ?
N8 C34 1.32(2) . ?
N8 C35 1.35(2) . ?
C22 C21 1.439(19) . ?
C7 C6 1.401(17) . ?
C7 C11 1.406(16) . ?
C3 C4 1.389(17) . ?
C15 C16 1.43(2) . ?
C5 C4 1.359(18) . ?
C5 C6 1.422(17) . ?
C6 C8 1.420(18) . ?
C18 C17 1.41(2) . ?
C18 C20 1.44(2) . ?
C11 C10 1.418(17) . ?
C12 C13 1.376(19) . ?
C12 C10 1.392(19) . ?
C20 C21 1.34(2) . ?
C10 C9 1.407(17) . ?
N7 C30 1.30(2) . ?
N7 C29 1.41(2) . ?
C32 C36 1.34(2) . ?
C32 C33 1.37(2) . ?
C9 C8 1.361(19) . ?
N1S C1S 1.06(2) . ?
C16 C17 1.32(2) . ?
C34 C33 1.47(2) . ?
C35 C36 1.34(2) . ?
C3S C2S 1.36(4) . ?
C1S C2S 1.41(4) . ?
O1 C27 1.311(17) . ?
C27 C31 1.36(2) . ?
C27 C28 1.40(2) . ?
C28 C29 1.37(3) . ?
C30 C31 1.33(2) . ?
S1A O3A 1.344(15) . ?
S1A O2A 1.356(16) . ?
S1A O1A 1.436(17) . ?
S1A C1A 1.776(16) . ?
F1A C1A 1.283(17) . ?
F2A C1A 1.259(17) . ?
F3A C1A 1.307(18) . ?
O4A S2A 1.399(15) . ?
S2A O5A 1.356(14) . ?
S2A O6A 1.392(14) . ?
S2A C2A 1.734(13) . ?
C2A F4A 1.277(15) . ?
C2A F6A 1.301(15) . ?
C2A F5A 1.309(15) . ?

loop_
    _geom_angle_atom_site_label_1
    _geom_angle_atom_site_label_2
    _geom_angle_atom_site_label_3
    _geom_angle
    _geom_angle_site_symmetry_1
    _geom_angle_site_symmetry_3
    _geom_angle_publ_flag
O2 Yb1 O2 180 7_565 . ?
O2 Yb1 O1 89.6(4) 7_565 . ?
O2 Yb1 O1 90.4(4) . . ?
O2 Yb1 O1 90.4(4) 7_565 7_565 ?
O2 Yb1 O1 89.6(4) . 7_565 ?
O1 Yb1 O1 180 . 7_565 ?
O2 Yb1 N1 91.8(4) 7_565 7_565 ?
O2 Yb1 N1 88.2(4) . 7_565 ?
O1 Yb1 N1 92.7(4) . 7_565 ?
O1 Yb1 N1 87.3(4) 7_565 7_565 ?
O2 Yb1 N1 88.2(4) 7_565 . ?
O2 Yb1 N1 91.8(4) . . ?
O1 Yb1 N1 87.3(4) . . ?
O1 Yb1 N1 92.7(4) 7_565 . ?
N1 Yb1 N1 180 7_565 . ?
C1 Fe1 C2 89.2(5) . . ?
C1 Fe1 N3 91.6(4) . . ?
C2 Fe1 N3 93.7(4) . . ?
C1 Fe1 N6 93.6(4) . . ?
C2 Fe1 N6 93.2(4) . . ?
N3 Fe1 N6 171.4(4) . . ?
C1 Fe1 N5 175.5(4) . . ?
C2 Fe1 N5 90.2(4) . . ?
N3 Fe1 N5 92.8(4) . . ?
N6 Fe1 N5 82.0(4) . . ?
C1 Fe1 N4 91.3(4) . . ?
C2 Fe1 N4 175.8(4) . . ?
N3 Fe1 N4 82.1(4) . . ?
N6 Fe1 N4 90.9(4) . . ?
N5 Fe1 N4 89.7(4) . . ?
C26 N6 C23 116.9(10) . . ?
C26 N6 Fe1 130.0(8) . . ?
C23 N6 Fe1 113.0(8) . . ?
C1 N1 Yb1 158.1(8) . . ?
C14 N4 C11 117.7(10) . . ?
C14 N4 Fe1 130.6(8) . . ?
C11 N4 Fe1 111.7(7) . . ?
C32 O2 Yb1 157.2(10) . . ?
C3 N3 C7 116.6(10) . . ?
C3 N3 Fe1 129.9(9) . . ?
C7 N3 Fe1 113.5(7) . . ?
N6 C26 C25 123.8(12) . . ?
C24 C25 C26 118.9(12) . . ?
C15 N5 C19 118.0(11) . . ?
C15 N5 Fe1 129.4(9) . . ?
C19 N5 Fe1 112.6(8) . . ?
N2 C2 Fe1 178.6(12) . . ?
N1 C1 Fe1 177.6(9) . . ?
N5 C19 C18 123.7(12) . . ?
N5 C19 C23 115.9(10) . . ?
C18 C19 C23 120.4(11) . . ?
N6 C23 C22 123.9(12) . . ?
N6 C23 C19 116.2(10) . . ?
C22 C23 C19 119.8(11) . . ?
N4 C14 C13 123.6(11) . . ?
C25 C24 C22 121.0(11) . . ?
C34 N8 C35 120.1(14) . . ?
C23 C22 C24 115.5(12) . . ?
C23 C22 C21 118.8(13) . . ?
C24 C22 C21 125.7(12) . . ?
N3 C7 C6 124.5(11) . . ?
N3 C7 C11 115.4(10) . . ?
C6 C7 C11 120.1(11) . . ?
N3 C3 C4 122.5(12) . . ?
N5 C15 C16 120.7(14) . . ?
C4 C5 C6 119.1(11) . . ?
C7 C6 C5 116.4(12) . . ?
C7 C6 C8 120.0(11) . . ?
C5 C6 C8 123.5(11) . . ?
C17 C18 C19 116.0(13) . . ?
C17 C18 C20 125.4(12) . . ?
C19 C18 C20 118.5(13) . . ?
N4 C11 C7 117.2(10) . . ?
N4 C11 C10 122.9(11) . . ?
C7 C11 C10 119.8(10) . . ?
C13 C12 C10 120.2(12) . . ?
C21 C20 C18 120.9(12) . . ?
C12 C10 C9 124.7(12) . . ?
C12 C10 C11 117.1(11) . . ?
C9 C10 C11 118.1(12) . . ?
C20 C21 C22 121.5(12) . . ?
C30 N7 C29 122.0(15) . . ?
C5 C4 C3 120.7(12) . . ?
C12 C13 C14 118.4(12) . . ?
O2 C32 C36 120.2(14) . . ?
O2 C32 C33 116.9(15) . . ?
C36 C32 C33 122.9(16) . . ?
C8 C9 C10 122.8(13) . . ?
C9 C8 C6 119.0(11) . . ?
C17 C16 C15 121.1(15) . . ?
N8 C34 C33 117.0(17) . . ?
C16 C17 C18 120.4(13) . . ?
C32 C33 C34 118.2(16) . . ?
C36 C35 N8 126.0(19) . . ?
C35 C36 C32 115.7(18) . . ?
N1S C1S C2S 170(3) . . ?
C3S C2S C1S 120(3) . . ?
C27 O1 Yb1 143.3(10) . . ?
O1 C27 C31 121.0(15) . . ?
O1 C27 C28 121.5(15) . . ?
C31 C27 C28 116.9(15) . . ?
C29 C28 C27 122.0(18) . . ?
C28 C29 N7 115.4(18) . . ?
N7 C30 C31 121.5(15) . . ?
C30 C31 C27 121.6(16) . . ?
O3A S1A O2A 112.3(16) . . ?
O3A S1A O1A 103.1(15) . . ?
O2A S1A O1A 123(2) . . ?
O3A S1A C1A 110.7(14) . . ?
O2A S1A C1A 102.0(16) . . ?
O1A S1A C1A 105.7(18) . . ?
F2A C1A F1A 111.9(18) . . ?
F2A C1A F3A 111.5(19) . . ?
F1A C1A F3A 109(3) . . ?
F2A C1A S1A 109.6(15) . . ?
F1A C1A S1A 110.0(14) . . ?
F3A C1A S1A 104.7(16) . . ?
O5A S2A O6A 105.4(12) . . ?
O5A S2A O4A 114.0(13) . . ?
O6A S2A O4A 106.6(13) . . ?
O5A S2A C2A 109.2(10) . . ?
O6A S2A C2A 114.1(11) . . ?
O4A S2A C2A 107.7(10) . . ?
F4A C2A F6A 112.1(14) . . ?
F4A C2A F5A 110.3(15) . . ?
F6A C2A F5A 108.8(14) . . ?
F4A C2A S2A 108.1(11) . . ?
F6A C2A S2A 108.9(11) . . ?
F5A C2A S2A 108.5(10) . . ?

_iucr_refine_instructions_details
;
TITL MLKS338_12_0m_a.res in C2/c
    shelx.res
    created by SHELXL-2018/3 at 11:53:06 on 09-Mar-2021
CELL  0.71073  24.4129  21.9879  17.2644   90.000  112.169   90.000
ZERR     4.00   0.0027   0.0024   0.0020    0.000    0.003    0.000
LATT   7
SYMM  - X,   Y, 1/2 - Z
SFAC  C    H    F    FE   N    O    S    YB
UNIT  324 248 36 8 72 52 12 4
MERG   2
ISOR  0.01 0.01 O4A F6A F1A F3A C2S S2A F4A
ISOR 0.01 0.01 o5a o6a f2a o1a o2a c8 f5a
ISOR 0.005 0.005 c1a o3a C2A c8
ISOR 0.001 0.001 s1a
ISOR 0.01 0.01 c29 c28 n7 c5 c32 c33
DFIX 2.5 S1a f1a
DFIX 2.5 S1a f2a
DFIX 2.5 S1a f3a
DFIX 1.4 S1a o1a
DFIX 1.4 S1a o2a
DFIX 1.4 S1a o3a
DFIX 1.3 c1a f1a
DFIX 1.3 c1a f2a
DFIX 1.3 c1a f3a
DFIX 2.6 c1a o3a
DFIX 2.1 f1a f2a
DFIX 2.1 f2a f3a
DFIX 1.8 s1a c1a
DFIX 2.2 o1a o3a
DFIX 2.2 o2a o3a
DFIX  1.7 S2A C2A
DFIX  1.4 S2A O4A
DFIX  1.4 S2A O5A
DFIX  1.4 S2A O6A
DFIX 1.3 c2a f4a
DFIX 1.3 c2a f5a
DFIX 1.3 c2a f6a
DFIX  2.5 S2A F4A
DFIX  2.5 S2A F5A
DFIX  2.5 S2A F6A
DFIX 2.6 c2a o4a
DFIX 2.6 c2a o5a
DFIX 2.6 c2a o6a
DFIX 2.1 f4a f6a
DFIX 2.1 f4a f5a
DFIX 2.1 f5a f6a
DFIX 2.2 o4a o6a
DFIX 2.2 o4a o5a
DFIX 2.2 o5a o6a
DFIX 2.8 o5a f4a
DFIX 2.9 o5a f5a
DFIX 2.8 o4a f6a
DFIX 2.9 o4a f5a
FMAP   2
PLAN   40
ACTA
BOND
LIST   4
L.S.  30
TEMP    23.00
WGHT    0.127500  356.202637
FVAR       0.09981
YB1   8    0.250000    0.750000    0.000000    10.50000    0.02825    0.01967 =
         0.03955    0.00301    0.01765   -0.00261
FE1   4    0.349478    0.753910    0.328272    11.00000    0.03283    0.03111 =
         0.03690   -0.00832    0.02133   -0.00833
N6    5    0.274185    0.715196    0.319794    11.00000    0.03231    0.02518 =
         0.04383   -0.00115    0.02590   -0.00084
N1    5    0.309435    0.766420    0.138812    11.00000    0.03467    0.03663 =
         0.03882   -0.00316    0.02589    0.00325
N4    5    0.385484    0.672328    0.325595    11.00000    0.03032    0.03701 =
         0.03585   -0.01006    0.02126   -0.00692
N2    5    0.304797    0.882715    0.336886    11.00000    0.04767    0.03398 =
         0.04907   -0.01012    0.03555   -0.00102
O2    6    0.245386    0.845426   -0.026811    11.00000    0.08556    0.04002 =
         0.07684    0.01335    0.03959    0.00319
N3    5    0.430379    0.781884    0.347049    11.00000    0.03372    0.03746 =
         0.03178   -0.00483    0.02147   -0.01399
C26   1    0.226645    0.701534    0.252650    11.00000    0.03016    0.04030 =
         0.03951   -0.00732    0.01798   -0.00052
AFIX  43
H26   2    0.226288    0.712714    0.200509    11.00000   -1.20000
AFIX   0
C25   1    0.177784    0.671734    0.255763    11.00000    0.02852    0.03639 =
         0.05262    0.00214    0.02116   -0.00472
AFIX  43
H25   2    0.145578    0.663156    0.206896    11.00000   -1.20000
AFIX   0
N5    5    0.367959    0.743370    0.450624    11.00000    0.04250    0.03938 =
         0.03480   -0.01082    0.02058    0.00584
C2    1    0.320848    0.834227    0.332947    11.00000    0.02783    0.04123 =
         0.03462   -0.01114    0.02280   -0.01042
C1    1    0.325740    0.762362    0.210821    11.00000    0.02528    0.02484 =
         0.04473   -0.00915    0.02381   -0.00681
C19   1    0.324454    0.713536    0.466289    11.00000    0.04549    0.03429 =
         0.04087    0.00185    0.02969    0.00516
C23   1    0.273861    0.697764    0.395200    11.00000    0.04127    0.02713 =
         0.04371   -0.00719    0.03017   -0.00181
C14   1    0.361169    0.617683    0.309598    11.00000    0.03447    0.03749 =
         0.05012   -0.01176    0.02746   -0.00782
AFIX  43
H14   2    0.320892    0.614281    0.298159    11.00000   -1.20000
AFIX   0
C24   1    0.177505    0.655221    0.331005    11.00000    0.03522    0.03733 =
         0.07784    0.00399    0.03533   -0.00100
AFIX  43
H24   2    0.144630    0.635423    0.333776    11.00000   -1.20000
AFIX   0
N8    5    0.287330    1.003483   -0.111285    11.00000    0.12384    0.02918 =
         0.04623    0.00533    0.03950   -0.01735
AFIX  43
H8A   2    0.295070    1.038291   -0.127488    11.00000   -1.20000
AFIX   0
C22   1    0.226406    0.667589    0.405491    11.00000    0.04801    0.03323 =
         0.06913   -0.00063    0.04811    0.00147
C7    1    0.468748    0.735641    0.351701    11.00000    0.02903    0.04324 =
         0.03011   -0.01007    0.01540   -0.00543
C3    1    0.452813    0.838705    0.357443    11.00000    0.04236    0.03501 =
         0.04034   -0.01537    0.01721   -0.01147
AFIX  43
H3    2    0.428357    0.871087    0.357633    11.00000   -1.20000
AFIX   0
C15   1    0.414776    0.762557    0.515787    11.00000    0.04692    0.04334 =
         0.04707   -0.00932    0.02352    0.00486
AFIX  43
H15   2    0.444159    0.784895    0.506729    11.00000   -1.20000
AFIX   0
C5    1    0.549390    0.804612    0.373463    11.00000    0.02629    0.05157 =
         0.03798   -0.00347    0.02374   -0.00817
AFIX  43
H5    2    0.588824    0.812797    0.383265    11.00000   -1.20000
AFIX   0
C6    1    0.528419    0.743650    0.364123    11.00000    0.03852    0.05532 =
         0.03736   -0.01379    0.02366   -0.01896
C18   1    0.327510    0.698881    0.547546    11.00000    0.05508    0.05820 =
         0.04105    0.00555    0.03385    0.01899
C11   1    0.444198    0.676899    0.340531    11.00000    0.02252    0.04209 =
         0.03158   -0.00291    0.01472   -0.00128
C12   1    0.452704    0.569106    0.327387    11.00000    0.03964    0.05143 =
         0.06375   -0.00030    0.02728    0.00688
AFIX  43
H12   2    0.474883    0.534271    0.329744    11.00000   -1.20000
AFIX   0
C20   1    0.278377    0.667768    0.556114    11.00000    0.06570    0.06196 =
         0.04676    0.00430    0.05168    0.01072
AFIX  43
H20   2    0.279584    0.658126    0.609184    11.00000   -1.20000
AFIX   0
C10   1    0.480121    0.625773    0.342526    11.00000    0.03236    0.04369 =
         0.04865   -0.01261    0.02087   -0.00201
C21   1    0.230775    0.652418    0.488671    11.00000    0.05932    0.05105 =
         0.06598    0.00539    0.05717    0.00429
AFIX  43
H21   2    0.199912    0.631504    0.495843    11.00000   -1.20000
AFIX   0
N7    5    0.098389    0.860246    0.163193    11.00000    0.08017    0.07852 =
         0.09278   -0.00591    0.05638    0.00623
AFIX  43
H7    2    0.080232    0.882523    0.186838    11.00000   -1.20000
AFIX   0
C4    1    0.511047    0.850730    0.367876    11.00000    0.03794    0.04738 =
         0.03962   -0.00702    0.02284   -0.01758
AFIX  43
H4    2    0.523925    0.890796    0.371072    11.00000   -1.20000
AFIX   0
C13   1    0.392886    0.564448    0.308942    11.00000    0.05761    0.03574 =
         0.07415   -0.01509    0.03885   -0.00391
AFIX  43
H13   2    0.373894    0.526979    0.296344    11.00000   -1.20000
AFIX   0
C32   1    0.257317    0.897294   -0.057097    11.00000    0.05984    0.05002 =
         0.05161   -0.01703    0.02582   -0.01745
C9    1    0.540346    0.635768    0.358565    11.00000    0.02784    0.06094 =
         0.06683   -0.02290    0.02167    0.00287
AFIX  43
H9    2    0.564819    0.602260    0.364306    11.00000   -1.20000
AFIX   0
C8    1    0.564310    0.692409    0.366036    11.00000    0.03174    0.05483 =
         0.04834   -0.00518    0.02659   -0.00081
AFIX  43
H8    2    0.603579    0.697468    0.372295    11.00000   -1.20000
AFIX   0
N1S   5    0.266347    0.510137    0.319503    11.00000    0.08282    0.06588 =
         0.11976   -0.01609    0.05728   -0.01414
C16   1    0.420224    0.749147    0.599275    11.00000    0.06313    0.08673 =
         0.04082   -0.02985    0.01631    0.01558
AFIX  43
H16   2    0.453889    0.761570    0.643846    11.00000   -1.20000
AFIX   0
C34   1    0.327518    0.959750   -0.091328    11.00000    0.12664    0.04706 =
         0.06969    0.00324    0.05722   -0.01037
AFIX  43
H34   2    0.364209    0.965477   -0.094988    11.00000   -1.20000
AFIX   0
C17   1    0.378319    0.719429    0.614307    11.00000    0.05579    0.07934 =
         0.04241    0.00408    0.03148    0.01894
AFIX  43
H17   2    0.382285    0.711981    0.669195    11.00000   -1.20000
AFIX   0
C33   1    0.311600    0.901821   -0.063168    11.00000    0.08255    0.06518 =
         0.05930   -0.00721    0.02527    0.02107
AFIX  43
H33   2    0.337607    0.869053   -0.049795    11.00000   -1.20000
AFIX   0
C35   1    0.234361    0.993589   -0.106270    11.00000    0.09504    0.05962 =
         0.05900    0.01493    0.02889   -0.02293
AFIX  43
H35   2    0.206597    1.024679   -0.124550    11.00000   -1.20000
AFIX   0
C36   1    0.217965    0.943024   -0.077339    11.00000    0.08666    0.04117 =
         0.07261    0.00242    0.02509   -0.00403
AFIX  43
H36   2    0.181679    0.939823   -0.071656    11.00000   -1.20000
AFIX   0
C3S   1    0.148546    0.432920    0.330538    11.00000    0.11544    0.08425 =
         0.10983    0.00401    0.07077   -0.00027
AFIX  33
H3S1  2    0.111259    0.435896    0.336976    11.00000   -1.50000
H3S2  2    0.142503    0.416185    0.276568    11.00000   -1.50000
H3S3  2    0.174599    0.406951    0.373321    11.00000   -1.50000
AFIX   0
C1S   1    0.228127    0.496856    0.330019    11.00000    0.07174    0.09731 =
         0.08718    0.01133    0.04162   -0.00563
C2S   1    0.172978    0.489100    0.337254    11.00000    0.15309    0.15348 =
         0.16669    0.00857    0.06045   -0.00382
AFIX  23
H2S1  2    0.176621    0.505383    0.391197    11.00000   -1.20000
H2S2  2    0.144723    0.514559    0.295042    11.00000   -1.20000
AFIX   0
O1    6    0.173859    0.757727    0.037522    11.00000    0.05118    0.05698 =
         0.07225   -0.00690    0.02865   -0.00538
C27   1    0.149072    0.792972    0.076267    11.00000    0.04793    0.06491 =
         0.05466   -0.00915    0.01800    0.01638
C28   1    0.178058    0.844236    0.120877    11.00000    0.07067    0.07554 =
         0.10050   -0.00714    0.04126   -0.00087
AFIX  43
H28   2    0.214290    0.855416    0.119047    11.00000   -1.20000
AFIX   0
C29   1    0.154788    0.878430    0.167097    11.00000    0.08050    0.07480 =
         0.10474   -0.01052    0.04280   -0.00146
AFIX  43
H29   2    0.174768    0.911443    0.198958    11.00000   -1.20000
AFIX   0
C30   1    0.073099    0.811032    0.125096    11.00000    0.04829    0.12679 =
         0.05367   -0.00962    0.03328   -0.03599
AFIX  43
H30   2    0.036839    0.799561    0.126573    11.00000   -1.20000
AFIX   0
C31   1    0.097753    0.776652    0.084049    11.00000    0.07695    0.05130 =
         0.04747    0.00362    0.01854   -0.01011
AFIX  43
H31   2    0.079448    0.740473    0.059998    11.00000   -1.20000
AFIX   0
PART    1
S1A   7    0.527259    0.897810    0.638653    10.65000    0.17770    0.17767 =
         0.17850   -0.00089    0.06647    0.00027
F1A   3    0.418542    0.906590    0.549687    10.65000    0.12128    0.13553 =
         0.15413   -0.00841    0.03950    0.00296
F2A   3    0.456195    0.982607    0.625318    10.65000    0.15983    0.16909 =
         0.18319   -0.01771    0.06158    0.00703
F3A   3    0.476049    0.964000    0.518146    10.65000    0.30414    0.30144 =
         0.30108    0.00224    0.11954   -0.00305
O2A   6    0.535978    0.864507    0.578219    10.65000    0.10290    0.12514 =
         0.11682   -0.03605    0.03827    0.02503
C1A   1    0.463895    0.941373    0.579860    10.65000    0.09417    0.09429 =
         0.09843   -0.00014    0.03552   -0.00103
O1A   6    0.569955    0.940675    0.689868    10.65000    0.15101    0.14978 =
         0.16441   -0.02034    0.04152   -0.00723
O3A   6    0.516249    0.862853    0.694960    10.65000    0.17919    0.18368 =
         0.18107    0.00168    0.06731   -0.00285
PART    0
O4A   6    0.487104    0.564043    0.668403    10.85000    0.25062    0.27188 =
         0.26969    0.00260    0.09089    0.00435
S2A   7    0.426154    0.553140    0.634083    10.85000    0.18053    0.14680 =
         0.15045    0.02010    0.07244    0.04944
C2A   1    0.402681    0.561261    0.526471    10.85000    0.08565    0.08736 =
         0.08691    0.00016    0.03519    0.00221
O5A   6    0.410377    0.497339    0.651909    10.85000    0.25140    0.24178 =
         0.26239    0.00970    0.10119   -0.02194
O6A   6    0.400486    0.594271    0.671684    10.85000    0.17180    0.17755 =
         0.17183   -0.03306    0.08727    0.03375
F4A   3    0.346386    0.556801    0.495365    10.85000    0.19959    0.20496 =
         0.20185   -0.00227    0.07491   -0.00460
F5A   3    0.426523    0.517913    0.497649    10.85000    0.15679    0.13833 =
         0.14882    0.00321    0.06289    0.01413
F6A   3    0.420825    0.613528    0.509938    10.85000    0.18338    0.17687 =
         0.19243   -0.00056    0.07886   -0.00825
HKLF    4


REM  MLKS338_12_0m_a.res in C2/c
REM wR2 = 0.2888, GooF = S = 1.099, Restrained GooF = 1.109 for all data
REM R1 = 0.1043 for 6024 Fo > 4sig(Fo) and 0.1230 for all 7579 data
REM 610 parameters refined using 182 restraints

END

WGHT      0.1257    363.2450

REM Highest difference peak  3.750,  deepest hole -1.907,  1-sigma level  0.230
Q1    1   0.5000  0.6547  0.7500  10.50000  0.05    3.75
Q2    1   0.5000  0.6055  0.7500  10.50000  0.05    2.64
Q3    1   0.5264  0.9220  0.5833  11.00000  0.05    2.57
Q4    1   0.2945  0.8227 -0.0322  11.00000  0.05    2.09
Q5    1   0.1883  0.8128  0.0219  11.00000  0.05    2.02
Q6    1   0.5156  0.8862  0.6779  11.00000  0.05    1.91
Q7    1   0.4403  0.5758  0.7443  11.00000  0.05    1.76
Q8    1   0.2787  0.7522  0.0377  11.00000  0.05    1.55
Q9    1   0.2553  0.7771 -0.0204  11.00000  0.05    1.55
Q10   1   0.5278  0.8393  0.6285  11.00000  0.05    1.54
Q11   1   0.3869  0.5155  0.5860  11.00000  0.05    1.37
Q12   1   0.4366  0.9394  0.6409  11.00000  0.05    1.36
Q13   1   0.2545  0.7242 -0.0183  11.00000  0.05    1.26
Q14   1   0.4748  0.8810  0.7126  11.00000  0.05    1.11
Q15   1   0.3497  0.9053 -0.0567  11.00000  0.05    1.10
Q16   1   0.4583  0.9932  0.5692  11.00000  0.05    1.09
Q17   1   0.4891  0.9320  0.6591  11.00000  0.05    1.08
Q18   1   0.1529  0.8331  0.0613  11.00000  0.05    1.04
Q19   1   0.4767  0.9353  0.6139  11.00000  0.05    1.04
Q20   1   0.3919  0.5504  0.6756  11.00000  0.05    1.02
Q21   1   0.5000  0.8466  0.7500  10.50000  0.05    0.95
Q22   1   0.5148  0.5578  0.5581  11.00000  0.05    0.91
Q23   1   0.4367  0.9008  0.6187  11.00000  0.05    0.89
Q24   1   0.1341  0.8861  0.0594  11.00000  0.05    0.84
Q25   1   0.5599  0.9218  0.7370  11.00000  0.05    0.83
Q26   1   0.4661  0.9723  0.6780  11.00000  0.05    0.81
Q27   1   0.3618  0.7286  0.3596  11.00000  0.05    0.80
Q28   1   0.3207  0.7498  0.2877  11.00000  0.05    0.80
Q29   1   0.4232  0.9233  0.5007  11.00000  0.05    0.79
Q30   1   0.1532  0.4813  0.2761  11.00000  0.05    0.78
Q31   1   0.0865  0.8940  0.0989  11.00000  0.05    0.76
Q32   1   0.3616  0.7792  0.3585  11.00000  0.05    0.73
Q33   1   0.0323  0.9243  0.0804  11.00000  0.05    0.72
Q34   1   0.0620  0.8583  0.1169  11.00000  0.05    0.70
Q35   1   0.4541  0.9947  0.4183  11.00000  0.05    0.69
Q36   1   0.3801  0.5702  0.5872  11.00000  0.05    0.66
Q37   1   0.2890  0.8769 -0.0541  11.00000  0.05    0.65
Q38   1   0.3679  0.4791  0.5945  11.00000  0.05    0.65
Q39   1   0.2437  0.9157 -0.1007  11.00000  0.05    0.64
Q40   1   0.3047  0.7510  0.1668  11.00000  0.05    0.64
;

# END of CIF
